# Supplementary material for: Reduction in inequality in antenatal-care use and persistence of inequality in skilled birth attendance in the Philippines from 1993 to 2008
Source: PubMed Central journal article supplement — BMJ Open. 2013 Jun 12;3(6):e002507. doi: 10.1136/bmjopen-2012-002507 (PMC3686232; doi:10.1136/bmjopen-2012-002507), 2013-06-12
Supplement: bmjopen-2012-002507.draft_revisions.pdf [file bmjopen-2012-002507.draft_revisions.pdf]

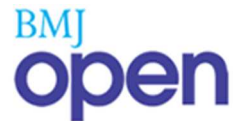

**Reduction in inequality in antenatal care use and persistence of inequality in skilled birth attendance in the Philippines from 1993 to 2008.**

|                                 |                                                                                                                                                                                                                                                                                                               |
|---------------------------------|---------------------------------------------------------------------------------------------------------------------------------------------------------------------------------------------------------------------------------------------------------------------------------------------------------------|
| Journal:                        | <i>BMJ Open</i>                                                                                                                                                                                                                                                                                               |
| Manuscript ID:                  | bmjopen-2012-002507                                                                                                                                                                                                                                                                                           |
| Article Type:                   | Research                                                                                                                                                                                                                                                                                                      |
| Date Submitted by the Author:   | 17-Dec-2012                                                                                                                                                                                                                                                                                                   |
| Complete List of Authors:       | Molina, Faith; Tokyo Medical and Dental University, International Health<br>Nakamura, Keiko; Tokyo Medical and Dental University, International Health<br>Kizuki, Masashi; Tokyo Medical and Dental University, Health Promotion<br>Seino, Kaoruko; Tokyo Medical and Dental University, International Health |
| <b>Primary Subject Heading</b>: | Public health                                                                                                                                                                                                                                                                                                 |
| Secondary Subject Heading:      | Reproductive medicine, Health services research, Health policy                                                                                                                                                                                                                                                |
| Keywords:                       | PUBLIC HEALTH, REPRODUCTIVE MEDICINE, SOCIAL MEDICINE, STATISTICS & RESEARCH METHODS                                                                                                                                                                                                                          |
|                                 |                                                                                                                                                                                                                                                                                                               |

SCHOLARONE™  
Manuscripts

1  
2  
3 1 **Title: Reduction in inequality in antenatal care use and persistence of inequality in skilled**  
4  
5  
6 2 **birth attendance in the Philippines from 1993 to 2008.**

7  
8 3 Faith Molina<sup>1</sup>, Keiko Nakamura<sup>1</sup>, Masashi Kizuki<sup>2</sup>, Seino Kaoruko<sup>1</sup>  
9  
10 4

11  
12 5 **Short Title:** Reduction in inequality in maternal health care use, Philippines  
13  
14 6

15  
16  
17 7 <sup>1</sup> International Health Section, Division of Public Health, Graduate School of Tokyo Medical and  
18  
19  
20 8 Dental University, Tokyo, Japan

21  
22 9 <sup>2</sup> Health Promotion Section, Division of Public Health, Graduate School of Tokyo Medical and  
23  
24  
25 10 Dental University, Tokyo, Japan  
26  
27 11

28  
29 12 **Corresponding author:** Keiko Nakamura  
30

31  
32 13 Postal Address: International Health and Medicine, Graduate School of Tokyo Medical and  
33  
34 14 Dental University, 1-5-45 Yushima, Bunkyo-ku, Tokyo 113-8519, Japan  
35

36 15 Email: [nakamura.ith@tmd.ac.jp](mailto:nakamura.ith@tmd.ac.jp)  
37

38  
39 16 Tel. +81 3 5803 4048; Fax. +81 3 5803 4032  
40  
41 17

42  
43 18 **Key Words:** socioeconomic factors, prenatal care/statistical & numerical data; healthcare  
44  
45  
46 19 disparities/statistics & numerical data, delivery, obstetrics/ statistics & numerical data, pregnancy  
47  
48 20

49  
50  
51 21 **Word Count:** 3059 words  
52  
53 22  
54  
55  
56  
57  
58  
59  
60

## ARTICLE SUMMARY

**Article Focus:** Assessing changes in the inequalities associated with maternal health care use according to living condition index in the Philippines.

### Key Messages:

- The study showed significant reduction in the inequality of ANC use through time suggesting substantial coverage of women in the lower living condition quintile.
- However, extreme inequality were shown to persist in SBA and MEDFAC indicating minimal professional delivery care among women under poorly equipped living conditions despite health system wide efforts and improvements in sociodemographic profile of the population.
- The results call for equity oriented research and policies to close the wide gap in skilled care at birth in the Philippines and to determine the success factors in the reduction of inequality in ANC.

### Strengths and Limitations:

- All population based demographic health survey followed a strict data quality checks through pre testing, translation of questionnaires to local dialect, interviewer training, and double data entry.

- 1  
2  
3  
4 1 • Employed standardized questionnaire format which are comparable between countries  
5  
6 2 and are carefully developed to ascertain accurate response and information from the  
7  
8 3 participants.  
9  
10  
11 4 • The number of subjects was limited to live birth within one year. Though this was done  
12  
13 5 to standardize varying sample size per data year, it reduced accuracy and increased  
14  
15 6 potential for error.  
16  
17  
18 7 • The computation of Living Condition Quintile was based on a limited set of variables.  
19  
20 8 This was done to standardize the different information provided for the variables in each  
21  
22 9 survey year. It is recommended to include more indicators to precisely describe the living  
23  
24 10 conditions of women.  
25  
26  
27  
28 11  
29  
30 12  
31  
32 13  
33  
34 14  
35  
36

## 37 ABSTRACT

38  
39 16

40  
41 17 **Objective:** To assess changes in the inequalities associated with maternal health care use  
42  
43 18 according to a living condition index in the Philippines.  
44  
45  
46 19

47  
48 20 **Design:** Prospective analysis on the level of inequalities using population based data between  
49  
50 21 1993 and 2008.  
51  
52  
53 22

54  
55 23 **Setting:** Philippines  
56  
57  
58  
59  
60

1  
2  
3  
4  
5  
6  
7  
8  
9  
10  
11  
12  
13  
14  
15  
16  
17  
18  
19  
20  
21  
22  
23  
24  
25  
26  
27  
28  
29  
30  
31  
32  
33  
34  
35  
36  
37  
38  
39  
40  
41  
42  
43  
44  
45  
46  
47  
48  
49  
50  
51  
52  
53  
54  
55  
56  
57  
58  
59  
60

1  
2 **Participants:** Women aged 15-49 years who had a live birth within one year in 1993 (n=1707),  
3 1998 (n=1513), 2003 (n=1325), and 2008 (n=1209)  
4

5 **Outcomes:** Coverage of antenatal care at least 4 visits (ANC), skilled attendance at birth (SBA)  
6 and delivery in a medical facility (MEDFAC).  
7

8 **Results:** The gradient of maternal health care utilization comparing the highest living condition  
9 quintile with the lowest quintile declined from 1993 to 2008: adjusted OR was 2.78 (95% CI  
10 1.64, 4.71) in 1993 and 1.99 (95% CI 1.05, 3.44) in 2008 for ANC; 5.84 (95% CI 2.77, 12.34) in  
11 1993 and 4.25 (95% CI 2.31, 7.83) in 2008 for SBA; and 3.70 (95% 2.22, 6.18) in 1993 and 2.68  
12 (95% CI 1.64, 4.38) in 2008 for MEDFAC. Considerable reduction in the level of inequality was  
13 observed in ANC compared to the persistence of large inequalities in SBA and MEDFAC:  
14 concentration index was 0.18 (SE: 0.013) in 1993 and 0.09 (SE: 0.010) in 2008 for ANC; 0.26  
15 (SE: 0.013) in 1993 and 0.24 (SE: 0.013) in 2008 for SBA; and 0.41 (SE: 0.016) in 1993 and  
16 0.34 (SE: 0.015) in 2008 for MEDFAC.  
17

18 **Conclusion:** Over a 16 year period, gradients in ANC decreased and high level of inequalities in  
19 SBA and MEDFAC persisted. The results also showed that disproportionate use of institutional  
20 care at birth among Filipino women from poorer equipped living conditions despite having  
21 sufficient coverage of ANC.  
22  
23

1  
2  
3  
4  
5  
6  
7  
8  
9  
10  
11  
12  
13  
14  
15  
16  
17  
18  
19  
20  
21  
22  
23  
24  
25  
26  
27  
28  
29  
30  
31  
32  
33  
34  
35  
36  
37  
38  
39  
40  
41  
42  
43  
44  
45  
46  
47  
48  
49  
50  
51  
52  
53  
54  
55  
56  
57  
58  
59  
60

1  
2  
3  
4  
5  
6  
7  
8  
9  
10  
11  
12  
13  
14

For peer review only

## 1 INTRODUCTION

2  
3 Globally, there is an increasing concern regarding inequities in maternal health, especially in  
4 developing countries. [1] The slow pace of reduction in maternal mortality rates despite cost-  
5 effective solutions has urged the international community to look beyond accomplishing national  
6 targets and to begin addressing the wide disparities in women's health. [2]

7  
8 The key to realizing equity in maternal health is the achievement of equity in key maternal health  
9 coverage, such as antenatal care and skilled birth attendance. A previous study indicated the  
10 greatest inequity in SBA coverage followed by ANC of more than four visits. [3] Wide  
11 inequalities in these interventions have significantly hindered the reduction by 0.75, the maternal  
12 mortality indicated target in the Millennium Development Goal 5 ratio from 1990 to 2015. [4 –  
13 6] This situation has prompted urgent and concerted efforts at both international and local levels  
14 to ensure access to SBA and ANC for all women irrespective of socioeconomic position through  
15 equity-oriented policies and actions.

16  
17 The Philippines has made significant efforts to improve women's health as mandated in its  
18 constitution and as a signatory to several women's international conventions including the  
19 Millennium Development Goals. National laws passed includes the Magna Carta of Women (RA  
20 9710), Maternity Benefits in Favor of Women Workers in the Private Sector (RA 7322), and  
21 Maternal Package for Normal Spontaneous Vaginal Delivery of the Philippine Health Insurance  
22 Corporation (Phil Health). Starting in the 1990s, Philippine government has also implemented a  
23 number of maternal health programs, including two Women's Health and Safe Motherhood

1  
2  
3 1 Projects (WHSM). Health system reforms to reduce maternal and neonatal mortality were also  
4  
5 2 spearheaded through the Department of Health Administrative Order No. 2008-0029 resulting to  
6  
7 3 the Integrated Maternal, Neonatal and Child Health and Nutrition Strategy (MNCHN). Specific  
8  
9 4 reproductive health indicators of MNCHN to be met in 2010 include (1) an increase in modern  
10  
11 5 contraceptive prevalence rate (CPR) to 60%, (2) an increase in the proportion of pregnant  
12  
13 6 women having at least four ANC visits to 80%, (3) and an increase in SBA and facility-based  
14  
15 7 births to 80%.  
16  
17  
18  
19  
20  
21

22 9 There is, however, uncertainty regarding whether and how these maternal health policies and  
23  
24 10 programs have substantially reduced gaps in the use of key maternal interventions among women  
25  
26 11 from varying socioeconomic backgrounds through time. The Philippines is currently off track  
27  
28 12 and slow in achieving Millennium Development Goal 5 (MDG-5). In 2010, the estimated  
29  
30 13 maternal mortality rate was 99 per 100000 live births, compared to the goal of 52 per 100000  
31  
32 14 live births in 2015. [7] This slow achievement of national targets suggests wide disparities in use  
33  
34 15 of maternal health interventions. A study in 2003 indicated wide economic and regional  
35  
36 16 inequalities in maternal and child health services, as well as differing patterns of use and  
37  
38 17 concentration of services according to living conditions. [8] The objectives of the present study  
39  
40 18 were to examine trends of inequality in antenatal (ANC), skilled birth attendance (SBA), and  
41  
42 19 delivery in medical facility (MEDFAC) in the Philippines between 1993 and 2008 according to  
43  
44 20 women's living conditions and socio demographic characteristics.  
45  
46  
47  
48  
49  
50  
51  
52  
53  
54  
55  
56  
57  
58  
59  
60



## 1 DATA AND METHODS

### 2 Data Source

3  
4 This study was performed using data from the Philippines Demographic and Health Survey  
5 (PDHS) conducted for the periods of 1993, 1998, 2003, and 2008. All were nationally  
6 representative household surveys overseen by the National Statistics Office and National  
7 Steering Committee with financial and technical support from the United States Agency for  
8 International Development. [9] PDHS gathers detailed information on population, health, and  
9 nutrition to assist in the country's monitoring and impact evaluation. It ensures comparability  
10 across countries and time by developing standard model questionnaires, extensive survey  
11 procedures, interviewer training, and data processing guidelines. [10, 11]

12  
13 The 1993 and 1998 PDHS employed a two-stage sample design, representing 14 regions and 16  
14 regions, respectively. A sample of 13700 households (response rate: 99.2%) was randomly  
15 selected from 750 primary sampling units (PSUs) for 1993 and a sample of 13708 households  
16 (response rate: 98.7%) was randomly selected from 755 primary sampling units (PSUs) for 1998.  
17 The 2003 and 2008 PDHS followed a stratified three-stage cluster sample design representing 17  
18 regions. A sample of 13914 households (response rate: 99.1%) was randomly selected from 819  
19 primary sampling units (PSUs) for 2003 and a sample of 13764 households (response rate:  
20 99.3%) was randomly selected from 794 primary sampling units for 2008. Detailed descriptions  
21 of the study design and methods of data collection are accessible online in household survey  
22 reports. [12 – 15]

1  
2  
3 1  
4  
5  
6 2 **Subjects**  
7  
8 3  
9  
10 4 The numbers of eligible women interviewed were as follows: 1993,  $n = 15029$ ; 1998,  $n = 13983$ ;  
11 5 2003,  $n = 13633$ ; and 2008,  $n = 13594$ . The average response rate was 98%. The Household  
12 6 Questionnaire was used to identify women and men eligible for the interview in the household  
13 7 surveys. The unit of analysis was women aged 15 – 49 years limited to those who had a live birth  
14 8 within one year, resulting in final sample sizes of 1707 in 1993, 1513 in 1998, 1325 in 2003, and  
15 9 1209 in 2008. The subjects were limited to those with a live birth within one year. This was done  
16 10 to standardize the varying information on the children born in the last five years, which ranged  
17 11 from information on the last birth, next to last birth, second from last birth (1993 and 2008), and  
18 12 last birth only (2003).  
19  
20  
21  
22  
23  
24  
25  
26  
27  
28  
29  
30  
31  
32 13  
33  
34  
35 14 **Study variables**  
36  
37 15  
38  
39  
40 16 Three dependent variables were measured in the present study: (1) at least four antenatal  
41 17 consultations; (2) assistance by professional health personnel during delivery—either a doctor,  
42 18 nurse, or midwife, but excluding traditional birth attendants (*hilot*), relatives, or friends; and (3)  
43 19 whether the birth occurred at home or in a medical facility (public or private).  
44  
45  
46  
47  
48  
49 20  
50  
51  
52 21 Of specific interest is computation of the living condition quintile (LCQ) to reflect the relative  
53 22 living conditions of women and adjust for variables related to socioeconomic status in all  
54  
55  
56  
57  
58  
59  
60

1 household survey years. Variables included in the LCQ calculation were source of drinking  
2 water, type of toilet facility, access to electricity, ownership of a television, refrigerator,  
3 bicycle/trisikad, motorcycle/scooter, car/truck, and main flooring material. LCQ was categorized  
4 into five levels ranging from 1 = poorly equipped to 5 = well equipped.

5  
6 Other independent variables were type of residence (urban or rural), woman's age (< 20, 20 – 29,  
7 30 – 39, ≥ 40), birth order (1, 2, 3, ≥ 4), and educational level of woman and her partner (none,  
8 primary, secondary, higher).

## 10 **Ethical Review**

11  
12 As protocols for all demographic health household surveys, the four PDHS were submitted for  
13 ethical review to the ICF Institutional Review Board (Calverton, MD) and an institutional review  
14 board or ethics review panel in the Philippines for approving research studies on human subjects.  
15 [16]

## 17 **Statistical Analysis**

18  
19 The LCQ was constructed by principal component analysis on combined PDHS data sets (1993,  
20 1998, 2003, and 2008) using STATA factor analysis. The five LCQ quintiles were drawn from  
21 the first principal component. [17, 18]

1  
2  
3 1  
4  
5  
6 2 Changes in the socio demographic profile and use of ANC, SBA, and MEDFAC of the  
7  
8 3 population were analyzed from household survey data in 1993, 1998, 2003, and 2008. Tests for  
9  
10 4 trends were performed using the Mantel–Haenszel linear-by-linear association chi squared test.  
11  
12 5 Crude and adjusted odds ratios between each dependent variable and all of the independent  
13  
14 6 variables were assessed by multivariate logistic regression analysis. Complex household survey  
15  
16 7 design was taken into account in all analyses using a sampling weight. All the missing data were  
17  
18 8 excluded in the analysis. All analyses were performed using StataMP 11 Statistical Software  
19  
20  
21 9 (Stata Corp., College Station, TX).  
22  
23  
24  
25  
26

27 11 Inequalities of each outcome variable according to the living condition quintile were estimated  
28  
29 12 using the concentration index. A measure similar to the GINI coefficient, defined as twice the  
30  
31 13 area between the concentration curve and the line of inequality, was used to determine the  
32  
33 14 magnitude of inequality; the result varied from  $-1$  to  $+1$  where values closer to 0 or 1 indicate a  
34  
35 15 greater or lesser degree of equality in the distribution of maternal health service utilization,  
36  
37 16 respectively. [19, 20]  
38  
39  
40  
41  
42  
43  
44 18  
45  
46  
47  
48  
49  
50  
51  
52  
53  
54  
55  
56  
57  
58  
59  
60

1  
2  
3  
4 1 **RESULTS**  
5  
6  
7

8 2  
9

10  
11 3 Table 1 shows the changes in socio demographic profile of the population from 1993 to 2008.  
12

13  
14 4 The percentage of women with secondary and higher education increased during this period. A  
15

16 5 corresponding increase was also observed in the percentage of partners who finished secondary  
17

18 6 and higher education. The proportion of the population with well-equipped living conditions  
19

20  
21 7 increased dramatically by almost half between 1993 and 2008.  
22

23 8  
24  
25  
26  
27  
28  
29  
30  
31  
32  
33  
34  
35  
36  
37  
38  
39  
40  
41  
42  
43  
44  
45  
46  
47  
48  
49  
50  
51  
52  
53  
54  
55  
56  
57  
58  
59  
60

**Table 1** Socio-demographic characteristics and childbirth history of women aged 15-49 years, per survey year, Philippines, 1993-2008

| Indicator                        | 1993<br>n=1707<br>% | 1998<br>n=1513<br>% | 2003<br>n=1325<br>% | 2008<br>n=1209<br>% | p Value* |
|----------------------------------|---------------------|---------------------|---------------------|---------------------|----------|
| <b>Residence</b>                 |                     |                     |                     |                     |          |
| Urban                            | 48.8                | 46.3                | 50.0                | 46.9                | 0.192    |
| Rural                            | 51.2                | 53.7                | 50.0                | 53.1                |          |
| <b>Woman's Education</b>         |                     |                     |                     |                     |          |
| None                             | 2.3                 | 1.8                 | 1.9                 | 1.2                 | <0.001   |
| Primary                          | 39.0                | 29.9                | 27.8                | 24.2                |          |
| Secondary                        | 37.4                | 39.7                | 42.5                | 50.3                |          |
| Higher                           | 21.3                | 28.6                | 27.8                | 24.3                |          |
| <b>Partner's Education</b>       |                     |                     |                     |                     |          |
| None                             | 1.9                 | 1.6                 | 2.0                 | 1.9                 | <0.001   |
| Primary                          | 40.8                | 33.4                | 31.8                | 27.5                |          |
| Secondary                        | 37.3                | 36.7                | 40.1                | 45.0                |          |
| Higher                           | 20.1                | 28.3                | 26.1                | 25.7                |          |
| <b>Living Condition Quintile</b> |                     |                     |                     |                     |          |
| 1 (Poorly equipped)              | 26.5                | 19.6                | 19.1                | 14.8                | <0.001   |
| 2                                | 24.8                | 20.0                | 16.2                | 15.4                |          |
| 3                                | 22.5                | 18.7                | 24.0                | 21.6                |          |
| 4                                | 14.1                | 18.1                | 19.7                | 22.2                |          |
| 5 (Well equipped)                | 12.1                | 23.6                | 21.0                | 26.0                |          |
| <b>Woman's Age</b>               |                     |                     |                     |                     |          |
| <20                              | 5.6                 | 6.1                 | 7.2                 | 8.2                 | 0.233    |
| 20-29                            | 53.7                | 53.7                | 53.3                | 53.5                |          |
| 30-39                            | 35.6                | 35.1                | 34.4                | 32.5                |          |
| ≥40                              | 5.2                 | 5.1                 | 5.1                 | 5.8                 |          |
| <b>Birth Order</b>               |                     |                     |                     |                     |          |
| 1                                | 22.6                | 24.5                | 27.7                | 28.5                | <0.001   |
| 2                                | 20.7                | 21.1                | 23.6                | 24.6                |          |
| 3                                | 16.8                | 19.6                | 15.5                | 15.2                |          |
| ≥4                               | 39.9                | 34.8                | 33.2                | 31.7                |          |

\* Calculated by chi-square test.

1 On the other hand, the distribution of household assets varied significantly across living  
2 condition quintiles. Approximately half (53.2%) of poorly equipped women had wells as their  
3 source of drinking water, and 27.1% have unsafe sources, such as springs, rivers, and tanker  
4 trucks. The majority of the poorly equipped women had substandard or no toilet facilities  
5 (65.6%), such as bucket toilets, drop/hanging toilets, and open fields. None of the poorly  
6 equipped women had a refrigerator, car, or truck. The percentages of television, motorcycle, or  
7 scooter ownership were low among poorly equipped women, only 3.5% of whom had electricity  
8 (data shown in the supplementary data).

9  
10 There was a substantial increase in utilization of ANC from 53.4% in 1993 to 74.8% in 2008.  
11 However, there were limited changes in utilization of SBA and MEDFAC from 55.5% in 1993 to  
12 63.3% in 2008 and 30.7% in 1993 to 46.3% in 2008, respectively (data shown in the  
13 supplementary data).

14  
15 As shown in Table 2, from 1993 to 2008, the rates of utilization of ANC, SBA, MEDFAC were  
16 higher for women who were educated, better off, had well-equipped living conditions, resided in  
17 an urban area, and those with educated partners than among their poorer and less educated  
18 counterparts. The odds ratio of ANC use declined, but the odds ratio for SBA and MEDFAC  
19 were consistently high between 1993 and 2008.

**Table 2** Adjusted odd ratios of the association between living condition and socio-demographic characteristics and antenatal care, skilled birth attendance or delivery at medical facility of women age 15-49 years, Philippines, 1993(n=1707), 1998(n=1513), 2003(n=1325), 2008(n=1209)

| Indicator                     | Antenatal Care |            |        |            |        |            |        |            | Skilled Birth Attendance |             |        |            |        |            |        |            | Delivery at medical facility |            |           |            |        |            |           |            |
|-------------------------------|----------------|------------|--------|------------|--------|------------|--------|------------|--------------------------|-------------|--------|------------|--------|------------|--------|------------|------------------------------|------------|-----------|------------|--------|------------|-----------|------------|
|                               | 1993           |            | 1998   |            | 2003   |            | 2008   |            | 1993                     |             | 1998   |            | 2003   |            | 2008   |            | 1993                         |            | 1998      |            | 2003   |            | 2008      |            |
|                               | OR             | 95% CI     | OR     | 95% CI     | OR     | 95% CI     | OR     | 95% CI     | OR                       | 95% CI      | OR     | 95% CI     | OR     | 95% CI     | OR     | 95% CI     | OR                           | 95% CI     | OR        | 95% CI     | OR     | 95% CI     | OR        | 95% CI     |
| Residence                     |                |            |        |            |        |            |        |            |                          |             |        |            |        |            |        |            |                              |            |           |            |        |            |           |            |
| Urban                         | 1.41**         | 1.13, 1.76 | 1.65** | 1.24, 2.19 | 1.88** | 1.42, 2.49 | 1.10   | 0.80, 1.51 | 3.20**                   | 2.53, 4.05  | 3.58** | 2.66, 4.84 | 4.09** | 3.07, 5.47 | 3.09   | 2.25, 4.25 | 3.70**                       | 2.83, 4.85 | 2.73***   | 2.00, 3.71 | 2.32** | 1.74, 3.10 | 2.10***   | 1.55, 2.85 |
| Rural (Reference)             | 1              |            | 1      |            | 1      |            | 1      |            | 1                        |             | 1      |            | 1      |            | 1      |            | 1                            |            | 1         |            | 1      |            | 1         |            |
| Woman's Education             |                |            |        |            |        |            |        |            |                          |             |        |            |        |            |        |            |                              |            |           |            |        |            |           |            |
| None                          | 0.47           | 0.22, 1.03 | 0.45   | 0.15, 1.34 | 0.24** | 0.08, 0.69 | 0.06** | 0.01, 0.28 | 0.14**                   | 0.05, 0.43  | 0.47   | 0.16, 1.43 | 0.12** | 0.04, 0.38 | 0.49   | 0.11, 2.22 | 0.28                         | 0.06, 1.40 | 0.40      | 0.09, 1.79 | 0.06** | 0.01, 0.57 | 0.73      | 0.08, 6.79 |
| Primary                       | 0.45**         | 0.31, 0.65 | 0.41** | 0.26, 0.65 | 0.49** | 0.31, 0.76 | 0.28** | 0.16, 0.50 | 0.32**                   | 0.21, 0.50  | 0.45** | 0.27, 0.75 | 0.30** | 0.19, 0.48 | 0.45** | 0.27, 0.76 | 0.44**                       | 0.29, 0.65 | 0.37***   | 0.23, 0.61 | 0.32** | 0.21, 0.49 | 0.43*     | 0.26, 0.73 |
| Secondary                     | 0.59**         | 0.42, 0.84 | 0.58** | 0.39, 0.87 | 0.65*  | 0.44, 0.96 | 0.49** | 0.30, 0.80 | 0.52**                   | 0.35, 0.79  | 0.67   | 0.43, 1.05 | 0.45** | 0.29, 0.69 | 0.75   | 0.48, 1.18 | 0.56**                       | 0.39, 0.79 | 0.42***   | 0.29, 0.61 | 0.39** | 0.27, 0.56 | 0.74      | 0.50, 1.10 |
| Higher (Reference)            | 1              |            | 1      |            | 1      |            | 1      |            | 1                        |             | 1      |            | 1      |            | 1      |            | 1                            |            | 1         |            | 1      |            | 1         |            |
| Partner's Education           |                |            |        |            |        |            |        |            |                          |             |        |            |        |            |        |            |                              |            |           |            |        |            |           |            |
| None                          | 0.37*          | 0.15, 0.89 | 0.27*  | 0.08, 0.87 | 0.48   | 0.19, 1.22 | 0.56   | 0.20, 1.55 | 0.05**                   | 0.01, 0.38  | 0.01** | 0.00, 0.14 | 0.16** | 0.06, 0.44 | 0.03** | 0.00, 0.31 | 0.12                         | 0.01, 1.18 | (omitted) |            | 0.06*  | 0.01, 0.63 | (omitted) |            |
| Primary                       | 0.53**         | 0.37, 0.76 | 0.54** | 0.35, 0.84 | 0.58** | 0.38, 0.89 | 0.73   | 0.43, 1.25 | 0.51**                   | 0.34, 0.76  | 0.32** | 0.19, 0.52 | 0.43** | 0.28, 0.68 | 0.30** | 0.18, 0.50 | 0.31**                       | 0.21, 0.47 | 0.22***   | 0.14, 0.36 | 0.40** | 0.25, 0.62 | 0.32***   | 0.20, 0.52 |
| Secondary                     | 0.80           | 0.57, 1.12 | 0.65*  | 0.44, 0.96 | 0.70   | 0.48, 1.04 | 0.85   | 0.53, 1.35 | 0.69                     | 0.47, 1.01  | 0.62*  | 0.41, 0.94 | 0.61*  | 0.40, 0.93 | 0.55** | 0.36, 0.85 | 0.58**                       | 0.42, 0.82 | 0.42***   | 0.29, 0.60 | 0.61** | 0.42, 0.87 | 0.65*     | 0.46, 0.94 |
| Higher (Reference)            | 1              |            | 1      |            | 1      |            | 1      |            | 1                        |             | 1      |            | 1      |            | 1      |            | 1                            |            | 1         |            | 1      |            | 1         |            |
| Living Condition Quintile     |                |            |        |            |        |            |        |            |                          |             |        |            |        |            |        |            |                              |            |           |            |        |            |           |            |
| 1 (Poorly equipped)           | 1              |            | 1      |            | 1      |            | 1      |            | 1                        |             | 1      |            | 1      |            | 1      |            | 1                            |            | 1         |            | 1      |            | 1         |            |
| 2                             | 0.86           | 0.63, 1.17 | 1.56*  | 1.07, 2.27 | 0.93   | 0.62, 1.41 | 1.18   | 0.75, 1.85 | 1.12                     | 0.81, 1.55  | 0.83   | 0.56, 1.24 | 0.96   | 0.63, 1.45 | 0.76   | 0.47, 1.21 | 0.85                         | 0.56, 1.29 | 0.65      | 0.39, 1.11 | 0.98   | 0.61, 1.58 | 0.54*     | 0.30, 0.95 |
| 3                             | 1.05           | 0.76, 1.46 | 1.46   | 0.93, 2.30 | 1.22   | 0.84, 1.78 | 0.93   | 0.62, 1.40 | 1.88**                   | 1.31, 2.69  | 1.76*  | 1.12, 2.79 | 1.64*  | 1.10, 2.45 | 1.37   | 0.91, 2.08 | 1.23                         | 0.85, 1.78 | 1.38      | 0.85, 2.24 | 1.53*  | 1.00, 2.34 | 1.11      | 0.72, 1.71 |
| 4                             | 1.87**         | 1.21, 2.91 | 1.89** | 1.18, 3.01 | 0.92   | 0.60, 1.42 | 1.98** | 1.17, 3.35 | 2.74**                   | 1.63, 4.62  | 3.44** | 1.99, 5.96 | 1.95** | 1.20, 3.17 | 2.04** | 1.26, 3.30 | 1.94**                       | 1.22, 3.09 | 1.47      | 0.91, 2.38 | 1.91** | 1.24, 2.95 | 1.39      | 0.90, 2.17 |
| 5 (Well equipped) (Reference) | 2.78**         | 1.64, 4.71 | 2.50** | 1.47, 4.28 | 2.33** | 1.36, 3.98 | 1.90*  | 1.05, 3.44 | 5.84**                   | 2.77, 12.34 | 4.32** | 2.24, 8.33 | 3.03** | 1.72, 5.36 | 4.25** | 2.31, 7.83 | 3.70**                       | 2.22, 6.18 | 2.14**    | 1.30, 3.53 | 2.42** | 1.54, 3.78 | 2.68***   | 1.64, 4.38 |
| Woman's Age                   |                |            |        |            |        |            |        |            |                          |             |        |            |        |            |        |            |                              |            |           |            |        |            |           |            |
| <20                           | 0.90           | 0.56, 1.45 | 0.53*  | 0.31, 0.90 | 0.94   | 0.55, 1.59 | 0.98   | 0.56, 1.71 | 1.04                     | 0.62, 1.73  | 0.69*  | 0.38, 1.23 | 0.92   | 0.55, 1.55 | 0.74   | 0.42, 1.33 | 0.93                         | 0.49, 1.75 | 0.89      | 0.42, 1.87 | 0.75   | 0.44, 1.26 | 0.56      | 0.29, 1.10 |
| 20-29 (Reference)             | 1              |            | 1      |            | 1      |            | 1      |            | 1                        |             | 1      |            | 1      |            | 1      |            | 1                            |            | 1         |            | 1      |            | 1         |            |
| 30-39                         | 1.36*          | 1.04, 1.78 | 1.85** | 1.31, 2.60 | 1.32   | 0.95, 1.83 | 1.41   | 0.98, 2.02 | 1.28                     | 0.95, 1.73  | 1.54   | 1.07, 2.21 | 1.44*  | 1.00, 2.08 | 1.61** | 1.09, 2.36 | 1.39*                        | 1.00, 1.92 | 1.35      | 0.91, 2.00 | 1.41*  | 1.00, 2.01 | 1.72*     | 1.16, 2.54 |
| ≥40                           | 1.48           | 0.87, 2.50 | 1.50   | 0.83, 2.71 | 0.96   | 0.52, 1.80 | 0.79   | 0.42, 1.49 | 2.09**                   | 1.18, 3.69  | 1.55   | 0.81, 2.96 | 1.08   | 0.53, 2.23 | 2.59** | 1.25, 5.38 | 2.01*                        | 1.03, 3.93 | 2.05      | 0.98, 4.26 | 1.07   | 0.47, 2.45 | 2.89*     | 1.46, 5.72 |
| Birth Order                   |                |            |        |            |        |            |        |            |                          |             |        |            |        |            |        |            |                              |            |           |            |        |            |           |            |
| 1 (Reference)                 | 1              |            | 1      |            | 1      |            | 1      |            | 1                        |             | 1      |            | 1      |            | 1      |            | 1                            |            | 1         |            | 1      |            | 1         |            |
| 2                             | 0.87           | 0.62, 1.23 | 1.12   | 0.74, 1.71 | 0.91   | 0.61, 1.36 | 0.94   | 0.58, 1.53 | 0.97                     | 0.66, 1.42  | 0.72   | 0.47, 1.11 | 0.98   | 0.63, 1.52 | 0.99   | 0.63, 1.56 | 0.65*                        | 0.43, 0.96 | 0.62*     | 0.39, 0.98 | 0.63*  | 0.42, 0.95 | 0.61*     | 0.40, 0.93 |
| 3                             | 0.70           | 0.48, 1.02 | 0.73   | 0.46, 1.16 | 1.03   | 0.65, 1.64 | 0.64   | 0.38, 1.10 | 0.65*                    | 0.43, 1.00  | 0.98   | 0.62, 1.56 | 0.84   | 0.50, 1.39 | 0.71   | 0.42, 1.21 | 0.43**                       | 0.27, 0.68 | 0.85      | 0.51, 1.42 | 0.57*  | 0.36, 0.90 | 0.42***   | 0.26, 0.69 |
| ≥4                            | 0.45**         | 0.32, 0.65 | 0.43** | 0.27, 0.67 | 0.56** | 0.35, 0.88 | 0.61   | 0.36, 1.05 | 0.59**                   | 0.40, 0.88  | 0.38** | 0.24, 0.61 | 0.60*  | 0.36, 0.98 | 0.45** | 0.26, 0.77 | 0.37**                       | 0.24, 0.57 | 0.47**    | 0.28, 0.79 | 0.35** | 0.22, 0.56 | 0.21***   | 0.12, 0.35 |

\* p<0.05; \*\* p<0.01; \*\*\* p<0.001

Adjusted for residence, woman's education, partner's education, women' age and birth order



1 Figure 1 shows that there was a marked reduction in inequality of ANC use from 1993 to 2008.  
2 Although gradients of ANC use among women with no education and women with higher  
3 education widened from 1993 to 2008, the gradients of ANC use among women with primary  
4 education and women with higher education decreased from a difference of 40.4% in 1993 to  
5 31.6% in 2008. The gulf between women with partners who had no education and those whose  
6 partners had higher education levels also decreased, with a difference of 54.4% in 1993 to 50.0%  
7 in 2008. A marked reduction was seen among women in the well-equipped living conditions  
8 quintile compared to those in the poorly equipped living conditions quintile, with a difference of  
9 48.0% in 1993 decreasing to 32.9% in 2008. A considerable decline in the concentration index  
10 computed for the living condition quintile was observed from 1993 to 2008.

11

1 **Figure 1** Trends in the percentage of antenatal care use by (a) woman's education, (b) partner's  
 2 education and (c) living condition quintile, 1993-2008

3 Part a: -◆- None, -■- Primary, ···▲·· Secondary, -×- Higher

4 Part b: -◆- None, -■- Primary, ···▲·· Secondary, -×- Higher

5 Part c: -◆- 1 (Poorly equipped), -■- 2, -▲- 3, ···×··· 4, -×- 5 (Well equipped)

6 Note: Concentration index was 0.18 (Standard Error: 0.013) in 1993; 0.18 (Standard Error:  
 7 0.013) in 1998; 0.12 (Standard Error: 0.012) in 2003; 0.09 (Standard Error: 0.010) in 2008

8

9

1  
2  
3 1 Figure 2 shows the limited changes in the inequality of SBA from 1993 to 2008. A reduction was  
4  
5  
6 2 observed in the gradient of SBA in comparison between women with no education and those  
7  
8 3 with higher education with a difference of 76.6% in 1993 decreasing to 70.7% in 2008. In  
9  
10 4 contrast, the gradient widened between women with partners who had no education and those  
11  
12 5 whose partners had higher education levels, with a difference of 80.4 % in 1993 increasing to  
13  
14 6 84.9% in 2008. The same trend was also observed among women in the well-equipped living  
15  
16 7 condition quintile compared to those in the poorly equipped living condition quintile, with a  
17  
18 8 difference of 69.4% in 1993 increasing to 72.5% in 2008. The concentration index for living  
19  
20 9 condition quintile did not show consistent trends and remained at the same level from 1993 to  
21  
22  
23  
24 10 2008.  
25  
26  
27 11

1 **Figure 2** Trends in the percentage of skilled birth attendance by woman's education (a),  
2 partner's education (b) and living condition quintile (c), 1993-2008

3 Part a: -◆- None, -■- Primary, ···▲·· Secondary, -×- Higher

4 Part b: -◆- None, -■- Primary, ···▲·· Secondary, -×- Higher

5 Part c: -◆- 1 (Poorly equipped), -■- 2, -▲- 3, ···×··· 4, -×- 5 (Well equipped)

6 Note: Concentration index was 0.26 (Standard Error: 0.013) in 1993; 0.28 (Standard Error:  
7 0.012) in 1998; 0.22 (Standard Error: 0.013) in 2003; 0.24 (Standard Error: 0.013) in 2008

8

1  
2  
3 1 Figure 3 shows the changes in inequality of MEDFAC from 1993 to 2008. As shown in the  
4  
5  
6 2 figure, the gradient of MEDFAC between women with no education and those with higher  
7  
8 3 education widened from a difference of 60.4% in 1993 to 67.0% in 2008. The gradient between  
9  
10 4 women with partners who had no education and those whose partners had higher education  
11  
12 5 levels also widened, with a difference of 60.1% in 1993 increasing to 74.4% in 2008. The gulf  
13  
14 6 between women in the well-equipped living condition quintile and those in the poorly equipped  
15  
16 7 living condition quintile also widened, with a difference of 65.5% in 1993 increasing to 70.1% in  
17  
18 8 2008. Similar to SBA, the concentration index computed for the living condition quintile from  
19  
20 9 1993 to 2008 remained at the same level.  
21  
22  
23  
24  
25 10  
26  
27  
28  
29  
30  
31  
32  
33  
34  
35  
36  
37  
38  
39  
40  
41  
42  
43  
44  
45  
46  
47  
48  
49  
50  
51  
52  
53  
54  
55  
56  
57  
58  
59  
60

1 **Figure 3** Trends in the percentage of delivery at medical facility by woman's education (a),  
2 husband's education (b) and living condition quintile (c), 1993-2008

3 Part a: -◆- None, -■- Primary, ···▲·· Secondary, -×- Higher

4 Part b: -◆- None, -■- Primary, ···▲·· Secondary, -×- Higher

5 Part c: -◆- 1 (Poorly equipped), -■- 2, -▲- 3, ···×··· 4, -×- 5 (Well equipped)

6 Note: Concentration index was 0.41 (Standard Error: 0.016) in 1993; 0.41 (Standard Error:  
7 0.017) in 1998; 0.34 (Standard Error: 0.017) in 2003; 0.34 (Standard Error: 0.015) in 2008

8

## 1 DISCUSSION

2  
3  
4  
5  
6  
7  
8 This is the first study to describe the time trends in the inequalities of maternal health care  
9  
10 utilization in the Philippines. The analysis of four nationally representative PDHS survey data  
11  
12 sets ranging over a period of 16 years showed substantial increase in antenatal coverage and  
13  
14 limited improvement in professional and institutional delivery care. Furthermore, findings  
15  
16 demonstrated significant reduction in the inequality of ANC use through time suggesting  
17  
18 substantial coverage of women in the lower living condition quintile. The study also provided  
19  
20 evidence of persistence of extreme inequality in SBA and MEDFAC indicating minimal  
21  
22 professional delivery care among women under poorly equipped living conditions.  
23  
24  
25  
26  
27  
28

29 The main strength of this study is the representativeness of the four PDHS surveys to the whole  
30  
31 population. A national sample of women aged 15-49 years were collected obtaining a sufficient  
32  
33 sample sizes for each survey year. PDHS followed a strict data quality checks through pre testing,  
34  
35 translation of questionnaires to local dialect, interviewer training, and double data entry. It also  
36  
37 employed standardized questionnaire format which are comparable between countries and are  
38  
39 carefully developed to ascertain accurate response and information from the participants. (10, 11)  
40  
41  
42  
43  
44

45 In the evaluation of results, some limitations should be considered. First, the number of subjects  
46  
47 was limited to live birth within one year which was approximately 0.1 of the original sample.  
48  
49 Though this was done to standardize varying sample size per data year, it reduced accuracy and  
50  
51 increased potential for error. Second, computation of Living Condition Quintile was based on a  
52  
53 limited set of variables. This was done to standardize the different information provided for the  
54  
55  
56  
57  
58  
59  
60

1  
2  
3 1 variables in each survey year. It is recommended to include more indicators to precisely describe  
4  
5  
6 2 the living conditions of women.  
7  
8  
9 3

10 4 Findings from in India reported that both ANC and SBA have low use among poor women  
11  
12 5 through time. [21] Evidence on 25 low income countries indicated huge inequalities on  
13  
14 6 institutional delivery rates and indicated a weak health system and lack of skilled birth workers  
15  
16 7 as the main barriers of use. [22] Marked underutilization of SBA has been noted among poor  
17  
18 8 women in many studies. [23-24]  
19  
20  
21 9

22  
23  
24 10 The total proportion of antenatal coverage increased compare to the total proportion of births  
25  
26 11 attended by skilled health personnel and delivery at a medical facility from 1993 to 2008. Over  
27  
28 12 the last several decades, the Philippine government has launched maternal health projects and  
29  
30 13 programs to improve women's health. These were implemented alongside extensive health  
31  
32 14 system reforms across the country on health financing, health regulation, health service delivery,  
33  
34 15 and good governance in health following decentralization of health care services. [25] A recent  
35  
36 16 study indicated that implementation areas that have intensively adopted the health system-wide  
37  
38 17 reforms have improved overall maternal health outcomes compared to those that did not.  
39  
40 18 However, the poorly developed health information systems and lack of referral emergency care  
41  
42 19 facilities in remote coastal and isolated mountain communities were noted as challenges that  
43  
44 20 remain to be addressed. [26]  
45  
46  
47  
48  
49  
50  
51 21

52  
53 22 The results of the present study indicated significant reductions in the inequality of ANC use.  
54  
55 23 This translates to substantial ANC use among women under poorly equipped living conditions.  
56  
57  
58  
59  
60



1 This can be explained by improvements in both the health care system and in the socio  
2 demographic profile of the population. The Phil Health has been reported to increase uptake and  
3 standards of ANC. Improvements in the quality of services in health care institutions through  
4 accreditation and the covering of financial costs by insurance contributed to the increased use of  
5 ANC by Filipino women regardless of socio demographic status. [27, 28] There was also an  
6 increase in the total number of midwives and rural (*barangay*) health units through the years,  
7 which addressed the problems of distance and lack of availability of health workers and ANC  
8 facilities. [29] Moreover, positive changes in sociodemographic and demographic profiles, such  
9 as increases in educational status of women and their partners, better living conditions of women,  
10 and decreased fertility, may also explain the observed reductions in the inequality of ANC use.  
11 [30]

12  
13 Extreme inequalities in SBA and MEDFAC persist in the Philippines despite health system-wide  
14 efforts and improvements in the socio demographic profile of the population. After 16 years, the  
15 majority of Filipino women from poorly equipped living conditions continue to deliver at home  
16 without professional assistance. In the Philippines, financial, transportation, companion to health  
17 facility, high burden of health workers, and congestion in large hospitals are major barriers that  
18 must be addressed to increase the rate of hospital delivery. The majority of unskilled home  
19 deliveries among Filipino women occur near hospitals, and financial burden associated with  
20 hospital delivery is the main concern regardless of socioeconomic status. [31] In 2009, the  
21 families in the bottom 30% income group spent more than they earned, with average figures of  
22 Php 64000 (approx. US\$1,535.50) and Php 62000 (approx. US\$1,487.47), respectively. The  
23 minimum cost of a normal single delivery in secondary, tertiary, and private health care

1 institutions are Php 4071 (approx. US\$97.69), Php 5316 (approx. US\$127.57), and Php 15040  
2 (approx. US\$360.77), respectively. [32, 33] In families from the lowest 30% income group,  
3 delivery at a hospital would consume a minimum of 6.6% – 24.3% of the family's total annual  
4 income. This indicates that catastrophic financial costs are responsible for the decision by poorer  
5 Filipino women to deliver at home, even if they are close to health facilities. Furthermore, of  
6 total health spending, out-of-pocket payments by patients continue to increase from 40% in 2000  
7 to 54% in 2010, and Phil Health coverage is low. [34] Internal armed conflicts are also pervasive  
8 in some regions in the Philippines, where rates of literacy and human development are lowest  
9 and poverty rates are high. An exploratory study revealed scarcity of staff and funds and  
10 disruption of maternal health services because of military, rebel, and political or clan conflicts.  
11 [35]

12  
13 Our study implies the need to research solutions to reduce inequality in SBA and delivery at a  
14 medical facility, and to determine the factors responsible for the persistence of inequality in SBA  
15 and delivery at a medical facility as well as the inconsistencies in trends despite government and  
16 non-governmental efforts. Recognizing reproductive health as a basic right of women regardless  
17 of socio demographic status is important in formulating national policy and programs to address  
18 inequality in maternal health service utilization.

1  
2  
3  
4  
5  
6  
7  
8  
9  
10  
11  
12  
13  
14  
15  
16  
17  
18  
19  
20  
21  
22  
23  
24  
25  
26  
27  
28  
29  
30  
31  
32  
33  
34  
35  
36  
37  
38  
39  
40  
41  
42  
43  
44  
45  
46  
47  
48  
49  
50  
51  
52  
53  
54  
55  
56  
57  
58  
59  
60

1  
  
2  
  
3

For peer review only

1  
2  
3 1 **ACKNOWLEDGEMENTS**  
4

5 2  
6  
7  
8 3 We are thankful to MEASURE DHS for allowing us to analyze the 1993, 1998, 2003 and 2008  
9  
10 4 PDHS datasets. We also acknowledge with deepest thankfulness the organizations and  
11  
12 5 individuals in the Philippines who contributed to the 1993, 1998, 2003 and 2008 PDHS.  
13  
14  
15 6

16  
17 7 **COMPETING INTERESTS**  
18

19  
20 8 The authors declare that they have no competing interests.  
21  
22 9

23  
24 10 **FUNDING**  
25

26 11 This research received no specific grant from any funding agency in the public, commercial or  
27  
28 12 not-for-profit sectors.  
29  
30 13

31 14 **CONTRIBUTORSHIP**  
32

33  
34 15 FM and KN conceptualized and designed the study. FM obtained and FM and MK analyzed the  
35 16 data. FM, KN, MK, and KS interpreted the results of analysis. FM drafted an initial manuscript  
36 17 and FM, KN, MK, and KS structured and edited the manuscript. All authors approved the final  
37 18 manuscript.  
38  
39  
40 19

41  
42 20 **DATA SHARING**  
43

44 21 There are no additional unpublished data from the study.  
45  
46  
47  
48  
49  
50  
51  
52  
53  
54  
55  
56  
57  
58  
59  
60

## 1 REFERENCES

- 2 1. Commission on information and accountability for Women's and Children's Health.  
3 Keeping promises, measuring results. World Health Organization; 2011. Available from:  
4 [http://www.everywomaneverychild.org/images/content/files/accountability\\_commission/f](http://www.everywomaneverychild.org/images/content/files/accountability_commission/final_report/Final_EN_Web.pdf)  
5 [inal\\_report/Final\\_EN\\_Web.pdf](http://www.everywomaneverychild.org/images/content/files/accountability_commission/final_report/Final_EN_Web.pdf) (accessed March 2012).
- 6 2. Thomsen S, Hoa Dt, Målqvist M, et al. Promoting equity to achieve maternal and child  
7 health. *Reprod Health Matters* 2011;**19**(38):176-82.
- 8 3. Barros AJ, Ronsmans C, Axelson H, et al. Equity in maternal, newborn and child health  
9 interventions in countdown to 2015: a retrospective review of survey data from 54  
10 countries. *Lancet* 2012;**379**(9822):1225-33.
- 11 4. Zere E, Kirigia JM, Duale S, et al. Inequities in maternal and child health outcomes and  
12 interventions in Ghana. *BMC Public Health* 2012;**12**:252.
- 13 5. Wirth M, Sacks E, Delamonica E, et al. “Delivering on the mdgs?”:equity and maternal  
14 health in Ghana, Ethiopia and Kenya. *East Afr J Public Health* 2008;**5**(3):133-41.
- 15 6. Silal SP, Penn Kenana L, Harris B, et al. Exploring inequalities in access to and use of  
16 maternal health services in South Africa. *BMC Health Serv Res* 2012;**12**(1):120.
- 17 7. WHO, UNICEF, UNFPA, The World Bank. Trends in maternal mortality 1990-2010:  
18 WHO, UNICEF, UNFPA and The World Bank estimates. Geneva: World Health  
19 Organization; 2012. Available from:  
20 [http://www.unfpa.org/webdav/site/global/shared/documents/publications/2012/Trends\\_in](http://www.unfpa.org/webdav/site/global/shared/documents/publications/2012/Trends_in_maternal_mortality_A4-1.pdf)  
21 [\\_maternal\\_mortality\\_A4-1.pdf](http://www.unfpa.org/webdav/site/global/shared/documents/publications/2012/Trends_in_maternal_mortality_A4-1.pdf) (accessed March 2012).

- 1  
2  
3 1 8. Lavado RF, Lagrada LP. Are Maternal and Child Care Programs Reaching the Poorest  
4  
5 2 Regions in the Philippines? Philippine Institute for Developmental Studies. 2008 Nov;  
6  
7 3 Discussion Paper Series No. 2008-30.  
8  
9  
10 4 9. Demographic and Health Surveys [Internet]. Calverton: Macro International. Available  
11  
12 5 from: <http://www.measuredhs.com/> (accessed July 2011).  
13  
14  
15 6 10. Rutstein SO, Rojas G. Guide to DHS statistics. Calverton, MD: ORC Macro,2003.  
16  
17 7 11. Croft T. DHS Data Editing and Imputation. Calverton, MD: ORC Macro International.  
18  
19 8 12. National Statistics Office (NSO) [Philippines] and Macro International Inc. (MI).1994.  
20  
21 9 National Demographic Survey 1993. Calverton, Maryland: NSO and MI.  
22  
23 10 13. National Statistics Office (NSO)], Department of Health (DOH) [Philippines] and Macro  
24  
25 11 International Inc. (MI).1999. National Demographic Survey 1998. Manila: NSO and MI.  
26  
27 12 14. National Statistics Office (NSO) [Philippines], and ORC Macro. 2004. National  
28  
29 13 Demographic Survey 2003. Calverton, Maryland: NSO and ORC Macro.  
30  
31 14 15. National Statistics Office (NSO) [Philippines], and ICF Macro. 2009. National  
32  
33 15 Demographic Survey 2008. Calverton, Maryland: National Statistics Office and ICF  
34  
35 16 Macro.  
36  
37 17 16. ICF International. 2012. Survey Organization Manual for Demographic and Health  
38  
39 18 Surveys. MEASURE DHS. Calverton. Maryland: ICF International. Available from:  
40  
41 19 [http://www.measuredhs.com/pubs/pdf/DHSM10/DHS6\\_Survey\\_Org\\_Manual\\_28Feb201](http://www.measuredhs.com/pubs/pdf/DHSM10/DHS6_Survey_Org_Manual_28Feb2012.pdf)  
42  
43 20 [2.pdf](http://www.measuredhs.com/pubs/pdf/DHSM10/DHS6_Survey_Org_Manual_28Feb2012.pdf) (accessed July 2011).  
44  
45  
46 21 17. Coste J, Bouée S, Ecosse E, et al. Methodological issues in determining the  
47  
48 22 dimensionality of composite health measures using principal component analysis: case  
49  
50 23 illustration and suggestions for practice. *Quality of Life Research* 2005;**14**(3):641-54.  
51  
52  
53  
54  
55  
56  
57  
58  
59  
60

- 1  
2  
3 1 18. Vyas S, Kumaranayake L. Constructing socio-economic status indices: how to use  
4 principal components analysis. *Health Policy Plan* 2006;**21**(6):459-68.  
5  
6 2  
7  
8 3 19. O'Donnell O, van Doorslaer E, Wagstaff A, et al. Analyzing health equity using  
9 household survey data: a guide to techniques and their implementation. Washington, D.C:  
10 The World Bank; 2008. Available from:  
11  
12 5 The World Bank; 2008. Available from:  
13  
14 6 [http://siteresources.worldbank.org/INTPAH/Resources/Publications/459843-](http://siteresources.worldbank.org/INTPAH/Resources/Publications/459843-1195594469249/HealthEquityFINAL.pdf)  
15  
16 7 [1195594469249/HealthEquityFINAL.pdf](http://siteresources.worldbank.org/INTPAH/Resources/Publications/459843-1195594469249/HealthEquityFINAL.pdf) (accessed July 2011).  
17  
18  
19  
20 8 20. Wagstaff A. The concentration index of a binary outcome revisited. *J Health Econ*  
21  
22 9 2011;**20**(10):1155-60.  
23  
24  
25 10 21. Pathak PK, Singh A, Subramanian SV. Economic Inequalities in maternal health care:  
26 prenatal care and skilled birth attendance in India, 1992-2006. *PLoS One*  
27 11 2010;**5**(10):e13593.  
28  
29  
30  
31  
32 13 22. Limwattananon S, Tangcharoensathien V, Sirilak S. Trends and inequities in where  
33 women delivered their babies in 25 low-income countries: evidence from Demographic  
34 14 and Health Surveys. *Reprod Health Matters* 2011;**19**(37):75-85.  
35  
36  
37 15  
38  
39 16 23. Zere E, Oluwole D, Kirigia JM, et al. Inequalities in skilled attendance at birth in  
40 Namibia: a decomposition analysis. *BMC Pregnancy Childbirth* 2011;**11**:34.  
41 17  
42  
43  
44 18 24. Collin SM, Anwar I, Ronsmans C. A decade of inequality in maternity  
45 care: antenatal care, professional attendance at delivery, and caesarean section in  
46 19 Bangladesh (1991–2004). *Int J Equity Health* 2007 Aug;**6**:9.  
47  
48  
49 20  
50  
51 21 25. Lakshminarayanan, R. Decentralisation and its implications for reproductive health: the  
52 Philippines experience. *Reprod Health Matters* 2003;**11**(21):96-107.  
53 22  
54  
55  
56  
57  
58  
59  
60

- 1  
2  
3 1 26. Huntington D, Banzon E, Recidoro ZD. A systems approach to improving maternal  
4 health in the Philippines. *Bull World Health Organ* 2012;**90**(2):104-110.  
5  
6 2  
7  
8 3 27. Kozhimannil KB, Valera MR, Adams A, et al. The population-level impacts of a national  
9 health insurance program and franchise midwife clinics on achievement of prenatal and  
10 4 health insurance program and franchise midwife clinics on achievement of prenatal and  
11 delivery care standards in the Philippines. *Health Policy* 2009;**92**(1):55-64.  
12 5  
13 6 28. Quimbo SA, Peabody JW, Shimkhada R, et al. Should we have confidence if a physician  
14 is accredited? A study of the relative impacts of accreditation and insurance payments on  
15 7 quality of care in the Philippines. *Soc Sci Med* 2008;**67**(4):505-10.  
16 8  
17 9 29. Department of Health. Vital, Health and Nutrition. Manila; National Statistical  
18 10 Coordination Board; 2012. Available from: [http://www.nscb.gov.ph/secstat/d\\_vital.asp](http://www.nscb.gov.ph/secstat/d_vital.asp)  
19 11 (accessed Mar 2012).  
20 12 30. Simkhada B, Teijlingen ER, Porter M, et al. Factors affecting the utilization of antenatal  
21 13 in developing countries: a systematic review of the literature. *J Adv Nurs* 2008;**61**(3):244-  
22 14 60.  
23 15 31. Sobel HL, Oliveros YE, Nyunt US. Secondary analysis of a national health survey on  
24 16 factors influencing women in the Philippines to deliver at home and unattended by a  
25 17 healthcare professional. *Int J Gynaecol Obstet* 2010;**111**(2):157-60.  
26 18 32. Ericta CN. Families in the bottom 30 percent income group earned 62 thousand pesos in  
27 19 2009. Manila:National Statistics Office; 4 Feb 2011. Available from:  
28 20 <http://www.census.gov.ph/data/pressrelease/2011/ie09frtx.html> (accessed Mar 2012).  
29 21 33. Tsolmongerel T. Costing study for selected hospitals in the Philippines. March 2009  
30 22 Available from:  
31  
32  
33  
34  
35  
36  
37  
38  
39  
40  
41  
42  
43  
44  
45  
46  
47  
48  
49  
50  
51  
52  
53  
54  
55  
56  
57  
58  
59  
60



1  
2  
3 1 <http://www.doh.gov.ph/sites/default/files/Costing%20Study%20for%20Selected%20Hospitals%20in%20the%20Philippines.pdf> (accessed Mar 2012).

4  
5 2  
6  
7  
8 3 34. Global Health expenditure Database. Philippines National Expenditure on Health  
9  
10 4 (Philippine Peso) 1995-2010. World Health Organization; 2012. Available from:  
11  
12 5 [http://apps.who.int/nha/database/StandardReport.aspx?ID=REP\\_WEB\\_MINI\\_TEMPLATE\\_WEB\\_VERSION&COUNTRYKEY=84655](http://apps.who.int/nha/database/StandardReport.aspx?ID=REP_WEB_MINI_TEMPLATE_WEB_VERSION&COUNTRYKEY=84655) (accessed Mar 2012).

13  
14  
15 6  
16  
17 7 35. Lee R. Delivering maternal health care services in an internal conflict setting in  
18  
19 8 Maguindanao, Philippines. *Reprod Health Matters* 2008;**16**(5):65-74.

20  
21  
22  
23 9  
24  
25 10  
26  
27  
28  
29  
30  
31  
32  
33  
34  
35  
36  
37  
38  
39  
40  
41  
42  
43  
44  
45  
46  
47  
48  
49  
50  
51  
52  
53  
54  
55  
56  
57  
58  
59  
60

1  
2  
3  
4  
5  
6  
7  
8  
9  
10  
11  
12  
13  
14  
15  
16  
17  
18  
19  
20  
21  
22  
23  
24  
25  
26  
27  
28  
29  
30  
31  
32  
33  
34  
35  
36  
37  
38  
39  
40  
41  
42  
43  
44  
45  
46  
47  
48  
49  
50  
51  
52  
53  
54  
55  
56  
57  
58  
59  
60

Part a. Woman's education

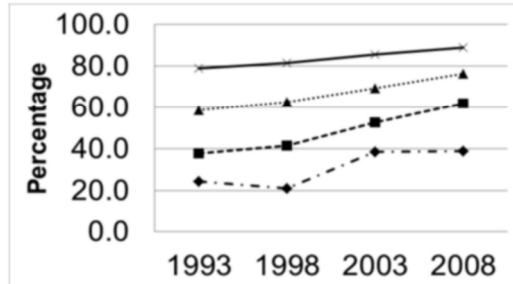

Part b. Partner's education

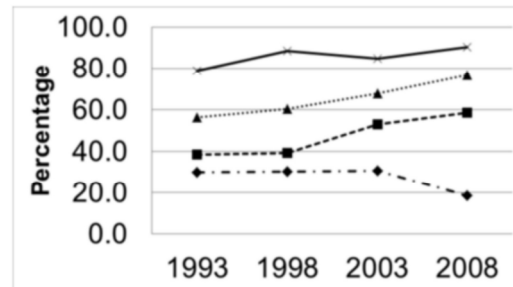

Part c. Living Condition Index

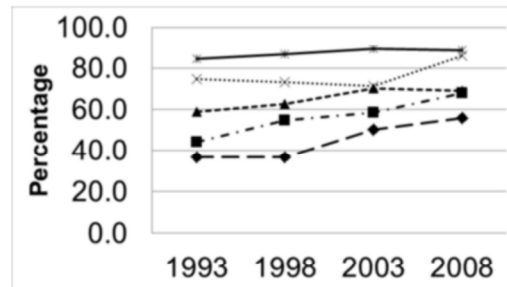

Figure 1 Trends in the percentage of antenatal care use by (a) woman's education, (b) partner's education and (c) living condition quintile, 1993-2008  
 Note: Concentration index was 0.18 (Standard Error: 0.013) in 1993; 0.18 (Standard Error: 0.013) in 1998; 0.12 (Standard Error: 0.012) in 2003; 0.09 (Standard Error: 0.010) in 2008

172x230mm (300 x 300 DPI)

1  
2  
3  
4  
5  
6  
7  
8  
9  
10  
11  
12  
13  
14  
15  
16  
17  
18  
19  
20  
21  
22  
23  
24  
25  
26  
27  
28  
29  
30  
31  
32  
33  
34  
35  
36  
37  
38  
39  
40  
41  
42  
43  
44  
45  
46  
47  
48  
49  
50  
51  
52  
53  
54  
55  
56  
57  
58  
59  
60

Part a. Woman's education

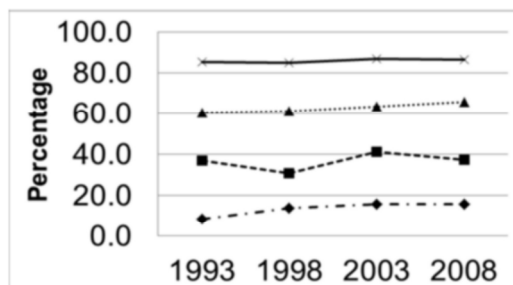

Part b. Partner's education

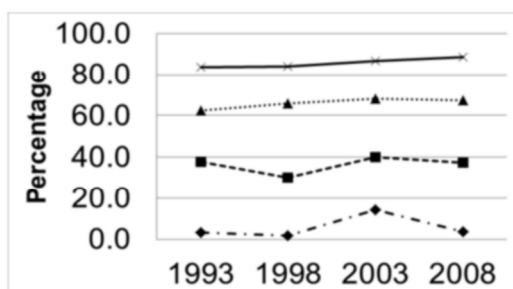

Part c. Living Condition Index

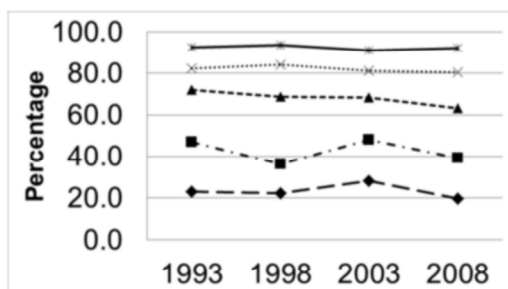

Figure 2 Trends in the percentage of skilled birth attendance by woman's education (a), partner's education (b) and living condition quintile (c), 1993-2008

Note: Concentration index was 0.26 (Standard Error: 0.013) in 1993; 0.28 (Standard Error: 0.012) in 1998; 0.22 (Standard Error: 0.013) in 2003; 0.24 (Standard Error: 0.013) in 2008  
172x230mm (300 x 300 DPI)

1  
2  
3  
4  
5  
6  
7  
8  
9  
10  
11  
12  
13  
14  
15  
16  
17  
18  
19  
20  
21  
22  
23  
24  
25  
26  
27  
28  
29  
30  
31  
32  
33  
34  
35  
36  
37  
38  
39  
40  
41  
42  
43  
44  
45  
46  
47  
48  
49  
50  
51  
52  
53  
54  
55  
56  
57  
58  
59  
60

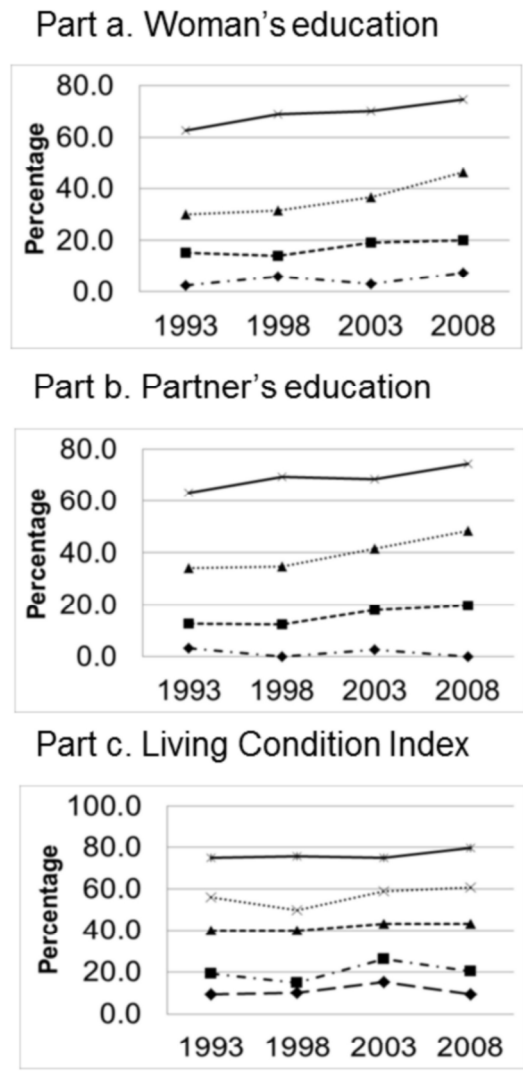

Figure 3 Trends in the percentage of delivery at medical facility by woman's education (a), husband's education (b) and living condition quintile (c), 1993-2008  
 Note: Concentration index was 0.41 (Standard Error: 0.016) in 1993; 0.41 (Standard Error: 0.017) in 1998; 0.34 (Standard Error: 0.017) in 2003; 0.34 (Standard Error: 0.015) in 2008

172x230mm (300 x 300 DPI)

## SUPPLEMENTARY DATA

**Table A** Household assets and living condition index of women aged 15-49 years, Philippines

| Household assets                          | Living Condition Index  |      |      |      |                       | Total       |
|-------------------------------------------|-------------------------|------|------|------|-----------------------|-------------|
|                                           | 1<br>Poorly<br>equipped | 2    | 3    | 4    | 5<br>Well<br>equipped |             |
| Source of drinking water (%) <sup>1</sup> |                         |      |      |      |                       |             |
| Piped                                     | 18.9                    | 43.5 | 58.6 | 69.9 | 84.5                  | <b>54.7</b> |
| Well                                      | 53.9                    | 46.3 | 35.2 | 24.6 | 13.3                  | <b>35.0</b> |
| Others                                    | 27.1                    | 10.2 | 6.2  | 5.5  | 2.2                   | <b>10.4</b> |
| Toilet Facility (%) <sup>2</sup>          |                         |      |      |      |                       |             |
| Flush type                                | 12.2                    | 58.8 | 81.4 | 94.7 | 98.9                  | <b>68.6</b> |
| Pit latrine                               | 22.2                    | 22.0 | 11.8 | 4.5  | 1.1                   | <b>12.5</b> |
| Others                                    | 65.6                    | 19.2 | 6.8  | 0.8  | 0.1                   | <b>18.9</b> |
| Main floor material (%) <sup>3</sup>      |                         |      |      |      |                       |             |
| Floor Material 1                          | 2.8                     | 17.8 | 47.4 | 77.9 | 95.3                  | <b>47.5</b> |
| Floor Material 2                          | 71.7                    | 65.3 | 42.5 | 19.4 | 4.7                   | <b>41.2</b> |
| Others                                    | 25.5                    | 16.9 | 10.1 | 2.8  | 0.1                   | <b>11.3</b> |
| Has electricity (%)                       | 3.5                     | 45.1 | 96.7 | 99.6 | 100.0                 | <b>68.6</b> |
| Has television (%)                        | 0.2                     | 7.6  | 56.1 | 94.0 | 99.8                  | <b>50.7</b> |
| Has refrigerator (%)                      | 0.0                     | 0.6  | 4.9  | 36.5 | 97.2                  | <b>27.2</b> |
| Has bicycle/ trisikad (%)                 | 2.9                     | 14.6 | 17.8 | 26.9 | 35.8                  | <b>19.4</b> |
| Has motorcycle/ scooter (%)               | 0.4                     | 2.4  | 4.0  | 17.2 | 31.9                  | <b>10.9</b> |
| Has car/truck (%)                         | 0.0                     | 0.2  | 0.3  | 1.7  | 26.1                  | <b>5.6</b>  |

<sup>1</sup> Piped - piped into dwelling, piped to yard plot, public tap/standpipe, bottled water; Well - tube well or borehole, protected well, unprotected well, semi-protected well; Others - protected spring, unprotected spring, river/dam/lake/ponds/stream/canal/irrig, rainwater, tanker truck, cart with small tank, neighbors tap(source unknown to others), neighbors tap (NAWASA), other

<sup>2</sup> Flush Type - flush toilet to piped sewer system, flush toilet to septic tank, flush toilet to pit latrine, flush toilet to somewhere else, flush (don't know where); Pit latrine - pit latrine (ventilated improve), pit latrine (with slab), pit latrine (without slab/open pit); Others - no facility/bush/field/river, composting toilet, bucket toilet, drop/hanging toilet, other

<sup>3</sup> Floor Material 1 - ceramic tiles, cement, carpet, marble; Floor Material 2 - wood planks, palm/bamboo, parquet(polished wood), vinyl/asphalt strips; Others - earth, sand, others

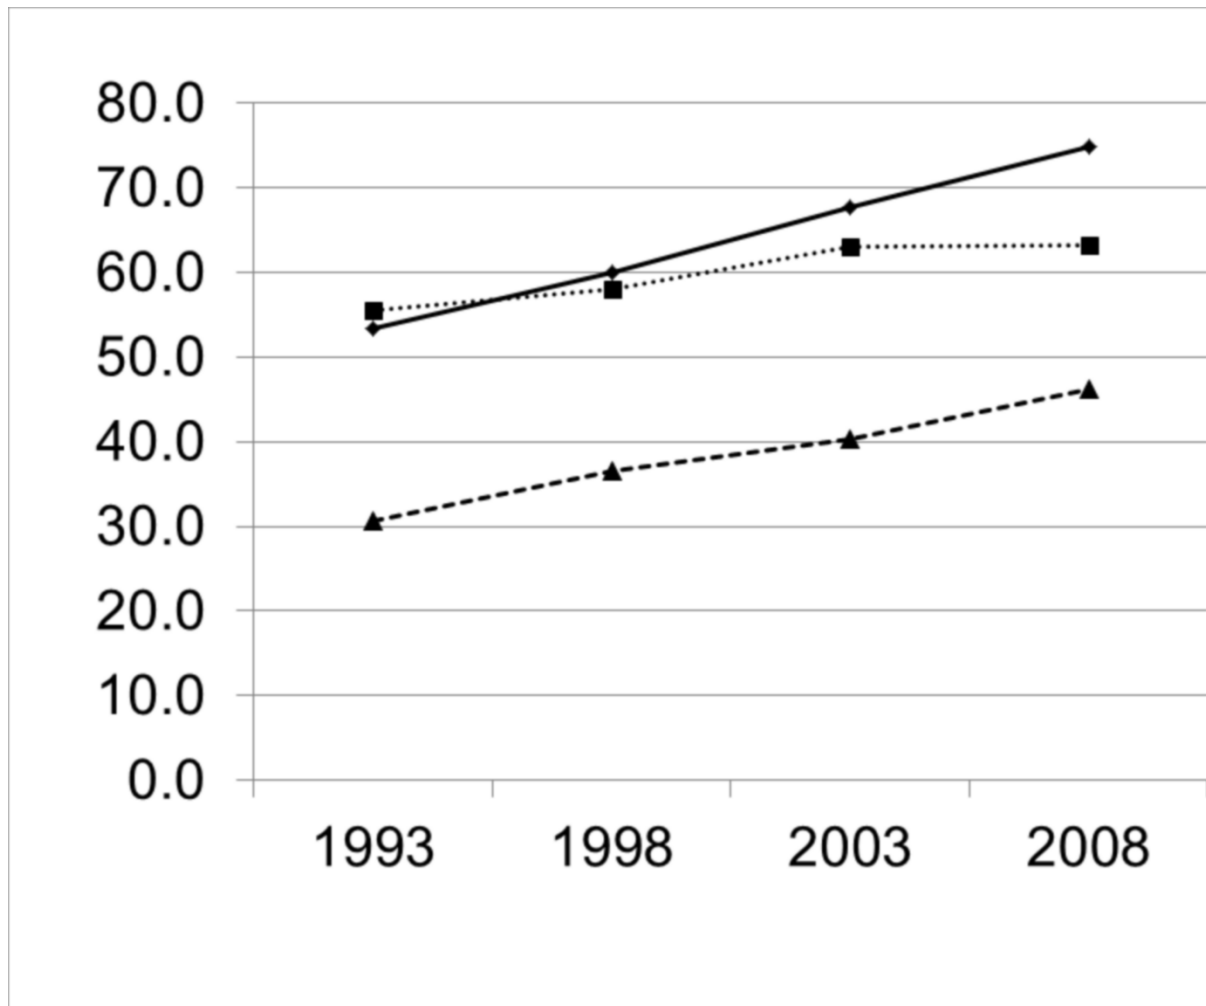

**Figure A** Total percentage of antenatal care use, skilled birth attendance and delivery in a medical facility, 1993-2008

—◆— Antenatal care, ···■··· Skilled birth attendance, -▲- Delivery at Medical Facility

**STROBE 2007 (v4) checklist of items to be included in reports of observational studies in epidemiology\***  
**Checklist for cohort, case-control, and cross-sectional studies (combined)**

| Section/Topic             | Item # | Recommendation                                                                                                                                                                                                                                                                                                                                                                                                                                                         | Reported on page # |
|---------------------------|--------|------------------------------------------------------------------------------------------------------------------------------------------------------------------------------------------------------------------------------------------------------------------------------------------------------------------------------------------------------------------------------------------------------------------------------------------------------------------------|--------------------|
| Title and abstract        | 1      | (a) Indicate the study's design with a commonly used term in the title or the abstract                                                                                                                                                                                                                                                                                                                                                                                 | 1                  |
|                           |        | (b) Provide in the abstract an informative and balanced summary of what was done and what was found                                                                                                                                                                                                                                                                                                                                                                    | 3                  |
| <b>Introduction</b>       |        |                                                                                                                                                                                                                                                                                                                                                                                                                                                                        |                    |
| Background/rationale      | 2      | Explain the scientific background and rationale for the investigation being reported                                                                                                                                                                                                                                                                                                                                                                                   | 7                  |
| Objectives                | 3      | State specific objectives, including any pre-specified hypotheses                                                                                                                                                                                                                                                                                                                                                                                                      | 8                  |
| <b>Methods</b>            |        |                                                                                                                                                                                                                                                                                                                                                                                                                                                                        |                    |
| Study design              | 4      | Present key elements of study design early in the paper                                                                                                                                                                                                                                                                                                                                                                                                                | 11                 |
| Setting                   | 5      | Describe the setting, locations, and relevant dates, including periods of recruitment, exposure, follow-up, and data collection                                                                                                                                                                                                                                                                                                                                        | 9                  |
| Participants              | 6      | (a) <i>Cohort study</i> —Give the eligibility criteria, and the sources and methods of selection of participants. Describe methods of follow-up<br><i>Case-control study</i> —Give the eligibility criteria, and the sources and methods of case ascertainment and control selection. Give the rationale for the choice of cases and controls<br><i>Cross-sectional study</i> —Give the eligibility criteria, and the sources and methods of selection of participants | 10                 |
|                           |        | (b) <i>Cohort study</i> —For matched studies, give matching criteria and number of exposed and unexposed<br><i>Case-control study</i> —For matched studies, give matching criteria and the number of controls per case                                                                                                                                                                                                                                                 |                    |
| Variables                 | 7      | Clearly define all outcomes, exposures, predictors, potential confounders, and effect modifiers. Give diagnostic criteria, if applicable                                                                                                                                                                                                                                                                                                                               | 10                 |
| Data sources/ measurement | 8*     | For each variable of interest, give sources of data and details of methods of assessment (measurement). Describe comparability of assessment methods if there is more than one group                                                                                                                                                                                                                                                                                   | 9                  |
| Bias                      | 9      | Describe any efforts to address potential sources of bias                                                                                                                                                                                                                                                                                                                                                                                                              | 12                 |
| Study size                | 10     | Explain how the study size was arrived at                                                                                                                                                                                                                                                                                                                                                                                                                              | 10                 |
| Quantitative variables    | 11     | Explain how quantitative variables were handled in the analyses. If applicable, describe which groupings were chosen and why                                                                                                                                                                                                                                                                                                                                           | 10                 |
| Statistical methods       | 12     | (a) Describe all statistical methods, including those used to control for confounding                                                                                                                                                                                                                                                                                                                                                                                  | 11                 |
|                           |        | (b) Describe any methods used to examine subgroups and interactions                                                                                                                                                                                                                                                                                                                                                                                                    | -                  |
|                           |        | (c) Explain how missing data were addressed                                                                                                                                                                                                                                                                                                                                                                                                                            | 12                 |
|                           |        | (d) <i>Cohort study</i> —If applicable, explain how loss to follow-up was addressed<br><i>Case-control study</i> —If applicable, explain how matching of cases and controls was addressed                                                                                                                                                                                                                                                                              | 12                 |

|                          |     |                                                                                                                                                                                                              |       |
|--------------------------|-----|--------------------------------------------------------------------------------------------------------------------------------------------------------------------------------------------------------------|-------|
|                          |     | <i>Cross-sectional study</i> —If applicable, describe analytical methods taking account of sampling strategy                                                                                                 |       |
|                          |     | (e) Describe any sensitivity analyses                                                                                                                                                                        |       |
| <b>Results</b>           |     |                                                                                                                                                                                                              |       |
| Participants             | 13* | (a) Report numbers of individuals at each stage of study—eg numbers potentially eligible, examined for eligibility, confirmed eligible, included in the study, completing follow-up, and analysed            | 10    |
|                          |     | (b) Give reasons for non-participation at each stage                                                                                                                                                         | 10    |
|                          |     | (c) Consider use of a flow diagram                                                                                                                                                                           | -     |
| Descriptive data         | 14* | (a) Give characteristics of study participants (eg demographic, clinical, social) and information on exposures and potential confounders                                                                     | 12,14 |
|                          |     | (b) Indicate number of participants with missing data for each variable of interest                                                                                                                          | -     |
|                          |     | (c) <i>Cohort study</i> —Summarise follow-up time (eg, average and total amount)                                                                                                                             |       |
| Outcome data             | 15* | <i>Cohort study</i> —Report numbers of outcome events or summary measures over time                                                                                                                          |       |
|                          |     | <i>Case-control study</i> —Report numbers in each exposure category, or summary measures of exposure                                                                                                         |       |
|                          |     | <i>Cross-sectional study</i> —Report numbers of outcome events or summary measures                                                                                                                           | 15    |
| Main results             | 16  | (a) Give unadjusted estimates and, if applicable, confounder-adjusted estimates and their precision (eg, 95% confidence interval). Make clear which confounders were adjusted for and why they were included | 16    |
|                          |     | (b) Report category boundaries when continuous variables were categorized                                                                                                                                    |       |
|                          |     | (c) If relevant, consider translating estimates of relative risk into absolute risk for a meaningful time period                                                                                             |       |
| Other analyses           | 17  | Report other analyses done—eg analyses of subgroups and interactions, and sensitivity analyses                                                                                                               | -     |
| <b>Discussion</b>        |     |                                                                                                                                                                                                              |       |
| Key results              | 18  | Summarise key results with reference to study objectives                                                                                                                                                     | 21    |
| Limitations              | 19  | Discuss limitations of the study, taking into account sources of potential bias or imprecision. Discuss both direction and magnitude of any potential bias                                                   | 21    |
| Interpretation           | 20  | Give a cautious overall interpretation of results considering objectives, limitations, multiplicity of analyses, results from similar studies, and other relevant evidence                                   | 22    |
| Generalisability         | 21  | Discuss the generalisability (external validity) of the study results                                                                                                                                        | -     |
| <b>Other information</b> |     |                                                                                                                                                                                                              |       |
| Funding                  | 22  | Give the source of funding and the role of the funders for the present study and, if applicable, for the original study on which the present article is based                                                | 25    |

\*Give information separately for cases and controls in case-control studies and, if applicable, for exposed and unexposed groups in cohort and cross-sectional studies.

**Note:** An Explanation and Elaboration article discusses each checklist item and gives methodological background and published examples of transparent reporting. The STROBE checklist is best used in conjunction with this article (freely available on the Web sites of PLoS Medicine at <http://www.plosmedicine.org/>, Annals of Internal Medicine at <http://www.annals.org/>, and Epidemiology at <http://www.epidem.com/>). Information on the STROBE Initiative is available at [www.strobe-statement.org](http://www.strobe-statement.org).





**Reduction in inequality in antenatal care use and persistence of inequality in skilled birth attendance in the Philippines from 1993 to 2008.**

|                                 |                                                                                                                                                                                                                                                                                                               |
|---------------------------------|---------------------------------------------------------------------------------------------------------------------------------------------------------------------------------------------------------------------------------------------------------------------------------------------------------------|
| Journal:                        | <i>BMJ Open</i>                                                                                                                                                                                                                                                                                               |
| Manuscript ID:                  | bmjopen-2012-002507.R1                                                                                                                                                                                                                                                                                        |
| Article Type:                   | Research                                                                                                                                                                                                                                                                                                      |
| Date Submitted by the Author:   | 04-Apr-2013                                                                                                                                                                                                                                                                                                   |
| Complete List of Authors:       | Molina, Faith; Tokyo Medical and Dental University, International Health<br>Nakamura, Keiko; Tokyo Medical and Dental University, International Health<br>Kizuki, Masashi; Tokyo Medical and Dental University, Health Promotion<br>Seino, Kaoruko; Tokyo Medical and Dental University, International Health |
| <b>Primary Subject Heading</b>: | Public health                                                                                                                                                                                                                                                                                                 |
| Secondary Subject Heading:      | Reproductive medicine, Health services research, Health policy                                                                                                                                                                                                                                                |
| Keywords:                       | PUBLIC HEALTH, REPRODUCTIVE MEDICINE, SOCIAL MEDICINE, STATISTICS & RESEARCH METHODS                                                                                                                                                                                                                          |
|                                 |                                                                                                                                                                                                                                                                                                               |

SCHOLARONE™  
Manuscripts

1  
2  
3 1 **Title: Reduction in inequality in antenatal care use and persistence of inequality in skilled**  
4  
5  
6 2 **birth attendance in the Philippines from 1993 to 2008**

7  
8 3 Faith Molina<sup>1</sup>, Keiko Nakamura<sup>1</sup>, Masashi Kizuki<sup>2</sup>, Seino Kaoruko<sup>1</sup>  
9  
10 4

11  
12 5 **Short Title:** Reduction in inequality in maternal health care use, Philippines  
13  
14 6

15  
16  
17 7 <sup>1</sup>International Health Section, Division of Public Health, Graduate School of Tokyo Medical and  
18  
19  
20 8 Dental University, Tokyo, Japan

21  
22 9 <sup>1</sup>Health Promotion Section, Division of Public Health, Graduate School of Tokyo Medical and  
23  
24  
25 10 Dental University, Tokyo, Japan  
26  
27 11

28  
29 12 Corresponding author: Keiko Nakamura  
30  
31

32 13 Postal Address: International Health and Medicine, Graduate School of Tokyo Medical and  
33  
34 14 Dental University, 1-5-45 Yushima, Bunkyo-ku, Tokyo 113-8519, Japan  
35  
36 15

37 16 Email: [nakamura.ith@tmd.ac.jp](mailto:nakamura.ith@tmd.ac.jp)  
38  
39 17

40 18 Tel. +81 3 5803 4048; Fax. +81 3 5803 4032  
41  
42 19

43 20 **Key Words:** socioeconomic factors, prenatal care/statistical & numerical data; healthcare  
44  
45  
46 21 disparities/statistics & numerical data, delivery, obstetrics/ statistics & numerical data, pregnancy  
47  
48 22

49  
50 23 **Word Count:** 2, 768  
51  
52  
53  
54  
55  
56  
57  
58  
59  
60

## 1 ARTICLE SUMMARY

2 **Article Focus:** Assessing the changes in the inequalities associated with maternal health care  
3 use according to economic status in the Philippines.

### 4 **Key Messages:**

- 5 • The study showed reduction in the inequality of antenatal care use through time  
6 suggesting substantial coverage of women in the lowest quintile.  
7
- 8 • However, inequality was shown to persist in skilled birth attendance and delivery in  
9 medical facilities indicating minimal professional delivery care among disadvantaged  
10 women despite health system wide efforts and improvements in the socio demographic  
11 profile of the population.
- 12 • The results call for equity oriented research and policies to close the wide gap in skilled  
13 care at birth in the Philippines and to determine the success factors in the reduction of  
14 inequality in antenatal-care use.

### 15 **Strengths and Limitations:**

- 16 • This is the first study of long-term trends in inequalities in utilization of critical maternal  
17 health interventions using four comparable, nationally-representative Demographic  
18 Health Survey (DHS) datasets commonly used as data sources in the literature.
- 19 • Comparability of the different survey years was achieved by selecting only the women  
20 who had live births within one year.
- 21 • The DHS wealth index was used to represent changes in socioeconomic inequalities  
22 through time.  
23

1  
2  
3 1 **ABSTRACT**  
4

5 2 **Objective:** To assess changes in the inequalities associated with maternal health care use  
6  
7  
8 3 according to economic status in the Philippines.  
9  
10 4

11  
12 5 **Design:** An analysis of four, population-based datasets that were conducted between 1993 and  
13  
14 6 2008.  
15  
16  
17 7

18  
19  
20 8 **Setting:** Philippines.  
21  
22 9

23  
24  
25 10 **Participants:** Women aged 15-49 years who had a live birth within one year in 1993 (n=1707),  
26  
27 11 1998 (n=1513), 2003 (n=1325), and 2008 (n=1209).  
28  
29 12

30  
31  
32 13 **Outcomes:** At least 4 visit of antenatal care, skilled birth attendance and delivery in a medical  
33  
34 14 facility.  
35  
36 15

37  
38  
39 16 **Results:** The adjusted odds ratio (OR) for antenatal-care use when comparing the highest wealth  
40  
41 17 index quintile with the lowest quintile declined from 1993 to 2008: 3.43 (95% confidence  
42  
43 18 interval (CI) 2.22-5.28) to 2.87 (95%CI 1.31-6.29). On the other hand, the adjusted OR for the  
44  
45 19 other two outcome indicators by the wealth index widened from 1993 to 2008: 9.92 (95%CI  
46  
47 20 5.98-16.43) to 15.53 (95%CI 6.90-34.94) for skilled birth attendance; and 7.74 (95%CI 4.22-  
48  
49 21 14.21) to 16.00 (95%CI 7.99-32.02) for delivery in a medical facility. The concentration index  
50  
51 22 for maternal health utilization in 1993 and 2008 were 0.19 and 0.09 for antenatal care; 0.26 and  
52  
53 23 0.24 for skilled birth attendance; and 0.41 and 0.35 for delivery in a medical facility.  
54  
55  
56  
57  
58  
59  
60

1  
2  
3 1  
4  
5  
6 2 **Conclusion:** Over a 16-year period, gradients in antenatal care use decreased and high level of  
7  
8 3 inequalities in skilled birth attendance and delivery in a medical facility persisted. The results  
9  
10 4 showed a disproportionate use of institutional care at birth among disadvantaged Filipino women.  
11  
12  
13 5  
14  
15 6  
16  
17 7  
18  
19  
20 8  
21  
22 9  
23  
24 10  
25  
26 11  
27  
28  
29 12  
30  
31 13  
32  
33 14  
34  
35 15  
36  
37 16  
38  
39 17  
40  
41 18  
42  
43 19  
44  
45 20  
46  
47 21  
48  
49 22  
50  
51 23  
52  
53  
54  
55  
56  
57  
58  
59  
60

For peer review only

1  
2  
3 1  
4  
5  
6 2 **INTRODUCTION**  
7 3  
8  
9  
10 4 Globally, there is an increasing concern regarding inequities in maternal health, especially in  
11  
12 5 developing countries. [1] The slow pace of reduction in maternal mortality rates despite cost-  
13  
14 6 effective solutions has urged the international community to look beyond accomplishing national  
15  
16 7 targets and to begin addressing wide disparities in women's health. [2]  
17  
18 8  
19  
20  
21 9 The key to realizing equity in maternal health is the achievement of equity in key maternal health  
22  
23 10 coverage, such as antenatal care (ANC) and skilled birth attendance (SBA). A previous study  
24  
25 11 indicated the greatest inequity in SBA coverage followed by ANC of more than four visits. [3]  
26  
27 12 Wide inequalities in these interventions have hindered the reduction by 0.75 of maternal  
28  
29 13 mortality ratio from 1990 to 2015. [4 – 6]  
30  
31  
32  
33 14  
34  
35 15 The Philippines has made efforts to improve women's health as mandated in its constitution and  
36  
37 16 as a signatory to several women's international conventions including the Millennium  
38  
39 17 Development Goals (MDG). National laws passed include the Magna Carta of Women (RA  
40  
41 18 9710), Maternity Benefits in Favor of Women Workers in the Private Sector (RA 7322), and  
42  
43 19 Maternal Package for Normal Spontaneous Vaginal Delivery of the Philippine Health Insurance  
44  
45 20 Corporation (PhilHealth). Starting 1995, the Philippine government has also implemented a  
46  
47 21 number of maternal health programs, including two Women's Health and Safe Motherhood  
48  
49 22 Projects. [7] Health system reforms to reduce maternal and neonatal mortality were also  
50  
51 23 spearheaded through the Department of Health Administrative Order No. 2008-0029 resulting to  
52  
53 24 the Integrated Maternal, Neonatal and Child Health and Nutrition Strategy (MNCHN). Specific  
54  
55  
56  
57  
58  
59  
60

1 reproductive health indicators of MNCHN to be met in 2010 include (1) an increase in modern  
2 contraceptive prevalence rate to 60%, (2) an increase in the proportion of pregnant women  
3 having at least four ANC visits to 80%, and (3) an increase in SBA and facility-based births to  
4 80%.

5  
6 There is, however, uncertainty regarding whether and how these maternal health policies and  
7 programs have substantially reduced gaps in the use of key maternal interventions among women  
8 from varying socioeconomic backgrounds through time. The Philippines is currently off track  
9 and slow in achieving MDG-5. In 2010, the estimated maternal mortality ratio was 99 per  
10 100000 live births, compared to the goal of 52 per 100000 live births in 2015. [8] This slow  
11 achievement of national targets indicates wide economic and regional inequalities in maternal  
12 and child health services. [9] The objective of this study was to assess the changes in inequalities  
13 in ANC, SBA, and delivery in medical facility (MEDFAC) in the Philippines between 1993 and  
14 2008 according to women's residence, woman's education, partner's education, wealth index,  
15 woman's age and birth order.

## 1           2 3           1   **DATA AND METHODS** 4 5 6           2

### 7 8           3   **Data Source** 9 10          4

11  
12          5   This study was performed using the data from the Philippine Demographic and Health Survey  
13          6   (PDHS) conducted for the periods of 1993, 1998, 2003, and 2008. All were nationally  
14          7   representative household surveys overseen by the National Statistics Office and National  
15          8   Steering Committee with financial and technical support from the United States Agency for  
16          9   International Development. [10] PDHS gathers detailed information on population, health, and  
17          10   nutrition to assist in the country's monitoring and impact evaluation. It ensures comparability  
18          11   across countries and time by developing standard model questionnaires, extensive survey  
19          12   procedures, interviewer training, and data processing guidelines. [11, 12]  
20  
21  
22  
23  
24  
25  
26  
27  
28  
29  
30  
31  
32  
33

34          14   The 1993 and 1998 PDHS employed a two-stage sample design, representing 14 regions and 16  
35          15   regions, respectively. A sample of 13700 households (response rate: 99.2%) was randomly  
36          16   selected from 750 primary sampling units (PSUs) for 1993 and a sample of 13708 households  
37          17   (response rate: 98.7%) was randomly selected from 755 PSUs for 1998. The 2003 and 2008  
38          18   PDHS followed a stratified three-stage cluster sample design representing 17 regions. A sample  
39          19   of 13914 households (response rate: 99.1%) was randomly selected from 819 PSUs for 2003 and  
40          20   a sample of 13764 households (response rate: 99.3%) was randomly selected from 794 PSUs for  
41          21   2008. Detailed descriptions of the study design and methods of data collection are accessible  
42          22   online in household survey reports. [13 – 16]  
43  
44  
45  
46  
47  
48  
49  
50  
51  
52  
53  
54  
55  
56  
57  
58  
59  
60



## 1       2 3       1   **Subjects** 4 5 6       2

7  
8       3   The numbers of women interviewed were as follows: 1993,  $n = 15029$ ; 1998,  $n = 13983$ ; 2003,  $n$   
9       4   = 13633; and 2008,  $n = 13594$ . The average response rate was 98%. The subjects we included in  
10       5   the analysis were women aged 15-49 years who had a live birth within one year, resulting in final  
11       6   sample sizes of 1707 in 1993, 1513 in 1998, 1325 in 2003, and 1209 in 2008.  
12  
13  
14  
15  
16  
17  
18  
19

## 20       8   **Study Variables** 21 22       9

23  
24       10   Three dependent variables were measured in the present study: (1) at least four antenatal  
25       11   consultations; (2) assistance by professional health personnel during delivery—either a doctor,  
26       12   nurse, or midwife, excluding traditional birth attendants (*hilot*), relatives, or friends; and (3)  
27       13   whether the birth occurred at home or in a medical facility (public or private).  
28  
29  
30  
31  
32  
33  
34  
35

36       15   The Demographic and Health Survey (DHS) wealth index is defined as a composite measure of a  
37       16   household's relative economic status by using the data in the DHSs. It is calculated by using data  
38       17   on a household's ownership of selected assets such as television or car, persons per sleeping  
39       18   room, ownership of agricultural land, domestic servant and other country specific items. [17] The  
40       19   asset quintile was derived from this DHS wealth index score of women who had a live birth  
41       20   within one year categorized into lowest, second, middle, fourth and highest, in respective survey  
42       21   years.  
43  
44  
45  
46  
47  
48  
49  
50  
51  
52

53       22  
54  
55  
56  
57  
58  
59  
60

1  
2  
3 1 Other independent variables were type of residence (urban or rural), woman's age (< 20, 20 – 29,  
4  
5 2 30 – 39, ≥ 40), birth order (1, 2, 3, ≥ 4), and educational level of woman and her partner (none,  
6  
7 3 primary, secondary, higher).  
8  
9  
10  
11  
12

### 13 **Ethical Review**

14  
15  
16

17 7 As protocols for all demographic health household surveys, the four PDHS were submitted for  
18 8 ethical reviews to the ICF Institutional Review Board (Calverton, MD) and an institutional  
19 9 review board or ethics review panel in the Philippines for approving research studies on human  
20 10 subjects. [18]  
21  
22  
23  
24  
25  
26  
27  
28

### 29 **Statistical Analysis**

30  
31  
32  
33

34 14 Changes in the socio demographic profile and use of ANC, SBA, and MEDFAC of the  
35 15 population were analyzed from household survey data in 1993, 1998, 2003, and 2008. Tests for  
36 16 trends were performed using the Mantel–Haenszel linear-by-linear association chi squared test.  
37 17 Crude and adjusted odds ratios between each dependent variable and all of the independent  
38 18 variables were assessed by multivariate logistic regression analysis. Complex household survey  
39 19 design was taken into account in all analyses using a sampling weight. All the missing data were  
40 20 excluded in the analysis. All analyses were performed using StataMP 11 Statistical Software  
41 21 (Stata Corp., College Station, TX).  
42  
43  
44  
45  
46  
47  
48  
49  
50  
51  
52  
53  
54  
55  
56  
57  
58  
59  
60

1  
2  
3 1 Inequalities of each outcome variable according to the wealth index were estimated using the  
4  
5  
6 2 concentration index. It is defined as twice the area between the concentration curve and the line  
7  
8 3 of equality (the 45-degree line) and was used to determine the magnitude of inequality. A  
9  
10 4 concentration index of 0 indicates perfect equality. A measure of 1 (or -1) indicates perfect  
11  
12  
13 5 inequality. [19, 20]  
14  
15  
16  
17  
18  
19  
20 8  
21  
22 9  
23  
24  
25  
26  
27  
28  
29  
30  
31  
32  
33  
34  
35  
36  
37  
38  
39  
40  
41  
42  
43  
44  
45  
46  
47  
48  
49  
50  
51  
52  
53  
54  
55  
56  
57  
58  
59  
60

For peer review only

## 1 RESULTS

2  
3  
4  
5  
6  
7  
8 There were changes in socio demographic profile of the population from 1993 to 2008. (Table 1)  
9  
10 The percentage of women with secondary and higher education increased during this period from  
11  
12 58.7% in 1993 to 74.6% in 2008. A corresponding increase was also observed in the percentage  
13  
14 of partners who finished secondary and higher education from 57.4% in 1993 to 70.7% in 2008.  
15  
16  
17 The percentage of women who have four or more children declined from 39.9% in 1993 to  
18  
19  
20 31.7% in 2008.  
21  
22  
23  
24  
25  
26  
27  
28  
29  
30  
31  
32  
33  
34  
35  
36  
37  
38  
39  
40  
41  
42  
43  
44  
45  
46  
47  
48  
49  
50  
51  
52  
53  
54  
55  
56  
57  
58  
59  
60

**Table 1** Socio demographic characteristics and childbirth history of women aged 15-49 years, per survey year, Philippines, 1993-2008

| Indicator                  | 1993<br>n=1707<br>% | 1998<br>n=1513<br>% | 2003<br>n=1325<br>% | 2008<br>n=1209<br>% |
|----------------------------|---------------------|---------------------|---------------------|---------------------|
| <b>Residence</b>           |                     |                     |                     |                     |
| Urban                      | 48.8                | 46.3                | 50.0                | 46.9                |
| Rural                      | 51.2                | 53.7                | 50.0                | 53.1                |
| <b>Woman's Education</b>   |                     |                     |                     |                     |
| None                       | 2.3                 | 1.8                 | 1.9                 | 1.2                 |
| Primary                    | 39.0                | 29.9                | 27.8                | 24.2                |
| Secondary                  | 37.4                | 39.7                | 42.5                | 50.3                |
| Higher                     | 21.3                | 28.6                | 27.8                | 24.3                |
| <b>Partner's Education</b> |                     |                     |                     |                     |
| None                       | 1.9                 | 1.6                 | 2.0                 | 1.9                 |
| Primary                    | 40.8                | 33.4                | 31.8                | 27.5                |
| Secondary                  | 37.3                | 36.7                | 40.1                | 45.0                |
| Higher                     | 20.1                | 28.3                | 26.1                | 25.7                |
| <b>Wealth Index</b>        |                     |                     |                     |                     |
| Lowest                     | 20.2                | 20.0                | 20.0                | 20.0                |
| Second                     | 19.8                | 20.0                | 20.1                | 20.0                |
| Middle                     | 20.0                | 20.0                | 20.0                | 20.1                |
| Fourth                     | 20.0                | 20.1                | 19.9                | 20.1                |
| Highest                    | 20.0                | 19.9                | 20.0                | 19.8                |
| <b>Woman's Age</b>         |                     |                     |                     |                     |
| <20                        | 5.6                 | 6.1                 | 7.2                 | 8.2                 |
| 20-29                      | 53.7                | 53.7                | 53.3                | 53.5                |
| 30-39                      | 35.6                | 35.1                | 34.4                | 32.5                |
| ≥40                        | 5.2                 | 5.1                 | 5.1                 | 5.8                 |
| <b>Birth Order</b>         |                     |                     |                     |                     |
| 1                          | 22.6                | 24.5                | 27.7                | 28.5                |
| 2                          | 20.7                | 21.1                | 23.6                | 24.6                |
| 3                          | 16.8                | 19.6                | 15.5                | 15.2                |
| ≥4                         | 39.9                | 34.8                | 33.2                | 31.7                |

1  
2  
3 1 Figure 1 shows that the utilization of ANC and MEDFAC increased from 53.4% in 1993 to  
4  
5 2 74.8% in 2008 and from 30.7% in 1993 to 46.3% in 2008, respectively. However, there is a  
6  
7 3 limited change in utilization of SBA from 55.5% in 1993 to 63.3% in 2008.  
8  
9  
10  
11  
12  
13  
14  
15  
16  
17  
18  
19  
20  
21  
22  
23  
24  
25  
26  
27  
28  
29  
30  
31  
32  
33  
34  
35  
36  
37  
38  
39  
40  
41  
42  
43  
44  
45  
46  
47  
48  
49  
50  
51  
52  
53  
54  
55  
56  
57  
58  
59  
60

For peer review only

1  
2  
3 **Figure 1** Total percentage of antenatal care use, skilled birth attendance and delivery in a  
4  
5  
6 medical facility, 1993-2008

7  
8 —●— Antenatal care, ···■··· Skilled birth attendance, -▲- Delivery at medical facility  
9  
10  
11  
12  
13  
14  
15  
16  
17  
18  
19  
20  
21  
22  
23  
24  
25  
26  
27  
28  
29  
30  
31  
32  
33  
34  
35  
36  
37  
38  
39  
40  
41  
42  
43  
44  
45  
46  
47  
48  
49  
50  
51  
52  
53  
54  
55  
56  
57  
58  
59  
60

For peer review only

1  
2  
3 1 As shown in Table 2, from 1993 to 2008, the rates of utilization of ANC, SBA and MEDFAC  
4  
5 2 were higher for women who were educated, better off, resided in an urban area, and those with  
6  
7 3 educated partners than among their poorer and less educated counterparts. There was a decline in  
8  
9 4 the odds ratio of women in highest wealth quintile compared to the lowest in ANC from 1993 to  
10  
11 5 2008. The adjusted odds ratio (OR) for antenatal-care use when comparing the highest wealth  
12  
13 6 index quintile with the lowest quintile declined from 1993 to 2008: 3.43 (95% confidence  
14  
15 7 interval (CI) 2.22-5.28) to 2.87 (95%CI 1.31-6.29). On the other hand, the adjusted OR for the  
16  
17 8 other two outcome indicators by the wealth index widened from 1993 to 2008: 9.92 (95%CI  
18  
19 9 5.98-16.43) to 15.53 (95%CI 6.90-34.94) for skilled birth attendance; and 7.74 (95%CI 4.22-  
20  
21 10 14.21) to 16.00 (95%CI 7.99-32.02) for delivery in a medical facility.  
22  
23  
24  
25  
26  
27  
28  
29  
30  
31  
32  
33  
34  
35  
36  
37  
38  
39  
40  
41  
42  
43  
44  
45  
46  
47  
48  
49  
50  
51  
52  
53  
54  
55  
56  
57  
58  
59  
60



1 **Table 2** Adjusted odd ratios of the association between wealth index and socio demographic characteristics and antenatal care, skilled birth attendance or delivery in medical facility of women age 15-49 years,  
 2 Philippines, 1993(n=1707), 1998(n=1513), 2003(n=1325), 2008(n=1209)

| Indicator                  | Antenatal Care |            |         |            | Skilled Birth Attendance |            |         |            | Delivery at medical facility |            |        |            |         |            |        |            |         |            |            |            |         |            |            |            |
|----------------------------|----------------|------------|---------|------------|--------------------------|------------|---------|------------|------------------------------|------------|--------|------------|---------|------------|--------|------------|---------|------------|------------|------------|---------|------------|------------|------------|
|                            | 1993           |            | 1998    |            | 2003                     |            | 2008    |            | 1993                         |            | 1998   |            | 2003    |            | 2008   |            |         |            |            |            |         |            |            |            |
|                            | OR             | 95% CI     | OR      | 95% CI     | OR                       | 95% CI     | OR      | 95% CI     | OR                           | 95% CI     | OR     | 95% CI     | OR      | 95% CI     | OR     | 95% CI     |         |            |            |            |         |            |            |            |
| <b>Residence</b>           |                |            |         |            |                          |            |         |            |                              |            |        |            |         |            |        |            |         |            |            |            |         |            |            |            |
| Urban                      | 1.29*          | 1.02, 1.62 | 1.44**  | 1.08, 1.93 | 1.70***                  | 1.26, 2.28 | 0.99    | 0.71, 1.38 | 2.59**                       | 2.03, 3.31 | 3.08** | 2.27, 4.18 | 3.21*** | 2.37, 4.34 | 2.11** | 1.52, 2.93 | 3.12*** | 2.35, 4.12 | 2.43**     | 1.77, 3.35 | 1.90*** | 1.41, 2.56 | 1.47*      | 1.07, 2.02 |
| Rural (Reference)          | 1.00           |            | 1.00    |            | 1.00                     |            | 1.00    |            | 1.00                         |            | 1.00   |            | 1.00    |            | 1.00   |            | 1.00    |            | 1.00       |            | 1.00    |            | 1.00       |            |
| <b>Woman's Education</b>   |                |            |         |            |                          |            |         |            |                              |            |        |            |         |            |        |            |         |            |            |            |         |            |            |            |
| None                       | 0.58           | 0.27, 1.26 | 0.55    | 0.21, 1.45 | 0.25**                   | 0.09, 0.71 | 0.08*** | 0.02, 0.36 | 0.17*                        | 0.05, 0.65 | 0.70   | 0.21, 2.39 | 0.22**  | 0.08, 0.66 | 0.66   | 0.14, 3.21 | 0.17    | 0.02, 1.94 | 0.48       | 0.11, 2.00 | 0.09*   | 0.01, 1.01 | 0.82       | 0.09, 7.51 |
| Primary                    | 0.54**         | 0.37, 0.79 | 0.46*** | 0.29, 0.74 | 0.53**                   | 0.34, 0.85 | 0.38*** | 0.21, 0.68 | 0.43**                       | 0.27, 0.67 | 0.67   | 0.39, 1.12 | 0.48**  | 0.30, 0.78 | 0.69   | 0.40, 1.19 | 0.58**  | 0.38, 0.88 | 0.52*      | 0.31, 0.86 | 0.44*** | 0.28, 0.70 | 0.60       | 0.35, 1.03 |
| Secondary                  | 0.67*          | 0.47, 0.95 | 0.65*   | 0.44, 0.97 | 0.69                     | 0.46, 1.03 | 0.59**  | 0.36, 0.96 | 0.58*                        | 0.38, 0.88 | 0.86   | 0.56, 1.34 | 0.57    | 0.37, 0.89 | 0.89   | 0.56, 1.41 | 0.59**  | 0.41, 0.84 | 0.54**     | 0.37, 0.78 | 0.49*** | 0.34, 0.70 | 0.77       | 0.53, 1.13 |
| Higher (Reference)         | 1.00           |            | 1.00    |            | 1.00                     |            | 1.00    |            | 1.00                         |            | 1.00   |            | 1.00    |            | 1.00   |            | 1.00    |            | 1.00       |            | 1.00    |            | 1.00       |            |
| <b>Partner's Education</b> |                |            |         |            |                          |            |         |            |                              |            |        |            |         |            |        |            |         |            |            |            |         |            |            |            |
| None                       | 0.39*          | 0.16, 0.94 | 0.30*   | 0.10, 0.85 | 0.41                     | 0.16, 1.05 | 0.55    | 0.19, 1.58 | 0.09*                        | 0.01, 0.71 | 0.02** | 0.00, 0.20 | 0.22**  | 0.08, 0.61 | 0.06*  | 0.01, 0.61 | 0.28    | 0.03, 2.54 | ¶(omitted) |            | 0.11    | 0.01, 1.11 | ¶(omitted) |            |
| Primary                    | 0.53***        | 0.36, 0.78 | 0.67    | 0.43, 1.03 | 0.54**                   | 0.34, 0.86 | 0.65    | 0.37, 1.13 | 0.65                         | 0.42, 1.02 | 0.47*  | 0.29, 0.78 | 0.53**  | 0.33, 0.86 | 0.41** | 0.23, 0.71 | 0.36*** | 0.23, 0.55 | 0.30*      | 0.19, 0.42 | 0.55*   | 0.34, 0.87 | 0.50*      | 0.30, 0.83 |
| Secondary                  | 0.74           | 0.52, 1.05 | 0.75    | 0.52, 1.09 | 0.68                     | 0.45, 1.02 | 0.75    | 0.45, 1.24 | 0.74                         | 0.50, 1.11 | 0.78   | 0.51, 1.19 | 0.66    | 0.43, 1.04 | 0.66   | 0.40, 1.07 | 0.58**  | 0.41, 0.83 | 0.46**     | 0.32, 0.65 | 0.72    | 0.50, 1.04 | 0.85       | 0.57, 1.27 |
| Higher (Reference)         | 1.00           |            | 1.00    |            | 1.00                     |            | 1.00    |            | 1.00                         |            | 1.00   |            | 1.00    |            | 1.00   |            | 1.00    |            | 1.00       |            | 1.00    |            | 1.00       |            |
| <b>Woman's Age</b>         |                |            |         |            |                          |            |         |            |                              |            |        |            |         |            |        |            |         |            |            |            |         |            |            |            |
| <20                        | 0.91           | 1.02, 1.62 | 0.45**  | 0.27, 0.74 | 1.12                     | 0.66, 1.90 | 0.91    | 0.52, 1.58 | 0.93                         | 0.54, 1.61 | 0.70   | 0.39, 1.26 | 0.89    | 0.52, 1.53 | 0.92   | 0.51, 1.66 | 0.88    | 0.46, 1.71 | 0.73       | 0.34, 1.57 | 0.70    | 0.41, 1.20 | 0.74       | 0.42, 1.31 |
| 20-29 (Reference)          | 1.00           |            | 1.00    |            | 1.00                     |            | 1.00    |            | 1.00                         |            | 1.00   |            | 1.00    |            | 1.00   |            | 1.00    |            | 1.00       |            | 1.00    |            | 1.00       |            |
| 30-39                      | 1.29           | 0.98, 1.69 | 1.86*** | 1.34, 2.58 | 1.20                     | 0.86, 1.66 | 1.42    | 0.98, 2.04 | 1.17                         | 0.86, 1.60 | 1.59*  | 1.10, 2.29 | 1.31    | 0.92, 1.89 | 1.54*  | 1.03, 2.30 | 1.36    | 0.98, 1.91 | 1.26       | 0.85, 1.85 | 1.46**  | 1.03, 2.07 | 1.59*      | 1.05, 2.40 |
| ≥40                        | 1.41           | 0.84, 2.39 | 1.66    | 0.94, 2.91 | 0.87                     | 0.46, 1.62 | 0.92    | 0.49, 1.70 | 1.96*                        | 1.07, 3.57 | 1.56   | 0.81, 2.99 | 0.87    | 0.42, 1.83 | 3.12*  | 1.48, 6.58 | 1.96    | 0.97, 3.97 | 2.02       | 0.98, 4.15 | 1.04    | 0.47, 2.32 | 3.44**     | 1.69, 6.98 |
| <b>Birth Order</b>         |                |            |         |            |                          |            |         |            |                              |            |        |            |         |            |        |            |         |            |            |            |         |            |            |            |
| 1 (Reference)              | 1.00           |            | 1.00    |            | 1.00                     |            | 1.00    |            | 1.00                         |            | 1.00   |            | 1.00    |            | 1.00   |            | 1.00    |            | 1.00       |            | 1.00    |            | 1.00       |            |
| 2                          | 0.76           | 0.55, 1.06 | 0.88    | 0.60, 1.30 | 0.84                     | 0.57, 1.25 | 0.79    | 0.50, 1.27 | 0.76                         | 0.53, 1.11 | 0.61*  | 0.40, 0.93 | 0.76    | 0.49, 1.17 | 0.87   | 0.57, 1.33 | 0.53*** | 0.35, 0.78 | 0.52*      | 0.33, 0.80 | 0.50*** | 0.34, 0.74 | 0.56*      | 0.37, 0.84 |
| 3                          | 0.64*          | 0.45, 0.93 | 0.64*   | 0.42, 0.97 | 0.92                     | 0.59, 1.45 | 0.55**  | 0.33, 0.92 | 0.50**                       | 0.33, 0.76 | 0.75   | 0.47, 1.18 | 0.69    | 0.42, 1.13 | 0.61   | 0.36, 1.02 | 0.36*** | 0.23, 0.55 | 0.72       | 0.44, 1.16 | 0.45*** | 0.29, 0.70 | 0.37**     | 0.23, 0.61 |

|                               |             |               |             |               |            |               |            |               |             |                |              |                |             |                |              |                |             |                |             |                |             |                |              |                |
|-------------------------------|-------------|---------------|-------------|---------------|------------|---------------|------------|---------------|-------------|----------------|--------------|----------------|-------------|----------------|--------------|----------------|-------------|----------------|-------------|----------------|-------------|----------------|--------------|----------------|
| <b>≥4</b>                     | 0.41<br>*** | 0.30,<br>0.58 | 0.36<br>*** | 0.24,<br>0.54 | 0.56<br>** | 0.36,<br>0.87 | 0.53<br>** | 0.32,<br>0.88 | 0.47*<br>** | 0.32,<br>0.69  | 0.31*<br>**  | 0.20,<br>0.49  | 0.51<br>**  | 0.31,<br>0.82  | 0.47*<br>*   | 0.28,<br>0.80  | 0.32<br>*** | 0.21,<br>0.49  | 0.41*<br>** | 0.25,<br>0.67  | 0.28<br>*** | 0.18,<br>0.45  | 0.23*<br>**  | 0.13,<br>0.38  |
| <b>Wealth Index</b>           |             |               |             |               |            |               |            |               |             |                |              |                |             |                |              |                |             |                |             |                |             |                |              |                |
| <b>Lowest<br/>(Reference)</b> | 1.00        |               | 1.00        |               | 1.00       |               | 1.00       |               | 1.00        |                | 1.00         |                | 1.00        |                | 1.00         |                | 1.00        |                | 1.00        |                | 1.00        |                | 1.00         |                |
| <b>Second</b>                 | 1.09        | 0.79,<br>1.50 | 1.21        | 0.86,<br>1.70 | 0.85       | 0.59,<br>1.24 | 1.48       | 0.99,<br>2.20 | 2.00*<br>** | 1.38,<br>2.89  | 1.99*<br>**  | 1.34,<br>2.96  | 2.06<br>*** | 1.36,<br>3.13  | 1.74*<br>*   | 1.14,<br>2.64  | 2.11<br>**  | 1.16,<br>3.83  | 1.88*<br>*  | 1.07,<br>3.29  | 2.15<br>**  | 1.25,<br>3.71  | 1.79*<br>*   | 1.05,<br>3.05  |
| <b>Middle</b>                 | 1.26        | 0.89,<br>1.78 | 1.85<br>**  | 1.26,<br>2.72 | 0.77       | 0.51,<br>1.16 | 1.25       | 0.80,<br>1.96 | 3.30*<br>** | 2.26,<br>4.83  | 4.05*<br>**  | 2.63,<br>6.24  | 2.95<br>*** | 1.88,<br>4.64  | 3.43*<br>**  | 2.18,<br>5.34  | 2.83<br>*** | 1.58,<br>5.07  | 2.31*<br>*  | 1.29,<br>4.14  | 3.01<br>*** | 1.73,<br>5.22  | 3.46*<br>**  | 2.02,<br>5.91  |
| <b>Fourth</b>                 | 1.68<br>**  | 1.16,<br>2.43 | 2.25<br>*** | 1.45,<br>3.52 | 1.12       | 0.70,<br>1.81 | 2.06<br>** | 1.19,<br>3.57 | 4.71*<br>** | 3.11,<br>7.13  | 7.17*<br>**  | 4.33,<br>11.86 | 4.87<br>*** | 2.90,<br>8.19  | 7.20*<br>**  | 4.22,1<br>2.30 | 4.50<br>*** | 2.50,<br>8.13  | 4.29*<br>** | 2.38,<br>7.74  | 4.07<br>*** | 2.32,<br>7.13  | 6.09*<br>**  | 3.41,<br>10.89 |
| <b>Highest</b>                | 3.43<br>*** | 2.22,<br>5.28 | 3.54<br>*** | 1.98,<br>6.33 | 2.44<br>** | 1.31,<br>4.54 | 2.87<br>** | 1.31,<br>6.29 | 9.92*<br>** | 5.98,<br>16.43 | 12.29<br>*** | 6.22,<br>24.27 | 6.98<br>*** | 3.62,<br>13.46 | 15.53<br>*** | 6.90,<br>34.94 | 7.74<br>*** | 4.22,<br>14.21 | 7.55*<br>** | 3.95,<br>14.44 | 6.98<br>*** | 3.76,<br>12.94 | 16.00<br>*** | 7.99,<br>32.02 |

\* p<0.05; \*\* p<0.01; \*\*\* p<0.001

Adjusted for residence, woman's education, partner's education, women' age and birth order.

¶All subject in this category did not deliver in medical facility and removed from analysis.

1 Figure 2 shows that there was a marked reduction in inequality of ANC from 1993 to 2008.  
2 Although gradients of its use among women with no education and women with higher  
3 education widened from 1993 to 2008, the gradients of ANC use among women with primary  
4 education and women with higher education as their highest educational attainment decreased  
5 from a difference of 40.4% in 1993 to 31.6% in 2008. A marked reduction was seen among  
6 women in the highest quintile compared to those in the lowest quintile, with a difference of  
7 48.2% in 1993 decreasing to 35.0% in 2008. A reduction in the concentration index from  
8 1993 to 2008 of ANC was observed.

1 **Figure 2** Trends in the percentage of antenatal care use by (a) woman's education, (b)  
2 partner's education, (c) wealth index, 1993-2008

3 Part a: -◆- None, -■- Primary, ···▲·· Secondary, -×- Higher

4 Part b: -◆- None, -■- Primary, ···▲·· Secondary, -×- Higher

5 Part c: -◆- Lowest -■- Second, -▲- Middle, ···×··· Fourth, -×- Highest

6 Note: Concentration Index 0.19, 95% CI 0.16 to 0.21 in 1993; Concentration Index 0.18, 95%  
7 CI 0.16 to 0.21 in 1998; Concentration Index 0.12, 95% CI 0.09 to 0.14 in 2003;  
8 Concentration Index 0.09, 95% CI 0.07 to 0.11 in 2008

1  
2  
3 1 Figure 3 shows the limited changes in the inequality of SBA from 1993 to 2008. A reduction  
4  
5 2 was observed in the gradient of SBA in comparison between women with no education and  
6  
7 3 those with higher education with a difference of 76.6% in 1993 decreasing to 70.7% in 2008.  
8  
9  
10 4 Reverse direction of the difference was observed between women in the highest quintile  
11  
12 5 compared to those in the lowest quintile from a difference of 69.1% in 1993 increasing to  
13  
14 6 71.1% in 2008. A reduction in the concentration index from 1993 to 2008 of SBA was  
15  
16 7 observed, however the concentration index obtained was larger than that of ANC.  
17  
18  
19  
20  
21  
22  
23  
24  
25  
26  
27  
28  
29  
30  
31  
32  
33  
34  
35  
36  
37  
38  
39  
40  
41  
42  
43  
44  
45  
46  
47  
48  
49  
50  
51  
52  
53  
54  
55  
56  
57  
58  
59  
60

1 **Figure 3** Trends in the percentage of skilled birth attendance by (a) woman's education, (b)  
2 partner's education, (c) wealth index, 1993-2008

3 Part a: -◆- None, -■- Primary, ···▲·· Secondary, -×- Higher

4 Part b: -◆- None, -■- Primary, ···▲·· Secondary, -×- Higher

5 Part c: -◆- Lowest -■- Second, -▲- Middle, ···×··· Fourth, -×- Highest

6 Note: Concentration Index 0.26, 95% CI 0.24 to 0.29 in 1993; Concentration Index 0.29, 95%  
7 CI 0.26 to 0.31 in 1998; Concentration Index 0.22, 95% CI 0.20 to 0.24 in 2003;  
8 Concentration Index 0.24, 95% CI 0.21 to 0.27 in 2008

1  
2  
3 1 Figure 4 shows the changes in inequality of MEDFAC from 1993 to 2008. As shown in the  
4  
5 2 figure, the gradient of MEDFAC between women with no education and those with higher  
6  
7 3 education widened from a difference of 60.4% in 1993 to 67.0% in 2008. The same  
8  
9 4 increasing direction for difference in use between women in the highest quintile compared to  
10  
11 5 those in the poorest quintile, with a difference of 59.5% in 1993 decreasing to 75.6% in 2008.  
12  
13  
14 6 A reduction in the concentration index from 1993 to 2008 of MEDFAC was observed,  
15  
16 7 however the concentration index obtained was also large in comparison to ANC.  
17  
18  
19  
20  
21  
22  
23  
24  
25  
26  
27  
28  
29  
30  
31  
32  
33  
34  
35  
36  
37  
38  
39  
40  
41  
42  
43  
44  
45  
46  
47  
48  
49  
50  
51  
52  
53  
54  
55  
56  
57  
58  
59  
60

1 **Figure 4** Trends in the percentage of delivery at medical facility by (a) woman's education,  
2 (b) partner's education, (c) wealth index, 1993-2008

3 Part a: -◆- None, -■- Primary, ···▲·· Secondary, -×- Higher

4 Part b: -◆- None, -■- Primary, ···▲·· Secondary, -×- Higher

5 Part c: -◆- Lowest -■- Second, -▲- Middle, ···×··· Fourth, -×- Highest

6 Note: Concentration Index 0.41, 95% CI 0.38 to 0.45 in 1993; Concentration Index 0.41, 95%  
7 CI 0.38 to 0.44 in 1998; Concentration Index 0.34, 95% CI 0.31 to 0.37 in 2003;  
8 Concentration Index 0.35, 95% CI 0.32 to 0.38 in 2008



## 1 DISCUSSION

2 This is the first study to describe the time trends in the inequalities of maternal health care  
3 utilization in the Philippines. The analysis of four nationally representative PDHS survey data  
4 sets ranging over a period of 16 years from 1993 to 2008 and showed a substantial increase in  
5 antenatal coverage and limited improvement in professional delivery care. Furthermore, our  
6 findings demonstrated reduction in the inequality of ANC use through time suggesting  
7 coverage of women in the lowest quintile or possibly decreased coverage for the wealthier  
8 quintile. The study also provided evidence of persistence of inequality in SBA and MEDFAC  
9 indicating minimal professional delivery care among women under lowest socioeconomic  
10 conditions.

11  
12 Our findings are in the line with evidence on 25 low income countries referred inequalities on  
13 institutional delivery rates as well as a weak health system and lack of skilled birth workers  
14 as the main barriers of use. [21] Marked underutilization of SBA has been noted among poor  
15 women in many studies. [22-23] However, one study conducted in India reported low  
16 utilization of both ANC and SBA among poor women through time despite of governmental  
17 interventions. [24]

18  
19 The increase of proportion of antenatal coverage from 1993 to 2008 was greater than that of  
20 proportion of births attended by skilled health personnel or that of delivery at a medical  
21 facility. Over the last several decades, the Philippine government has launched maternal  
22 health projects and programs to improve women's health. These were implemented alongside  
23 extensive health system reforms across the country on health financing, health regulation,  
24 health service delivery, and good governance in health following decentralization of health  
25 care services. [25] A study indicated that implementation areas that have intensively adopted

1  
2  
3 1 the health system-wide reforms have improved overall maternal health outcomes compared to  
4  
5 2 those that have not adopted. However, the poorly developed health information systems and  
6  
7 3 lack of referral emergency care facilities in remote coastal and isolated mountain  
8  
9 4 communities were the challenges that remain to be addressed. [26]  
10  
11  
12 5

13  
14 6 The results of the present study indicated reductions in the inequality of ANC use. This  
15  
16 7 translates to substantial ANC use among women under lowest living standard quintile. This  
17  
18 8 can be explained by improvements in both the health care system and in the socio  
19  
20 9 demographic profile of the population. The PhilHealth has been reported to increase uptake  
21  
22 10 and standards of ANC. [27] Improvements in the quality of services in health care institutions  
23  
24 11 through accreditation and the covering of financial costs by insurance contributed to the  
25  
26 12 increased use of ANC by Filipino women regardless of socio demographic status. [27, 28]  
27  
28  
29

30 13 There was also an increase in the total number of midwives and rural (*barangay*) health units  
31  
32 14 through the years, which addressed the problems of distance and lack of availability of health  
33  
34 15 workers and ANC facilities. [29] Moreover, positive changes in socio demographic and  
35  
36 16 demographic profiles, such as increases in educational status of women and their partners,  
37  
38 17 better economic status of women, and decreased fertility, may also explain the observed  
39  
40 18 reductions in the inequality of ANC use. [30]  
41  
42  
43

44  
45 20 Inequalities in SBA and MEDFAC persist in the Philippines despite health system-wide  
46  
47 21 efforts and improvements in the socio demographic profile of the population. After 16 years,  
48  
49 22 the majority of Filipino women from lowest living standard quintile continue to deliver at  
50  
51 23 home without professional assistance. In the Philippines, financial, transportation, absence of  
52  
53 24 companion to health facility, and treatment of health professionals to disadvantaged women  
54  
55 25 are major barriers that must be addressed to increase the rate of hospital delivery. [31] The  
56  
57  
58  
59  
60

1 majority of unskilled home deliveries among Filipino women occur near hospitals, and  
2 financial burden associated with hospital delivery is the main concern regardless of  
3 socioeconomic status. In 2009, families from the lowest 30% income group, delivery at a  
4 hospital would consume a minimum of 6.6% – 24.3% of the family's total annual income.  
5 [32, 33] This indicates that catastrophic financial costs are responsible for the decision by  
6 poorer Filipino women to deliver at home, even if they are close to health facilities in  
7 addition to low educational status and rural residence. PhilHealth coverage is low with only  
8 42% of families with at least one family member is enrolled in 2004. [34] Furthermore, the  
9 out of pocket expenditure as percentage of private expenditure on health has increased from  
10 77.2% in 2000 to 83.6% in 2010. [35]

11  
12 There are number of strengths in this study. The study used four nationally representative  
13 samples obtained by the DHSs commonly used as data sources in literatures worldwide. A  
14 national sample of women aged 15-49 years were collected to obtain a sufficient sample size  
15 for each survey year. Selection of the women who had live births only within one year as the  
16 subjects of the individual surveys sharpened the comparison of the data of four different years.  
17 This reduced the magnitude of recall bias by the respondents. All four PDHSs followed strict  
18 data quality checks through pre testing, translation of questionnaires to local dialect,  
19 interviewer training, and duplicate data entry. It also employed standardized questionnaire  
20 format which are carefully developed to ascertain accurate response and information from the  
21 participants. The analysis used the DHS wealth index, a systematically developed composite  
22 index to measure economic status of the subjects among the DHS samples. The study used  
23 relevant measurements of inequity, the concentration index, which measures the long term  
24 trends in inequalities in utilization of critical maternal health care interventions in the  
25 Philippines which is important for future health policy.

1  
2  
3  
4  
5  
6  
7  
8  
9  
10  
11  
12  
13  
14  
15  
16  
17  
18  
19  
20  
21  
22  
23  
24  
25  
26  
27  
28  
29  
30  
31  
32  
33  
34  
35  
36  
37  
38  
39  
40  
41  
42  
43  
44  
45  
46  
47  
48  
49  
50  
51  
52  
53  
54  
55  
56  
57  
58  
59  
601  
2  
3  
4  
5  
6  
7  
8  
9  
10  
11  
12  
13  
14  
15  
16  
17  
18  
19  
20  
21  
22  
23  
24  
25  
26  
27  
28  
29  
30  
31  
32  
33  
34  
35  
36  
37  
38  
39  
40  
41  
42  
43  
44  
45  
46  
47  
48  
49  
50  
51  
52  
53  
54  
55  
56  
57  
58  
59  
60

There should be a caution in interpreting trends of maternal health care use by the DHS wealth index since it is an index to show a relative position measured by a composite economic status indicator among the subjects of the particular year and country. Therefore the scores of wealth index in different years are not comparable.

Our study implies the need to research solutions to reduce inequality in SBA and delivery at a medical facility, and to determine the factors responsible for the persistence of inequality in SBA and delivery at a medical facility despite government and non-governmental efforts.

Recognizing reproductive health as a basic right of women regardless of socio demographic status is important in formulating national policy and programs to address inequality in maternal health service utilization.

## 1 **ACKNOWLEDGEMENTS**

2  
3 We are thankful to MEASURE DHS for allowing us to analyze the 1993, 1998, 2003 and  
4 2008 PDHS datasets. We also acknowledge with deepest thankfulness the organizations and  
5 individuals in the Philippines who contributed to the 1993, 1998, 2003 and 2008 PDHS.  
6

## 7 **COMPETING INTERESTS**

8  
9 The authors declare that they have no competing interests.  
10

## 11 **FUNDING**

12  
13 This research received no specific grant from any funding agency in the public, commercial  
14 or not-for-profit sectors.  
15

## 16 **CONTRIBUTORSHIP**

17  
18 FM and KN conceptualized and designed the study. FM obtained and FM and MK analyzed  
19 the data. FM, KN, MK, and KS structured and edited the manuscript. All authors approved  
20 the final manuscript.  
21

## 22 **DATA SHARING**

23  
24 There are no additional unpublished data from the study.  
25  
26  
27  
28  
29  
30  
31  
32  
33  
34  
35  
36  
37  
38  
39  
40  
41  
42  
43  
44  
45  
46  
47  
48  
49  
50  
51  
52  
53  
54  
55  
56  
57  
58  
59  
60

1  
2  
3 **1 REFERENCES**

- 4  
5 2 1. Commission on information and accountability for Women's and Children's Health.  
6  
7 3 Keeping promises, measuring results. World Health Organization; 2011. Available  
8  
9 4 from:  
10  
11 5 [http://www.everywomaneverychild.org/images/content/files/accountability\\_commissi](http://www.everywomaneverychild.org/images/content/files/accountability_commissi)  
12  
13 [on/final\\_report/Final\\_EN\\_Web.pdf](http://www.everywomaneverychild.org/images/content/files/accountability_commissi) (accessed March 2012).  
14  
15 6  
16 7 2. Thomsen S, Hoa Dt, Målvqvist M, et al. Promoting equity to achieve maternal and  
17  
18 8 child health. *Reprod Health Matters* 2011;**19**(38):176-82.  
19  
20 9 3. Barros AJ, Ronsmans C, Axelson H, et al. Equity in maternal, newborn and child  
21  
22 10 health interventions in countdown to 2015: a retrospective review of survey data from  
23  
24 11 54 countries. *Lancet* 2012;**379**(9822):1225-33.  
25  
26 12 4. Zere E, Kirigia JM, Duale S, et al. Inequities in maternal and child health outcomes  
27  
28 13 and interventions in Ghana. *BMC Public Health* 2012;**12**:252.  
29  
30 14 5. Wirth M, Sacks E, Delamonica E, et al. "Delivering on the mdgs?":equity and  
31  
32 15 maternal health in Ghana, Ethiopia and Kenya. *East Afr J Public Health*  
33  
34 16 2008;**5**(3):133-41.  
35  
36 17 6. Silal SP, Penn Kenana L, Harris B, et al. Exploring inequalities in access to and use of  
37  
38 18 maternal health services in South Africa. *BMC Health Serv Res* 2012;**12**(1):120.  
39  
40 19 7. Asian Development Bank Operations Evaluation Department. Project performance  
41  
42 20 evaluation report in the Philippines. Asian Development Bank; 2007. Available from:  
43  
44 21 <http://www.adb.org/sites/default/files/27010-PHI-PPER.pdf> (accessed January 2013)  
45  
46 22 8. WHO, UNICEF, UNFPA, The World Bank. Trends in maternal mortality 1990-2010:  
47  
48 23 WHO, UNICEF, UNFPA and The World Bank estimates. Geneva: World Health  
49  
50 24 Organization; 2012. Available from:  
51  
52  
53  
54  
55  
56  
57  
58  
59  
60

- 1  
2  
3 1 <http://www.unfpa.org/webdav/site/global/shared/documents/publications/2012/Trends>  
4  
5 2 [in\\_maternal\\_mortality\\_A4-1.pdf](#) (accessed March 2012).  
6  
7 3 9. Lavado RF, Lagrada LP. Are Maternal and Child Care Programs Reaching the  
8  
9 4 Poorest Regions in the Philippines? Philippine Institute for Developmental Studies.  
10  
11 5 2008 Nov; Discussion Paper Series No. 2008-30.  
12  
13 6 10. Demographic and Health Surveys [Internet]. Calverton: Macro International.  
14  
15 7 Available from: <http://www.measuredhs.com/> (accessed July 2011).  
16  
17 8 11. Rutstein SO, Rojas G. Guide to DHS statistics. Calverton, MD: ORC Macro,2003.  
18  
19 9 12. Croft T. DHS Data Editing and Imputation. Calverton, MD: ORC Macro International.  
20  
21 10 13. National Statistics Office (NSO) [Philippines] and Macro International Inc. (MI).1994.  
22  
23 11 National Demographic Survey 1993. Calverton, Maryland: NSO and MI.  
24  
25 12 14. National Statistics Office (NSO)], Department of Health (DOH) [Philippines] and  
26  
27 13 Macro International Inc. (MI).1999. National Demographic Survey 1998. Manila:  
28  
29 14 NSO and MI.  
30  
31 15 15. National Statistics Office (NSO) [Philippines], and ORC Macro. 2004. National  
32  
33 16 Demographic Survey 2003. Calverton, Maryland: NSO and ORC Macro.  
34  
35 17 16. National Statistics Office (NSO) [Philippines], and ICF Macro. 2009. National  
36  
37 18 Demographic Survey 2008. Calverton, Maryland: National Statistics Office and ICF  
38  
39 19 Macro.  
40  
41 20 17. Rutstein, SO, Kiersten J. 2004. The DHS Wealth Index. DHS Comparative Reports  
42  
43 21 No. 6. Calverton, Maryland: ORC Macro  
44  
45 22 18. Filmer D, Pritchett LH. Estimating wealth effects without expenditure data or tears:  
46  
47 23 an application to educational enrollments in states of India. Demography 2001,  
48  
49 24 **38**(1):115-132.  
50  
51  
52  
53  
54  
55  
56  
57  
58  
59  
60

- 1  
2  
3 1 19. O'Donnell O, van Doorslaer E, Wagstaff A, et al. Analyzing health equity using  
4  
5 2 household survey data: a guide to techniques and their implementation. Washington,  
6  
7 3 D.C: The World Bank; 2008. Available from:  
8  
9 4 [http://siteresources.worldbank.org/INTPAH/Resources/Publications/459843-](http://siteresources.worldbank.org/INTPAH/Resources/Publications/459843-1195594469249/HealthEquityFINAL.pdf)  
10  
11 5 [1195594469249/HealthEquityFINAL.pdf](http://siteresources.worldbank.org/INTPAH/Resources/Publications/459843-1195594469249/HealthEquityFINAL.pdf) (accessed July 2011).  
12  
13  
14 6 20. Wagstaff A. The concentration index of a binary outcome revisited. *J Health Econ*  
15  
16 7 2011;**20**(10):1155-60.  
17  
18 8 21. Limwattananon S, Tangcharoensathien V, Sirilak S. Trends and inequities in where  
19  
20 9 women delivered their babies in 25 low-income countries: evidence from  
21  
22 10 Demographic and Health Surveys. *Reprod Health Matters* 2011;**19**(37):75-85.  
23  
24 11 22. Zere E, Oluwole D, Kirigia JM, et al. Inequalities in skilled attendance at birth in  
25  
26 12 Namibia: a decomposition analysis. *BMC Pregnancy Childbirth* 2011;**11**:34.  
27  
28 13 23. Collin SM, Anwar I, Ronsmans C. A decade of inequality in maternity  
29  
30 14 care: antenatal care, professional attendance at delivery, and caesarean section in  
31  
32 15 Bangladesh (1991–2004). *Int J Equity Health* 2007 Aug;**6**:9.  
33  
34 16 24. Pathak PK, Singh A, Subramanian SV. Economic Inequalities in maternal health care:  
35  
36 17 prenatal care and skilled birth attendance in India, 1992-2006. *PLoS One*  
37  
38 18 2010;**5**(10):e13593.  
39  
40 19 25. Lakshminarayanan, R. Decentralisation and its implications for reproductive health:  
41  
42 20 the Philippines experience. *Reprod Health Matters* 2003;**11**(21):96-107.  
43  
44 21 26. Huntington D, Banzon E, Recidoro ZD. A systems approach to improving maternal  
45  
46 22 health in the Philippines. *Bull World Health Organ* 2012;**90**(2):104-110.  
47  
48 23 27. Kozhimannil KB, Valera MR, Adams A, et al. The population-level impacts of a  
49  
50 24 national health insurance program and franchise midwife clinics on achievement of  
51  
52  
53  
54  
55  
56  
57  
58  
59  
60



- 1 prenatal and delivery care standards in the Philippines. *Health Policy* 2009;**92**(1):55-  
2 64.
- 3 28. Quimbo SA, Peabody JW, Shimkhada R, et al. Should we have confidence if a  
4 physician is accredited? A study of the relative impacts of accreditation and insurance  
5 payments on quality of care in the Philippines. *Soc Sci Med* 2008;**67**(4):505-10.
- 6 29. Department of Health. Vital, Health and Nutrition. Manila; National Statistical  
7 Coordination Board; 2012. Available from:  
8 [http://www.nscb.gov.ph/secstat/d\\_vital.asp](http://www.nscb.gov.ph/secstat/d_vital.asp) (accessed Mar 2012).
- 9 30. Simkhada B, Teijlingen ER, Porter M, et al. Factors affecting the utilization of  
10 antenatal in developing countries: a systematic review of the literature. *J Adv Nurs*  
11 2008;**61**(3):244-60.
- 12 31. Sobel HL, Oliveros YE, Nyunt US. Secondary analysis of a national health survey on  
13 factors influencing women in the Philippines to deliver at home and unattended by a  
14 healthcare professional. *Int J Gynaecol Obstet* 2010;**111**(2):157-60.
- 15 32. National Statistics Office. 2004 Annual Poverty Indicators Survey (APIS)  
16 (Preliminary Results). Manila:National Statistics Office; 23 Sept 2005. Available  
17 from: [http://www.census.gov.ph/content/2004-annual-poverty-indicators-survey-apis-](http://www.census.gov.ph/content/2004-annual-poverty-indicators-survey-apis-preliminary-results)  
18 [preliminary-results](http://www.census.gov.ph/content/2004-annual-poverty-indicators-survey-apis-preliminary-results) (accessed Jan 2013).
- 19 33. Ericta CN. Families in the bottom 30 percent income group earned 62 thousand pesos  
20 in 2009. Manila:National Statistics Office; 4 Feb 2011. Available from:  
21 <http://www.census.gov.ph/data/pressrelease/2011/ie09frtx.html> (accessed Mar 2012).
- 22 34. Tsolmongerel T. Costing study for selected hospitals in the Philippines. March 2009  
23 Available from:  
24 [http://www.doh.gov.ph/sites/default/files/Costing%20Study%20for%20Selected%20](http://www.doh.gov.ph/sites/default/files/Costing%20Study%20for%20Selected%20Hospitals%20in%20the%20Philippines.pdf)  
25 [Hospitals%20in%20the%20Philippines.pdf](http://www.doh.gov.ph/sites/default/files/Costing%20Study%20for%20Selected%20Hospitals%20in%20the%20Philippines.pdf) (accessed Mar 2012).

1  
2  
3  
4  
5  
6  
7  
8  
9  
10  
11  
12  
13  
14  
15  
16  
17  
18  
19  
20  
21  
22  
23  
24  
25  
26  
27  
28  
29  
30  
31  
32  
33  
34  
35  
36  
37  
38  
39  
40  
41  
42  
43  
44  
45  
46  
47  
48  
49  
50  
51  
52  
53  
54  
55  
56  
57  
58  
59  
60

1 35. Global Health expenditure Database. Philippines National Expenditure on Health  
2 (Philippine Peso) 1995-2010. World Health Organization; 2012. Available from:  
3 [http://apps.who.int/nha/database/StandardReport.aspx?ID=REP\\_WEB\\_MINI\\_TEMP](http://apps.who.int/nha/database/StandardReport.aspx?ID=REP_WEB_MINI_TEMP)  
4 [LATE\\_WEB\\_VERSION&COUNTRYKEY=84655](http://apps.who.int/nha/database/StandardReport.aspx?ID=REP_WEB_MINI_TEMP_LATE_WEB_VERSION&COUNTRYKEY=84655)  
5

For peer review only

1  
2  
3  
4  
5  
6  
7  
8  
9  
10  
11  
12  
13  
14  
15  
16  
17  
18  
19  
20  
21  
22  
23  
24  
25  
26  
27  
28  
29  
30  
31  
32  
33  
34  
35  
36  
37  
38  
39  
40  
41  
42  
43  
44  
45  
46  
47  
48  
49  
50  
51  
52  
53  
54  
55  
56  
57  
58  
59  
60

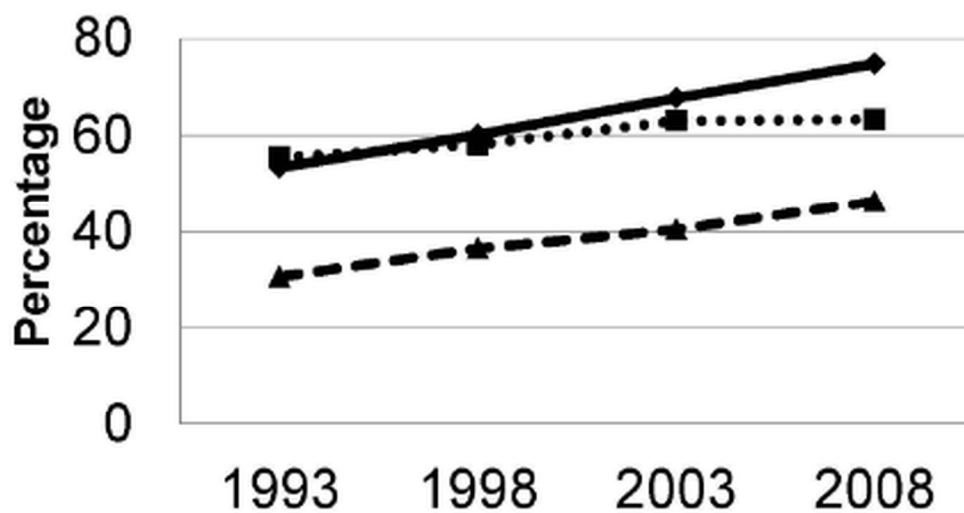

170x90mm (300 x 300 DPI)

For peer review only

1  
2  
3  
4  
5  
6  
7  
8  
9  
10  
11  
12  
13  
14  
15  
16  
17  
18  
19  
20  
21  
22  
23  
24  
25  
26  
27  
28  
29  
30  
31  
32  
33  
34  
35  
36  
37  
38  
39  
40  
41  
42  
43  
44  
45  
46  
47  
48  
49  
50  
51  
52  
53  
54  
55  
56  
57  
58  
59  
60

Part a. Woman's education

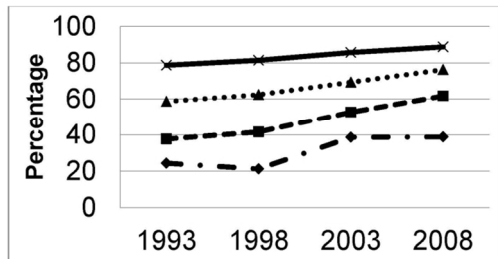

Part b. Partner's education

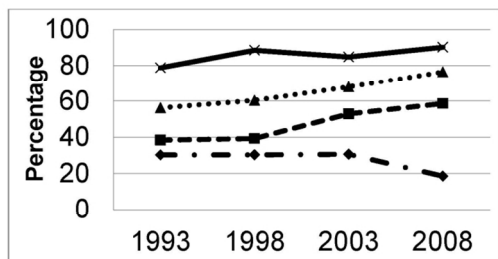

Part c. Wealth Index

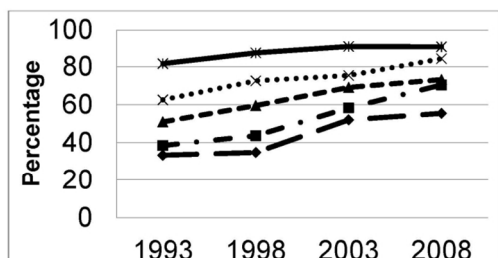

90x139mm (300 x 300 DPI)

1  
2  
3  
4  
5  
6  
7  
8  
9  
10  
11  
12  
13  
14  
15  
16  
17  
18  
19  
20  
21  
22  
23  
24  
25  
26  
27  
28  
29  
30  
31  
32  
33  
34  
35  
36  
37  
38  
39  
40  
41  
42  
43  
44  
45  
46  
47  
48  
49  
50  
51  
52  
53  
54  
55  
56  
57  
58  
59  
60

Part a. Woman's education

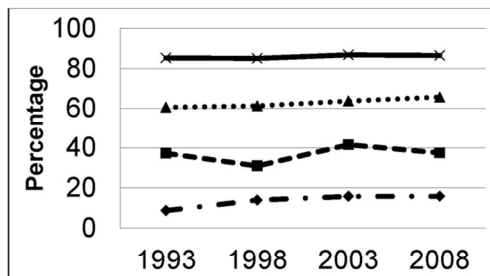

Part b. Partner's education

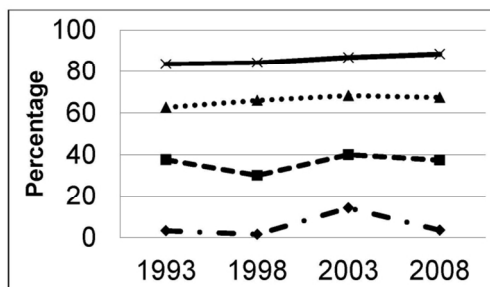

Part c. Wealth Index

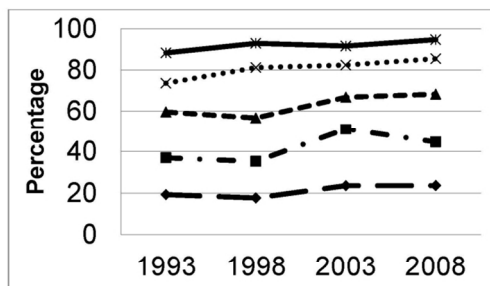

90x139mm (300 x 300 DPI)

1  
2  
3  
4  
5  
6  
7  
8  
9  
10  
11  
12  
13  
14  
15  
16  
17  
18  
19  
20  
21  
22  
23  
24  
25  
26  
27  
28  
29  
30  
31  
32  
33  
34  
35  
36  
37  
38  
39  
40  
41  
42  
43  
44  
45  
46  
47  
48  
49  
50  
51  
52  
53  
54  
55  
56  
57  
58  
59  
60

Part a. Woman's education

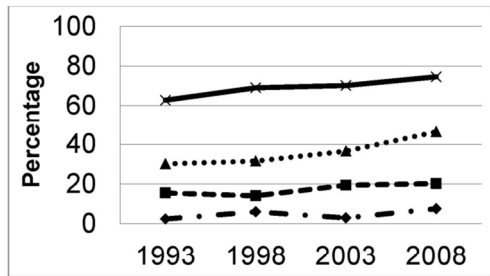

Part b. Partner's education

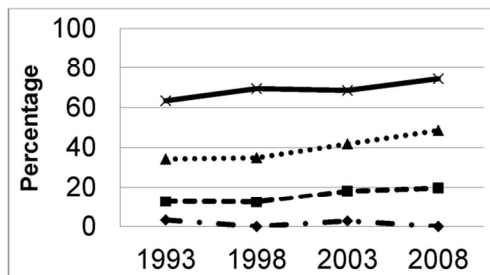

Part c. Wealth Index

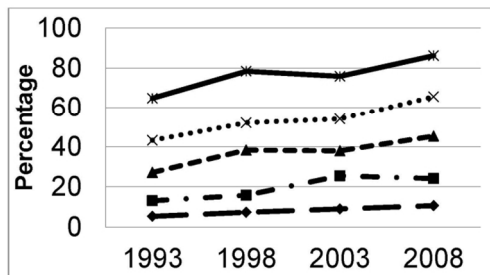

90x139mm (300 x 300 DPI)

**STROBE 2007 (v4) checklist of items to be included in reports of observational studies in epidemiology\***  
**Checklist for cohort, case-control, and cross-sectional studies (combined)**

| Section/Topic             | Item # | Recommendation                                                                                                                                                                                                                                                                                                                                                                                                                                                         | Reported on page # |
|---------------------------|--------|------------------------------------------------------------------------------------------------------------------------------------------------------------------------------------------------------------------------------------------------------------------------------------------------------------------------------------------------------------------------------------------------------------------------------------------------------------------------|--------------------|
| Title and abstract        | 1      | (a) Indicate the study's design with a commonly used term in the title or the abstract                                                                                                                                                                                                                                                                                                                                                                                 | 1                  |
|                           |        | (b) Provide in the abstract an informative and balanced summary of what was done and what was found                                                                                                                                                                                                                                                                                                                                                                    | 3                  |
| <b>Introduction</b>       |        |                                                                                                                                                                                                                                                                                                                                                                                                                                                                        |                    |
| Background/rationale      | 2      | Explain the scientific background and rationale for the investigation being reported                                                                                                                                                                                                                                                                                                                                                                                   | 5                  |
| Objectives                | 3      | State specific objectives, including any pre-specified hypotheses                                                                                                                                                                                                                                                                                                                                                                                                      | 6                  |
| <b>Methods</b>            |        |                                                                                                                                                                                                                                                                                                                                                                                                                                                                        |                    |
| Study design              | 4      | Present key elements of study design early in the paper                                                                                                                                                                                                                                                                                                                                                                                                                | 9                  |
| Setting                   | 5      | Describe the setting, locations, and relevant dates, including periods of recruitment, exposure, follow-up, and data collection                                                                                                                                                                                                                                                                                                                                        | 7                  |
| Participants              | 6      | (a) <i>Cohort study</i> —Give the eligibility criteria, and the sources and methods of selection of participants. Describe methods of follow-up<br><i>Case-control study</i> —Give the eligibility criteria, and the sources and methods of case ascertainment and control selection. Give the rationale for the choice of cases and controls<br><i>Cross-sectional study</i> —Give the eligibility criteria, and the sources and methods of selection of participants | 8                  |
|                           |        | (b) <i>Cohort study</i> —For matched studies, give matching criteria and number of exposed and unexposed<br><i>Case-control study</i> —For matched studies, give matching criteria and the number of controls per case                                                                                                                                                                                                                                                 |                    |
| Variables                 | 7      | Clearly define all outcomes, exposures, predictors, potential confounders, and effect modifiers. Give diagnostic criteria, if applicable                                                                                                                                                                                                                                                                                                                               | 8                  |
| Data sources/ measurement | 8*     | For each variable of interest, give sources of data and details of methods of assessment (measurement). Describe comparability of assessment methods if there is more than one group                                                                                                                                                                                                                                                                                   | 7                  |
| Bias                      | 9      | Describe any efforts to address potential sources of bias                                                                                                                                                                                                                                                                                                                                                                                                              | 9                  |
| Study size                | 10     | Explain how the study size was arrived at                                                                                                                                                                                                                                                                                                                                                                                                                              | 8                  |
| Quantitative variables    | 11     | Explain how quantitative variables were handled in the analyses. If applicable, describe which groupings were chosen and why                                                                                                                                                                                                                                                                                                                                           | 8                  |
| Statistical methods       | 12     | (a) Describe all statistical methods, including those used to control for confounding                                                                                                                                                                                                                                                                                                                                                                                  | 9                  |
|                           |        | (b) Describe any methods used to examine subgroups and interactions                                                                                                                                                                                                                                                                                                                                                                                                    | -                  |
|                           |        | (c) Explain how missing data were addressed                                                                                                                                                                                                                                                                                                                                                                                                                            | 9                  |
|                           |        | (d) <i>Cohort study</i> —If applicable, explain how loss to follow-up was addressed<br><i>Case-control study</i> —If applicable, explain how matching of cases and controls was addressed                                                                                                                                                                                                                                                                              | 9                  |

|                          |     |                                                                                                                                                                                                              |             |
|--------------------------|-----|--------------------------------------------------------------------------------------------------------------------------------------------------------------------------------------------------------------|-------------|
|                          |     | <i>Cross-sectional study</i> —If applicable, describe analytical methods taking account of sampling strategy                                                                                                 |             |
|                          |     | (e) Describe any sensitivity analyses                                                                                                                                                                        |             |
| <b>Results</b>           |     |                                                                                                                                                                                                              |             |
| Participants             | 13* | (a) Report numbers of individuals at each stage of study—eg numbers potentially eligible, examined for eligibility, confirmed eligible, included in the study, completing follow-up, and analysed            | 8           |
|                          |     | (b) Give reasons for non-participation at each stage                                                                                                                                                         | -           |
|                          |     | (c) Consider use of a flow diagram                                                                                                                                                                           | -           |
| Descriptive data         | 14* | (a) Give characteristics of study participants (eg demographic, clinical, social) and information on exposures and potential confounders                                                                     | 11,12       |
|                          |     | (b) Indicate number of participants with missing data for each variable of interest                                                                                                                          | -           |
|                          |     | (c) <i>Cohort study</i> —Summarise follow-up time (eg, average and total amount)                                                                                                                             |             |
| Outcome data             | 15* | <i>Cohort study</i> —Report numbers of outcome events or summary measures over time                                                                                                                          |             |
|                          |     | <i>Case-control study</i> —Report numbers in each exposure category, or summary measures of exposure                                                                                                         |             |
|                          |     | <i>Cross-sectional study</i> —Report numbers of outcome events or summary measures                                                                                                                           | 13,15,18-23 |
| Main results             | 16  | (a) Give unadjusted estimates and, if applicable, confounder-adjusted estimates and their precision (eg, 95% confidence interval). Make clear which confounders were adjusted for and why they were included | 16          |
|                          |     | (b) Report category boundaries when continuous variables were categorized                                                                                                                                    |             |
|                          |     | (c) If relevant, consider translating estimates of relative risk into absolute risk for a meaningful time period                                                                                             |             |
| Other analyses           | 17  | Report other analyses done—eg analyses of subgroups and interactions, and sensitivity analyses                                                                                                               | -           |
| <b>Discussion</b>        |     |                                                                                                                                                                                                              |             |
| Key results              | 18  | Summarise key results with reference to study objectives                                                                                                                                                     | 24          |
| Limitations              | 19  | Discuss limitations of the study, taking into account sources of potential bias or imprecision. Discuss both direction and magnitude of any potential bias                                                   | 27          |
| Interpretation           | 20  | Give a cautious overall interpretation of results considering objectives, limitations, multiplicity of analyses, results from similar studies, and other relevant evidence                                   | 24-26       |
| Generalisability         | 21  | Discuss the generalisability (external validity) of the study results                                                                                                                                        | 24          |
| <b>Other information</b> |     |                                                                                                                                                                                                              |             |
| Funding                  | 22  | Give the source of funding and the role of the funders for the present study and, if applicable, for the original study on which the present article is based                                                | 28          |

\*Give information separately for cases and controls in case-control studies and, if applicable, for exposed and unexposed groups in cohort and cross-sectional studies.

**Note:** An Explanation and Elaboration article discusses each checklist item and gives methodological background and published examples of transparent reporting. The STROBE checklist is best used in conjunction with this article (freely available on the Web sites of PLoS Medicine at <http://www.plosmedicine.org/>, Annals of Internal Medicine at <http://www.annals.org/>, and Epidemiology at <http://www.epidem.com/>). Information on the STROBE Initiative is available at [www.strobe-statement.org](http://www.strobe-statement.org).



1  
2  
3 1 **Title: Reduction in inequality in antenatal care use and persistence of inequality in skilled**  
4  
5  
6 2 **birth attendance in the Philippines from 1993 to 2008**

7  
8 3 Faith Molina<sup>1</sup>, Keiko Nakamura<sup>1</sup>, Masashi Kizuki<sup>2</sup>, Seino Kaoruko<sup>1</sup>  
9  
10 4

11  
12 5 **Short Title:** Reduction in inequality in maternal health care use, Philippines  
13  
14 6

15  
16  
17 7 <sup>1</sup>International Health Section, Division of Public Health, Graduate School of Tokyo Medical and  
18  
19 8 Dental University, Tokyo, Japan

20  
21  
22 9 <sup>1</sup>Health Promotion Section, Division of Public Health, Graduate School of Tokyo Medical and  
23  
24 10 Dental University, Tokyo, Japan  
25  
26

27 11  
28  
29 12 Corresponding author: Keiko Nakamura  
30

31  
32 13 Postal Address: International Health and Medicine, Graduate School of Tokyo Medical and  
33  
34 14 Dental University, 1-5-45 Yushima, Bunkyo-ku, Tokyo 113-8519, Japan  
35

36 15 Email: [nakamura.ith@tmd.ac.jp](mailto:nakamura.ith@tmd.ac.jp)  
37

38 16 Tel. +81 3 5803 4048; Fax. +81 3 5803 4032  
39  
40  
41 17

42  
43 18 **Key Words:** socioeconomic factors, prenatal care/statistical & numerical data; healthcare  
44  
45 19 disparities/statistics & numerical data, delivery, obstetrics/ statistics & numerical data, pregnancy  
46  
47  
48 20

49  
50 21 **Word Count:** 2, 825  
51  
52  
53 22  
54  
55 23  
56  
57  
58  
59  
60

## 1 ARTICLE SUMMARY

2 **Article Focus:** Assessing the changes in the inequalities associated with maternal health care  
3 use according to **economic status** in the Philippines.

### 4 **Key Messages:**

- 5 • The study showed reduction in the inequality of **antenatal care** use through time  
6 suggesting substantial coverage of women in the lowest quintile.
- 7 • However, inequality **was** shown to persist in **skilled birth attendance** and **delivery in**  
8 **medical facilities** indicating minimal professional delivery care among disadvantaged  
9 women despite health system wide efforts and improvements in **the** socio demographic  
10 profile of the population.
- 11 • The results call for equity oriented research and policies to close the wide gap in skilled  
12 care at birth in the Philippines and to determine the success factors in the reduction of  
13 inequality in **antenatal-care** use.

### 14 **Strengths and Limitations:**

- 15 • **This is the first study of long-term trends in inequalities in utilization of critical maternal**  
16 **health interventions using four comparable, nationally-representative Demographic**  
17 **Health Survey (DHS) datasets commonly used as data sources in the literature.**
- 18 • **Comparability of the different survey years was achieved by selecting only the women**  
19 **who had live births within one year.**
- 20 • **The DHS wealth index was used to represent changes in socioeconomic inequalities**  
21 **through time.**

1  
2  
3 **1 ABSTRACT**  
4

5 **2 Objective:** To assess changes in the inequalities associated with maternal health care use  
6  
7 according to **economic status** in the Philippines.  
8  
9

10 **3 Design:** **An analysis of four, population-based datasets that were conducted** between 1993 and  
11  
12 2008.  
13  
14

15 **4 Setting:** Philippines.  
16  
17

18 **5 Participants:** Women aged 15-49 years who had a live birth within one year in 1993 (n=1707),  
19  
20 1998 (n=1513), 2003 (n=1325), and 2008 (n=1209).  
21  
22

23 **6 Outcomes:** **At least 4 visit of antenatal care**, skilled birth attendance and delivery in a medical  
24  
25 facility.  
26  
27

28 **7 Results:** **The adjusted odds ratio (OR) for antenatal-care use when comparing the highest wealth**  
29  
30 **index quintile with the lowest quintile declined from 1993 to 2008: 3.43 (95% confidence**  
31  
32 **interval (CI) 2.22-5.28) to 2.87 (95%CI 1.31-6.29). On the other hand, the adjusted OR for the**  
33  
34 **other two outcome indicators by the wealth index widened from 1993 to 2008: 9.92 (95%CI**  
35  
36 **5.98-16.43) to 15.53 (95%CI 6.90-34.94) for skilled birth attendance; and 7.74 (95%CI 4.22-**  
37  
38 **14.21) to 16.00 (95%CI 7.99-32.02) for delivery in a medical facility. The concentration index**  
39  
40 **for maternal health utilization in 1993 and 2008 were 0.19 and 0.09 for antenatal care; 0.26 and**  
41  
42 **0.24 for skilled birth attendance; and 0.41 and 0.35 for delivery in a medical facility.**  
43  
44  
45  
46  
47  
48  
49  
50  
51  
52  
53  
54  
55  
56  
57  
58  
59  
60

1  
2  
3  
4  
5  
6  
7  
8  
9  
10  
11  
12  
13  
14  
15  
16  
17  
18  
19  
20  
21  
22  
23  
24  
25  
26  
27  
28  
29  
30  
31  
32  
33  
34  
35  
36  
37  
38  
39  
40  
41  
42  
43  
44  
45  
46  
47  
48  
49  
50  
51  
52  
53  
54  
55  
56  
57  
58  
59  
60

1  
2 **Conclusion:** Over a 16-year period, gradients in antenatal care use decreased and high level of  
3 inequalities in skilled birth attendance and delivery in a medical facility persisted. **The results**  
4 **showed a disproportionate use of institutional care at birth among disadvantaged Filipino women.**

For peer review only

## INTRODUCTION

Globally, there is an increasing concern regarding inequities in maternal health, especially in developing countries. [1] The slow pace of reduction in maternal mortality rates despite cost-effective solutions has urged the international community to look beyond accomplishing national targets and to begin addressing wide disparities in women's health. [2]

The key to realizing equity in maternal health is the achievement of equity in key maternal health coverage, such as antenatal care (ANC) and skilled birth attendance (SBA). A previous study indicated the greatest inequity in SBA coverage followed by ANC of more than four visits. [3] Wide inequalities in these interventions have hindered the reduction by 0.75 of maternal mortality ratio from 1990 to 2015. [4 – 6]

The Philippines has made efforts to improve women's health as mandated in its constitution and as a signatory to several women's international conventions including the Millennium Development Goals (MDG). National laws passed include the Magna Carta of Women (RA 9710), Maternity Benefits in Favor of Women Workers in the Private Sector (RA 7322), and Maternal Package for Normal Spontaneous Vaginal Delivery of the Philippine Health Insurance Corporation (PhilHealth). Starting 1995, the Philippine government has also implemented a number of maternal health programs, including two Women's Health and Safe Motherhood Projects. [7] Health system reforms to reduce maternal and neonatal mortality were also spearheaded through the Department of Health Administrative Order No. 2008-0029 resulting to the Integrated Maternal, Neonatal and Child Health and Nutrition Strategy (MNCHN). Specific

1 reproductive health indicators of MNCHN to be met in 2010 include (1) an increase in modern  
2 contraceptive prevalence rate to 60%, (2) an increase in the proportion of pregnant women  
3 having at least four ANC visits to 80%, and (3) an increase in SBA and facility-based births to  
4 80%.

5  
6 There is, however, uncertainty regarding whether and how these maternal health policies and  
7 programs have substantially reduced gaps in the use of key maternal interventions among women  
8 from varying socioeconomic backgrounds through time. The Philippines is currently off track  
9 and slow in achieving MDG-5. In 2010, the estimated maternal mortality ratio was 99 per  
10 100000 live births, compared to the goal of 52 per 100000 live births in 2015. [8] This slow  
11 achievement of national targets indicates wide economic and regional inequalities in maternal  
12 and child health services. [9] The objective of this study was to assess the changes in inequalities  
13 in ANC, SBA, and delivery in medical facility (MEDFAC) in the Philippines between 1993 and  
14 2008 according to women's residence, woman's education, partner's education, wealth index,  
15 woman's age and birth order.

## 1 DATA AND METHODS

### 3 Data Source

5 This study was performed using the data from the Philippine Demographic and Health Survey  
6 (PDHS) conducted for the periods of 1993, 1998, 2003, and 2008. All were nationally  
7 representative household surveys overseen by the National Statistics Office and National  
8 Steering Committee with financial and technical support from the United States Agency for  
9 International Development. [10] PDHS gathers detailed information on population, health, and  
10 nutrition to assist in the country's monitoring and impact evaluation. It ensures comparability  
11 across countries and time by developing standard model questionnaires, extensive survey  
12 procedures, interviewer training, and data processing guidelines. [11, 12]

14 The 1993 and 1998 PDHS employed a two-stage sample design, representing 14 regions and 16  
15 regions, respectively. A sample of 13700 households (response rate: 99.2%) was randomly  
16 selected from 750 primary sampling units (PSUs) for 1993 and a sample of 13708 households  
17 (response rate: 98.7%) was randomly selected from 755 PSUs for 1998. The 2003 and 2008  
18 PDHS followed a stratified three-stage cluster sample design representing 17 regions. A sample  
19 of 13914 households (response rate: 99.1%) was randomly selected from 819 PSUs for 2003 and  
20 a sample of 13764 households (response rate: 99.3%) was randomly selected from 794 PSUs for  
21 2008. Detailed descriptions of the study design and methods of data collection are accessible  
22 online in household survey reports. [13 – 16]

## 1           2 3           1   **Subjects** 4 5 6           2

7  
8           3   The numbers of women interviewed were as follows: 1993,  $n = 15029$ ; 1998,  $n = 13983$ ; 2003,  $n$   
9           4   = 13633; and 2008,  $n = 13594$ . The average response rate was 98%. The subjects we included in  
10           5   the analysis were women aged 15-49 years who had a live birth within one year, resulting in final  
11           6   sample sizes of 1707 in 1993, 1513 in 1998, 1325 in 2003, and 1209 in 2008.  
12  
13  
14

## 15 16 17 18 19 20           8   **Study Variables** 21 22           9

23  
24           10   Three dependent variables were measured in the present study: (1) at least four antenatal  
25           11   consultations; (2) assistance by professional health personnel during delivery—either a doctor,  
26           12   nurse, or midwife, excluding traditional birth attendants (*hilot*), relatives, or friends; and (3)  
27           13   whether the birth occurred at home or in a medical facility (public or private).  
28  
29  
30  
31  
32  
33  
34  
35

36           15   The Demographic and Health Survey (DHS) wealth index is defined as a composite measure of a  
37           16   household's relative economic status by using the data in the DHSs. It is calculated by using data  
38           17   on a household's ownership of selected assets such as television or car, persons per sleeping  
39           18   room, ownership of agricultural land, domestic servant and other country specific items. [17] The  
40           19   asset quintile was derived from this DHS wealth index score of women who had a live birth  
41           20   within one year categorized into lowest, second, middle, fourth and highest, in respective survey  
42           21   years.  
43  
44  
45  
46  
47  
48  
49  
50  
51  
52

53           22  
54  
55  
56  
57  
58  
59  
60



1  
2  
3 1 Other independent variables were type of residence (urban or rural), woman's age (< 20, 20 – 29,  
4  
5 2 30 – 39, ≥ 40), birth order (1, 2, 3, ≥ 4), and educational level of woman and her partner (none,  
6  
7 3 primary, secondary, higher).  
8  
9  
10  
11  
12

### 13 **Ethical Review**

14  
15  
16

17 7 As protocols for all demographic health household surveys, the four PDHS were submitted for  
18 8 ethical reviews to the ICF Institutional Review Board (Calverton, MD) and an institutional  
19 9 review board or ethics review panel in the Philippines for approving research studies on human  
20 10 subjects. [18]  
21  
22  
23  
24  
25  
26  
27  
28

### 29 **Statistical Analysis**

30  
31  
32  
33

34 14 Changes in the socio demographic profile and use of ANC, SBA, and MEDFAC of the  
35 15 population were analyzed from household survey data in 1993, 1998, 2003, and 2008. Tests for  
36 16 trends were performed using the Mantel–Haenszel linear-by-linear association chi squared test.  
37 17 Crude and adjusted odds ratios between each dependent variable and all of the independent  
38 18 variables were assessed by multivariate logistic regression analysis. Complex household survey  
39 19 design was taken into account in all analyses using a sampling weight. All the missing data were  
40 20 excluded in the analysis. All analyses were performed using StataMP 11 Statistical Software  
41 21 (Stata Corp., College Station, TX).  
42  
43  
44  
45  
46  
47  
48  
49  
50  
51  
52  
53  
54  
55  
56  
57  
58  
59  
60

1  
2  
3 1 Inequalities of each outcome variable according to the wealth index were estimated using the  
4  
5 2 concentration index. It is defined as twice the area between the concentration curve and the line  
6  
7  
8 3 of equality (the 45-degree line) and was used to determine the magnitude of inequality. A  
9  
10 4 concentration index of 0 indicates perfect equality. A measure of 1 (or -1) indicates perfect  
11  
12  
13 5 inequality. [19, 20]  
14  
15  
16  
17  
18  
19  
20 8  
21  
22 9  
23  
24  
25  
26  
27  
28  
29  
30  
31  
32  
33  
34  
35  
36  
37  
38  
39  
40  
41  
42  
43  
44  
45  
46  
47  
48  
49  
50  
51  
52  
53  
54  
55  
56  
57  
58  
59  
60

For peer review only

## 1 RESULTS

2  
3 There were changes in socio demographic profile of the population from 1993 to 2008. (Table 1)

4 The percentage of women with secondary and higher education increased during this period from  
5 58.7% in 1993 to 74.6% in 2008. A corresponding increase was also observed in the percentage  
6 of partners who finished secondary and higher education from 57.4% in 1993 to 70.7% in 2008.

7 The percentage of women who have four or more children declined from 39.9% in 1993 to  
8 31.7% in 2008.

**Table 1** Socio demographic characteristics and childbirth history of women aged 15-49 years, per survey year, Philippines, 1993-2008

| Indicator                  | 1993<br>n=1707<br>% | 1998<br>n=1513<br>% | 2003<br>n=1325<br>% | 2008<br>n=1209<br>% |
|----------------------------|---------------------|---------------------|---------------------|---------------------|
| <b>Residence</b>           |                     |                     |                     |                     |
| Urban                      | 48.8                | 46.3                | 50.0                | 46.9                |
| Rural                      | 51.2                | 53.7                | 50.0                | 53.1                |
| <b>Woman's Education</b>   |                     |                     |                     |                     |
| None                       | 2.3                 | 1.8                 | 1.9                 | 1.2                 |
| Primary                    | 39.0                | 29.9                | 27.8                | 24.2                |
| Secondary                  | 37.4                | 39.7                | 42.5                | 50.3                |
| Higher                     | 21.3                | 28.6                | 27.8                | 24.3                |
| <b>Partner's Education</b> |                     |                     |                     |                     |
| None                       | 1.9                 | 1.6                 | 2.0                 | 1.9                 |
| Primary                    | 40.8                | 33.4                | 31.8                | 27.5                |
| Secondary                  | 37.3                | 36.7                | 40.1                | 45.0                |
| Higher                     | 20.1                | 28.3                | 26.1                | 25.7                |
| <b>Wealth Index</b>        |                     |                     |                     |                     |
| Lowest                     | 20.2                | 20.0                | 20.0                | 20.0                |
| Second                     | 19.8                | 20.0                | 20.1                | 20.0                |
| Middle                     | 20.0                | 20.0                | 20.0                | 20.1                |
| Fourth                     | 20.0                | 20.1                | 19.9                | 20.1                |
| Highest                    | 20.0                | 19.9                | 20.0                | 19.8                |
| <b>Woman's Age</b>         |                     |                     |                     |                     |
| <20                        | 5.6                 | 6.1                 | 7.2                 | 8.2                 |
| 20-29                      | 53.7                | 53.7                | 53.3                | 53.5                |
| 30-39                      | 35.6                | 35.1                | 34.4                | 32.5                |
| ≥40                        | 5.2                 | 5.1                 | 5.1                 | 5.8                 |
| <b>Birth Order</b>         |                     |                     |                     |                     |
| 1                          | 22.6                | 24.5                | 27.7                | 28.5                |
| 2                          | 20.7                | 21.1                | 23.6                | 24.6                |
| 3                          | 16.8                | 19.6                | 15.5                | 15.2                |
| ≥4                         | 39.9                | 34.8                | 33.2                | 31.7                |

1  
2  
3  
4 1 **Figure 1 shows that the** utilization of ANC and MEDFAC increased from 53.4% in 1993 to  
5  
6 2 74.8% in 2008 and from 30.7% in 1993 to 46.3% in 2008, respectively. However, there is a  
7  
8 3 limited change in utilization of SBA from 55.5% in 1993 to 63.3% in 2008.  
9  
10  
11  
12  
13  
14  
15  
16  
17  
18  
19  
20  
21  
22  
23  
24  
25  
26  
27  
28  
29  
30  
31  
32  
33  
34  
35  
36  
37  
38  
39  
40  
41  
42  
43  
44  
45  
46  
47  
48  
49  
50  
51  
52  
53  
54  
55  
56  
57  
58  
59  
60

For peer review only

1  
2  
3  
4  
5  
6  
7  
8  
9  
10  
11  
12  
13  
14  
15  
16  
17  
18  
19  
20  
21  
22  
23  
24  
25  
26  
27  
28  
29  
30  
31  
32  
33  
34  
35  
36  
37  
38  
39  
40  
41  
42  
43  
44  
45  
46  
47  
48  
49  
50  
51  
52  
53  
54  
55  
56  
57  
58  
59  
60

1 **Figure 1** Total percentage of antenatal care use, skilled birth attendance and delivery in a  
2 medical facility, 1993-2008  
3 **—◆—** Antenatal care, **··■··** Skilled birth attendance, **-▲-** Delivery at medical facility

For peer review only

1  
2  
3 1 As shown in Table 2, from 1993 to 2008, the rates of utilization of ANC, SBA and MEDFAC  
4  
5  
6 2 were higher for women who were educated, better off, resided in an urban area, and those with  
7  
8 3 educated partners than among their poorer and less educated counterparts. There was a decline in  
9  
10 4 the odds ratio of women in highest wealth quintile compared to the lowest in ANC from 1993 to  
11  
12 5 2008. The adjusted odds ratio (OR) for antenatal-care use when comparing the highest wealth  
13  
14 6 index quintile with the lowest quintile declined from 1993 to 2008: 3.43 (95% confidence  
15  
16 7 interval (CI) 2.22-5.28) to 2.87 (95%CI 1.31-6.29). On the other hand, the adjusted OR for the  
17  
18 8 other two outcome indicators by the wealth index widened from 1993 to 2008: 9.92 (95%CI  
19  
20 9 5.98-16.43) to 15.53 (95%CI 6.90-34.94) for skilled birth attendance; and 7.74 (95%CI 4.22-  
21  
22 10 14.21) to 16.00 (95%CI 7.99-32.02) for delivery in a medical facility.  
23  
24  
25  
26  
27  
28  
29  
30  
31  
32  
33  
34  
35  
36  
37  
38  
39  
40  
41  
42  
43  
44  
45  
46  
47  
48  
49  
50  
51  
52  
53  
54  
55  
56  
57  
58  
59  
60

1 **Table 2** Adjusted odd ratios of the association between **wealth index** and socio demographic characteristics and antenatal care, skilled birth attendance or delivery in medical facility of women age 15-49 years,  
 2 Philippines, 1993(n=1707), 1998(n=1513), 2003(n=1325), 2008(n=1209)

| Indicator                  | Antenatal Care |            |         |            | Skilled Birth Attendance |            |         |            | Delivery at medical facility |            |        |            |         |            |        |            |         |            |            |            |         |            |            |            |
|----------------------------|----------------|------------|---------|------------|--------------------------|------------|---------|------------|------------------------------|------------|--------|------------|---------|------------|--------|------------|---------|------------|------------|------------|---------|------------|------------|------------|
|                            | 1993           | 1998       | 2003    | 2008       | 1993                     | 1998       | 2003    | 2008       | 1993                         | 1998       | 2003   | 2008       |         |            |        |            |         |            |            |            |         |            |            |            |
|                            | OR             | 95% CI     | OR      | 95% CI     | OR                       | 95% CI     | OR      | 95% CI     | OR                           | 95% CI     | OR     | 95% CI     | OR      | 95% CI     | OR     | 95% CI     | OR      | 95% CI     | OR         | 95% CI     | OR      | 95% CI     | OR         | 95% CI     |
| <b>Residence</b>           |                |            |         |            |                          |            |         |            |                              |            |        |            |         |            |        |            |         |            |            |            |         |            |            |            |
| Urban                      | 1.29*          | 1.02, 1.62 | 1.44**  | 1.08, 1.93 | 1.70***                  | 1.26, 2.28 | 0.99    | 0.71, 1.38 | 2.59**                       | 2.03, 3.31 | 3.08** | 2.27, 4.18 | 3.21*** | 2.37, 4.34 | 2.11** | 1.52, 2.93 | 3.12*** | 2.35, 4.12 | 2.43**     | 1.77, 3.35 | 1.90*** | 1.41, 2.56 | 1.47*      | 1.07, 2.02 |
| Rural (Reference)          | 1.00           |            | 1.00    |            | 1.00                     |            | 1.00    |            | 1.00                         |            | 1.00   |            | 1.00    |            | 1.00   |            | 1.00    |            | 1.00       |            | 1.00    |            | 1.00       |            |
| <b>Woman's Education</b>   |                |            |         |            |                          |            |         |            |                              |            |        |            |         |            |        |            |         |            |            |            |         |            |            |            |
| None                       | 0.58           | 0.27, 1.26 | 0.55    | 0.21, 1.45 | 0.25**                   | 0.09, 0.71 | 0.08*** | 0.02, 0.36 | 0.17*                        | 0.05, 0.65 | 0.70   | 0.21, 2.39 | 0.22**  | 0.08, 0.66 | 0.66   | 0.14, 3.21 | 0.17    | 0.02, 1.94 | 0.48       | 0.11, 2.00 | 0.09*   | 0.01, 1.01 | 0.82       | 0.09, 7.51 |
| Primary                    | 0.54**         | 0.37, 0.79 | 0.46*** | 0.29, 0.74 | 0.53**                   | 0.34, 0.85 | 0.38*** | 0.21, 0.68 | 0.43**                       | 0.27, 0.67 | 0.67   | 0.39, 1.12 | 0.48**  | 0.30, 0.78 | 0.69   | 0.40, 1.19 | 0.58**  | 0.38, 0.88 | 0.52*      | 0.31, 0.86 | 0.44*** | 0.28, 0.70 | 0.60       | 0.35, 1.03 |
| Secondary                  | 0.67*          | 0.47, 0.95 | 0.65*   | 0.44, 0.97 | 0.69                     | 0.46, 1.03 | 0.59**  | 0.36, 0.96 | 0.58*                        | 0.38, 0.88 | 0.86   | 0.56, 1.34 | 0.57    | 0.37, 0.89 | 0.89   | 0.56, 1.41 | 0.59**  | 0.41, 0.84 | 0.54**     | 0.37, 0.78 | 0.49*** | 0.34, 0.70 | 0.77       | 0.53, 1.13 |
| Higher (Reference)         | 1.00           |            | 1.00    |            | 1.00                     |            | 1.00    |            | 1.00                         |            | 1.00   |            | 1.00    |            | 1.00   |            | 1.00    |            | 1.00       |            | 1.00    |            | 1.00       |            |
| <b>Partner's Education</b> |                |            |         |            |                          |            |         |            |                              |            |        |            |         |            |        |            |         |            |            |            |         |            |            |            |
| None                       | 0.39*          | 0.16, 0.94 | 0.30*   | 0.10, 0.85 | 0.41                     | 0.16, 1.05 | 0.55    | 0.19, 1.58 | 0.09*                        | 0.01, 0.71 | 0.02** | 0.00, 0.20 | 0.22**  | 0.08, 0.61 | 0.06*  | 0.01, 0.61 | 0.28    | 0.03, 2.54 | ¶(omitted) |            | 0.11    | 0.01, 1.11 | ¶(omitted) |            |
| Primary                    | 0.53***        | 0.36, 0.78 | 0.67    | 0.43, 1.03 | 0.54**                   | 0.34, 0.86 | 0.65    | 0.37, 1.13 | 0.65                         | 0.42, 1.02 | 0.47*  | 0.29, 0.78 | 0.53**  | 0.33, 0.86 | 0.41** | 0.23, 0.71 | 0.36*** | 0.23, 0.55 | 0.30**     | 0.19, 0.42 | 0.55*   | 0.34, 0.87 | 0.50*      | 0.30, 0.83 |
| Secondary                  | 0.74           | 0.52, 1.05 | 0.75    | 0.52, 1.09 | 0.68                     | 0.45, 1.02 | 0.75    | 0.45, 1.24 | 0.74                         | 0.50, 1.11 | 0.78   | 0.51, 1.19 | 0.66    | 0.43, 1.04 | 0.66   | 0.40, 1.07 | 0.58**  | 0.41, 0.83 | 0.46**     | 0.32, 0.65 | 0.72    | 0.50, 1.04 | 0.85       | 0.57, 1.27 |
| Higher (Reference)         | 1.00           |            | 1.00    |            | 1.00                     |            | 1.00    |            | 1.00                         |            | 1.00   |            | 1.00    |            | 1.00   |            | 1.00    |            | 1.00       |            | 1.00    |            | 1.00       |            |
| <b>Woman's Age</b>         |                |            |         |            |                          |            |         |            |                              |            |        |            |         |            |        |            |         |            |            |            |         |            |            |            |
| <20                        | 0.91           | 1.02, 1.62 | 0.45**  | 0.27, 0.74 | 1.12                     | 0.66, 1.90 | 0.91    | 0.52, 1.58 | 0.93                         | 0.54, 1.61 | 0.70   | 0.39, 1.26 | 0.89    | 0.52, 1.53 | 0.92   | 0.51, 1.66 | 0.88    | 0.46, 1.71 | 0.73       | 0.34, 1.57 | 0.70    | 0.41, 1.20 | 0.74       | 0.42, 1.31 |
| 20-29 (Reference)          | 1.00           |            | 1.00    |            | 1.00                     |            | 1.00    |            | 1.00                         |            | 1.00   |            | 1.00    |            | 1.00   |            | 1.00    |            | 1.00       |            | 1.00    |            | 1.00       |            |
| 30-39                      | 1.29           | 0.98, 1.69 | 1.86*** | 1.34, 2.58 | 1.20                     | 0.86, 1.66 | 1.42    | 0.98, 2.04 | 1.17                         | 0.86, 1.60 | 1.59*  | 1.10, 2.29 | 1.31    | 0.92, 1.89 | 1.54*  | 1.03, 2.30 | 1.36    | 0.98, 1.91 | 1.26       | 0.85, 1.85 | 1.46**  | 1.03, 2.07 | 1.59*      | 1.05, 2.40 |
| ≥40                        | 1.41           | 0.84, 2.39 | 1.66    | 0.94, 2.91 | 0.87                     | 0.46, 1.62 | 0.92    | 0.49, 1.70 | 1.96*                        | 1.07, 3.57 | 1.56   | 0.81, 2.99 | 0.87    | 0.42, 1.83 | 3.12*  | 1.48, 6.58 | 1.96    | 0.97, 3.97 | 2.02       | 0.98, 4.15 | 1.04    | 0.47, 2.32 | 3.44**     | 1.69, 6.98 |
| <b>Birth Order</b>         |                |            |         |            |                          |            |         |            |                              |            |        |            |         |            |        |            |         |            |            |            |         |            |            |            |
| 1 (Reference)              | 1.00           |            | 1.00    |            | 1.00                     |            | 1.00    |            | 1.00                         |            | 1.00   |            | 1.00    |            | 1.00   |            | 1.00    |            | 1.00       |            | 1.00    |            | 1.00       |            |
| 2                          | 0.76           | 0.55, 1.06 | 0.88    | 0.60, 1.30 | 0.84                     | 0.57, 1.25 | 0.79    | 0.50, 1.27 | 0.76                         | 0.53, 1.11 | 0.61*  | 0.40, 0.93 | 0.76    | 0.49, 1.17 | 0.87   | 0.57, 1.33 | 0.53*** | 0.35, 0.78 | 0.52*      | 0.33, 0.80 | 0.50*** | 0.34, 0.74 | 0.56*      | 0.37, 0.84 |
| 3                          | 0.64*          | 0.45, 0.93 | 0.64*   | 0.42, 0.97 | 0.92                     | 0.59, 1.45 | 0.55**  | 0.33, 0.92 | 0.50**                       | 0.33, 0.76 | 0.75   | 0.47, 1.18 | 0.69    | 0.42, 1.13 | 0.61   | 0.36, 1.02 | 0.36*** | 0.23, 0.55 | 0.72       | 0.44, 1.16 | 0.45*** | 0.29, 0.70 | 0.37**     | 0.23, 0.61 |



|                           |             |               |             |               |            |               |            |               |             |                |              |                |             |                |              |                |             |                |             |                |             |                |              |                |
|---------------------------|-------------|---------------|-------------|---------------|------------|---------------|------------|---------------|-------------|----------------|--------------|----------------|-------------|----------------|--------------|----------------|-------------|----------------|-------------|----------------|-------------|----------------|--------------|----------------|
| <b>≥4</b>                 | 0.41<br>*** | 0.30,<br>0.58 | 0.36<br>*** | 0.24,<br>0.54 | 0.56<br>** | 0.36,<br>0.87 | 0.53<br>** | 0.32,<br>0.88 | 0.47*<br>** | 0.32,<br>0.69  | 0.31*<br>**  | 0.20,<br>0.49  | 0.51<br>**  | 0.31,<br>0.82  | 0.47*<br>*   | 0.28,<br>0.80  | 0.32<br>*** | 0.21,<br>0.49  | 0.41*<br>** | 0.25,<br>0.67  | 0.28<br>*** | 0.18,<br>0.45  | 0.23*<br>**  | 0.13,<br>0.38  |
| <b>Wealth Index</b>       |             |               |             |               |            |               |            |               |             |                |              |                |             |                |              |                |             |                |             |                |             |                |              |                |
| <b>Lowest (Reference)</b> | 1.00        |               | 1.00        |               | 1.00       |               | 1.00       |               | 1.00        |                | 1.00         |                | 1.00        |                | 1.00         |                | 1.00        |                | 1.00        |                | 1.00        |                | 1.00         |                |
| <b>Second</b>             | 1.09        | 0.79,<br>1.50 | 1.21        | 0.86,<br>1.70 | 0.85       | 0.59,<br>1.24 | 1.48       | 0.99,<br>2.20 | 2.00*<br>** | 1.38,<br>2.89  | 1.99*<br>**  | 1.34,<br>2.96  | 2.06<br>*** | 1.36,<br>3.13  | 1.74*<br>*   | 1.14,<br>2.64  | 2.11<br>**  | 1.16,<br>3.83  | 1.88*<br>*  | 1.07,<br>3.29  | 2.15<br>**  | 1.25,<br>3.71  | 1.79*<br>*   | 1.05,<br>3.05  |
| <b>Middle</b>             | 1.26        | 0.89,<br>1.78 | 1.85<br>**  | 1.26,<br>2.72 | 0.77       | 0.51,<br>1.16 | 1.25       | 0.80,<br>1.96 | 3.30*<br>** | 2.26,<br>4.83  | 4.05*<br>**  | 2.63,<br>6.24  | 2.95<br>*** | 1.88,<br>4.64  | 3.43*<br>**  | 2.18,<br>5.34  | 2.83<br>*** | 1.58,<br>5.07  | 2.31*<br>*  | 1.29,<br>4.14  | 3.01<br>*** | 1.73,<br>5.22  | 3.46*<br>**  | 2.02,<br>5.91  |
| <b>Fourth</b>             | 1.68<br>**  | 1.16,<br>2.43 | 2.25<br>*** | 1.45,<br>3.52 | 1.12       | 0.70,<br>1.81 | 2.06<br>** | 1.19,<br>3.57 | 4.71*<br>** | 3.11,<br>7.13  | 7.17*<br>**  | 4.33,<br>11.86 | 4.87<br>*** | 2.90,<br>8.19  | 7.20*<br>**  | 4.22,1<br>2.30 | 4.50<br>*** | 2.50,<br>8.13  | 4.29*<br>** | 2.38,<br>7.74  | 4.07<br>*** | 2.32,<br>7.13  | 6.09*<br>**  | 3.41,<br>10.89 |
| <b>Highest</b>            | 3.43<br>*** | 2.22,<br>5.28 | 3.54<br>*** | 1.98,<br>6.33 | 2.44<br>** | 1.31,<br>4.54 | 2.87<br>** | 1.31,<br>6.29 | 9.92*<br>** | 5.98,<br>16.43 | 12.29<br>*** | 6.22,<br>24.27 | 6.98<br>*** | 3.62,<br>13.46 | 15.53<br>*** | 6.90,<br>34.94 | 7.74<br>*** | 4.22,<br>14.21 | 7.55*<br>** | 3.95,<br>14.44 | 6.98<br>*** | 3.76,<br>12.94 | 16.00<br>*** | 7.99,<br>32.02 |

\* p<0.05; \*\* p<0.01; \*\*\* p<0.001

Adjusted for residence, woman's education, partner's education, women' age and birth order.

¶All subject in this category did not deliver in medical facility and removed from analysis.

For peer review only

1  
2  
3 1 Figure 2 shows that there was a marked reduction in inequality of ANC from 1993 to 2008.  
4  
5 2 Although gradients of its use among women with no education and women with higher  
6  
7 3 education widened from 1993 to 2008, the gradients of ANC use among women with primary  
8  
9 4 education and women with higher education as their highest educational attainment decreased  
10  
11 5 from a difference of 40.4% in 1993 to 31.6% in 2008. A marked reduction was seen among  
12  
13  
14 6 women in the highest quintile compared to those in the lowest quintile, with a difference of  
15  
16 7 48.2% in 1993 decreasing to 35.0% in 2008. A reduction in the concentration index from  
17  
18 8 1993 to 2008 of ANC was observed.  
19  
20  
21  
22  
23  
24  
25  
26  
27  
28  
29  
30  
31  
32  
33  
34  
35  
36  
37  
38  
39  
40  
41  
42  
43  
44  
45  
46  
47  
48  
49  
50  
51  
52  
53  
54  
55  
56  
57  
58  
59  
60

1 **Figure 2** Trends in the percentage of antenatal care use by (a) woman's education, (b)  
2 partner's education, (c) **wealth index**, 1993-2008

3 Part a: -◆- None, -■- Primary, ···▲·· Secondary, -×- Higher

4 Part b: -◆- None, -■- Primary, ···▲·· Secondary, -×- Higher

5 Part c: -◆- Lowest -■- Second, -▲- Middle, ···×··· Fourth, -×- Highest

6 Note: Concentration Index 0.19, 95% CI 0.16 to 0.21 in 1993; Concentration Index 0.18, 95%  
7 CI 0.16 to 0.21 in 1998; Concentration Index 0.12, 95% CI 0.09 to 0.14 in 2003;  
8 Concentration Index 0.09, 95% CI 0.07 to 0.11 in 2008

1  
2  
3 1 Figure 3 shows the limited changes in the inequality of SBA from 1993 to 2008. A reduction  
4  
5 2 was observed in the gradient of SBA in comparison between women with no education and  
6  
7 3 those with higher education with a difference of 76.6% in 1993 decreasing to 70.7% in 2008.  
8  
9  
10 4 Reverse direction of the difference was observed between women in the highest quintile  
11  
12 5 compared to those in the lowest quintile from a difference of 69.1% in 1993 increasing to  
13  
14 6 71.1% in 2008. A reduction in the concentration index from 1993 to 2008 of SBA was  
15  
16 7 observed, however the concentration index obtained was larger than that of ANC.  
17  
18  
19  
20  
21  
22  
23  
24  
25  
26  
27  
28  
29  
30  
31  
32  
33  
34  
35  
36  
37  
38  
39  
40  
41  
42  
43  
44  
45  
46  
47  
48  
49  
50  
51  
52  
53  
54  
55  
56  
57  
58  
59  
60

1 **Figure 3** Trends in the percentage of skilled birth attendance by (a) woman's education, (b)  
2 partner's education, (c) **wealth index**, 1993-2008

3 Part a: -◆- None, -■- Primary, ···▲·· Secondary, -×- Higher

4 Part b: -◆- None, -■- Primary, ···▲·· Secondary, -×- Higher

5 Part c: -◆- Lowest, -■- Second, -▲- Middle, ···×··· Fourth, -×- Highest

6 Note: Concentration Index 0.26, 95% CI 0.24 to 0.29 in 1993; Concentration Index 0.29, 95%  
7 CI 0.26 to 0.31 in 1998; Concentration Index 0.22, 95% CI 0.20 to 0.24 in 2003;  
8 Concentration Index 0.24, 95% CI 0.21 to 0.27 in 2008

1  
2  
3 1 Figure 4 shows the changes in inequality of MEDFAC from 1993 to 2008. As shown in the  
4  
5 2 figure, the gradient of MEDFAC between women with no education and those with higher  
6  
7 3 education widened from a difference of 60.4% in 1993 to 67.0% in 2008. The same  
8  
9 4 increasing direction for difference in use between women in the highest quintile compared to  
10  
11 5 those in the poorest quintile, with a difference of 59.5% in 1993 decreasing to 75.6% in 2008.  
12  
13  
14 6 A reduction in the concentration index from 1993 to 2008 of MEDFAC was observed,  
15  
16 7 however the concentration index obtained was also large in comparison to ANC.  
17  
18  
19  
20  
21  
22  
23  
24  
25  
26  
27  
28  
29  
30  
31  
32  
33  
34  
35  
36  
37  
38  
39  
40  
41  
42  
43  
44  
45  
46  
47  
48  
49  
50  
51  
52  
53  
54  
55  
56  
57  
58  
59  
60

1 **Figure 4** Trends in the percentage of delivery at medical facility by (a) woman's education,  
2 (b) partner's education, (c) **wealth index**, 1993-2008

3 Part a: -◆- None, -■- Primary, ···▲·· Secondary, -×- Higher

4 Part b: -◆- None, -■- Primary, ···▲·· Secondary, -×- Higher

5 Part c: -◆- Lowest -■- Second, -▲- Middle, ···×··· Fourth, -×- Highest

6 Note: Concentration Index 0.41, 95% CI 0.38 to 0.45 in 1993; Concentration Index 0.41, 95%  
7 CI 0.38 to 0.44 in 1998; Concentration Index 0.34, 95% CI 0.31 to 0.37 in 2003;  
8 Concentration Index 0.35, 95% CI 0.32 to 0.38 in 2008

## 1 DISCUSSION

2 This is the first study to describe the time trends in the inequalities of maternal health care  
3 utilization in the Philippines. The analysis of four nationally representative PDHS survey data  
4 sets ranging over a period of 16 years from 1993 to 2008 and showed a substantial increase in  
5 antenatal coverage and limited improvement in professional delivery care. Furthermore, our  
6 findings demonstrated reduction in the inequality of ANC use through time suggesting  
7 coverage of women in the lowest quintile or possibly decreased coverage for the wealthier  
8 quintile. The study also provided evidence of persistence of inequality in SBA and MEDFAC  
9 indicating minimal professional delivery care among women under lowest socioeconomic  
10 conditions.

11  
12 Our findings are in the line with evidence on 25 low income countries referred inequalities on  
13 institutional delivery rates as well as a weak health system and lack of skilled birth workers  
14 as the main barriers of use. [21] Marked underutilization of SBA has been noted among poor  
15 women in many studies. [22-23] However, one study conducted in India reported low  
16 utilization of both ANC and SBA among poor women through time despite of governmental  
17 interventions. [24]

18  
19 The increase of proportion of antenatal coverage from 1993 to 2008 was greater than that of  
20 proportion of births attended by skilled health personnel or that of delivery at a medical  
21 facility. Over the last several decades, the Philippine government has launched maternal  
22 health projects and programs to improve women's health. These were implemented alongside  
23 extensive health system reforms across the country on health financing, health regulation,  
24 health service delivery, and good governance in health following decentralization of health  
25 care services. [25] A study indicated that implementation areas that have intensively adopted



1 the health system-wide reforms have improved overall maternal health outcomes compared to  
2 those that have not adopted. However, the poorly developed health information systems and  
3 lack of referral emergency care facilities in remote coastal and isolated mountain  
4 communities were the challenges that remain to be addressed. [26]

5  
6 The results of the present study indicated reductions in the inequality of ANC use. This  
7 translates to substantial ANC use among women under lowest living standard quintile. This  
8 can be explained by improvements in both the health care system and in the socio  
9 demographic profile of the population. The **PhilHealth** has been reported to increase uptake  
10 and standards of ANC. [27] Improvements in the quality of services in health care institutions  
11 through accreditation and the covering of financial costs by insurance contributed to the  
12 increased use of ANC by Filipino women regardless of socio demographic status. [27, 28]  
13 There was also an increase in the total number of midwives and rural (*barangay*) health units  
14 through the years, which addressed the problems of distance and lack of availability of health  
15 workers and ANC facilities. [29] Moreover, positive changes in socio demographic and  
16 demographic profiles, such as increases in educational status of women and their partners,  
17 better economic status of women, and decreased fertility, may also explain the observed  
18 reductions in the inequality of ANC use. [30]

19  
20 Inequalities in SBA and MEDFAC persist in the Philippines despite health system-wide  
21 efforts and improvements in the socio demographic profile of the population. After 16 years,  
22 the majority of Filipino women from lowest living standard quintile continue to deliver at  
23 home without professional assistance. In the Philippines, financial, transportation, absence of  
24 companion to health facility, and treatment of health professionals to disadvantaged women  
25 are major barriers that must be addressed to increase the rate of hospital delivery. [31] The

1 majority of unskilled home deliveries among Filipino women occur near hospitals, and  
2 financial burden associated with hospital delivery is the main concern regardless of  
3 socioeconomic status. In 2009, families from the lowest 30% income group, delivery at a  
4 hospital would consume a minimum of 6.6% – 24.3% of the family's total annual income.  
5 [32, 33] This indicates that catastrophic financial costs are responsible for the decision by  
6 poorer Filipino women to deliver at home, even if they are close to health facilities in  
7 addition to low educational status and rural residence. PhilHealth coverage is low with only  
8 42% of families with at least one family member is enrolled in 2004. [34] Furthermore, the  
9 out of pocket expenditure as percentage of private expenditure on health has increased from  
10 77.2% in 2000 to 83.6% in 2010. [35]

11  
12 There are number of strengths in this study. The study used four nationally representative  
13 samples obtained by the DHSs commonly used as data sources in literatures worldwide. A  
14 national sample of women aged 15-49 years were collected to obtain a sufficient sample size  
15 for each survey year. Selection of the women who had live births only within one year as the  
16 subjects of the individual surveys sharpened the comparison of the data of four different years.  
17 This reduced the magnitude of recall bias by the respondents. All four PDHSs followed strict  
18 data quality checks through pre testing, translation of questionnaires to local dialect,  
19 interviewer training, and duplicate data entry. It also employed standardized questionnaire  
20 format which are carefully developed to ascertain accurate response and information from the  
21 participants. The analysis used the DHS wealth index, a systematically developed composite  
22 index to measure economic status of the subjects among the DHS samples. The study used  
23 relevant measurements of inequity, the concentration index, which measures the long term  
24 trends in inequalities in utilization of critical maternal health care interventions in the  
25 Philippines which is important for future health policy.

1  
2  
3 1  
4  
5 2 There should be a caution in interpreting trends of maternal health care use by the DHS  
6  
7 3 wealth index since it is an index to show a relative position measured by a composite  
8  
9  
10 4 economic status indicator among the subjects of the particular year and country. Therefore  
11  
12 5 the scores of wealth index in different years are not comparable.  
13  
14 6

15  
16 7 Our study implies the need to research solutions to reduce inequality in SBA and delivery at a  
17  
18 8 medical facility, and to determine the factors responsible for the persistence of inequality in  
19  
20 9 SBA and delivery at a medical facility despite government and non-governmental efforts.  
21  
22 10 Recognizing reproductive health as a basic right of women regardless of socio demographic  
23  
24 11 status is important in formulating national policy and programs to address inequality in  
25  
26 12 maternal health service utilization.  
27  
28  
29  
30  
31  
32  
33  
34  
35  
36  
37  
38  
39  
40  
41  
42  
43  
44  
45  
46  
47  
48  
49  
50  
51  
52  
53  
54  
55  
56  
57  
58  
59  
60

1  
2  
3 1 **ACKNOWLEDGEMENTS**  
4

5 2

6  
7 3 We are thankful to MEASURE DHS for allowing us to analyze the 1993, 1998, 2003 and  
8 4 2008 PDHS datasets. We also acknowledge with deepest thankfulness the organizations and  
9 5 individuals in the Philippines who contributed to the 1993, 1998, 2003 and 2008 PDHS.  
10 6

11 7 **COMPETING INTERESTS**  
12 8

13 9

14 10 The authors declare that they have no competing interests.  
15 11

16 12 **FUNDING**  
17 13

18 14

19 15 This research received no specific grant from any funding agency in the public, commercial  
20 16 or not-for-profit sectors.  
21 17

22 18

23 19 **CONTRIBUTORSHIP**  
24 20

25 21

26 22 FM and KN conceptualized and designed the study. FM obtained and FM and MK analyzed  
27 23 the data. FM, KN, MK, and KS structured and edited the manuscript. All authors approved  
28 24 the final manuscript.  
29 25

30 26

31 27 **DATA SHARING**  
32 28

33 29

34 30 There are no additional unpublished data from the study.  
35 31  
36 32  
37 33  
38 34  
39 35  
40 36  
41 37  
42 38  
43 39  
44 40  
45 41  
46 42  
47 43  
48 44  
49 45  
50 46  
51 47  
52 48  
53 49  
54 50  
55 51  
56 52  
57 53  
58 54  
59 55  
60 56

1  
2  
3 **REFERENCES**  
4

- 5 1. Commission on information and accountability for Women's and Children's Health.  
6 Keeping promises, measuring results. World Health Organization; 2011. Available  
7 from:  
8  
9  
10 [http://www.everywomaneverychild.org/images/content/files/accountability\\_commissi](http://www.everywomaneverychild.org/images/content/files/accountability_commissi)  
11 [on/final\\_report/Final\\_EN\\_Web.pdf](http://www.everywomaneverychild.org/images/content/files/accountability_commission/final_report/Final_EN_Web.pdf) (accessed March 2012).  
12  
13  
14  
15  
16 2. Thomsen S, Hoa Dt, [Målqvist M](#), et al. Promoting equity to achieve maternal and  
17 child health. *Reprod Health Matters* 2011;**19**(38):176-82.  
18  
19  
20 3. Barros AJ, Ronsmans C, Axelson H, et al. Equity in maternal, newborn and child  
21 health interventions in countdown to 2015: a retrospective review of survey data from  
22 54 countries. *Lancet* 2012;**379**(9822):1225-33.  
23  
24  
25 4. Zere E, Kirigia JM, Duale S, et al. Inequities in maternal and child health outcomes  
26 and interventions in Ghana. *BMC Public Health* 2012;**12**:252.  
27  
28  
29 5. Wirth M, Sacks E, Delamonica E, et al. "Delivering on the mdgs?": equity and  
30 maternal health in Ghana, Ethiopia and Kenya. *East Afr J Public Health*  
31 2008;**5**(3):133-41.  
32  
33  
34 6. Silal SP, Penn Kenana L, Harris B, et al. Exploring inequalities in access to and use of  
35 maternal health services in South Africa. *BMC Health Serv Res* 2012;**12**(1):120.  
36  
37  
38 7. Asian Development Bank Operations Evaluation Department. Project performance  
39 evaluation report in the Philippines. Asian Development Bank; 2007. Available from:  
40 <http://www.adb.org/sites/default/files/27010-PHI-PPER.pdf> (accessed January 2013)  
41  
42  
43 8. WHO, UNICEF, UNFPA, The World Bank. Trends in maternal mortality 1990-2010:  
44 WHO, UNICEF, UNFPA and The World Bank estimates. Geneva: World Health  
45 Organization; 2012. Available from:  
46  
47  
48  
49  
50  
51  
52  
53  
54  
55  
56  
57  
58  
59  
60

- 1  
2  
3 1 <http://www.unfpa.org/webdav/site/global/shared/documents/publications/2012/Trends>  
4  
5 2 [in\\_maternal\\_mortality\\_A4-1.pdf](#) (accessed March 2012).  
6  
7 3 9. [Lavado](#) RF, Lagrada LP. Are Maternal and Child Care Programs Reaching the  
8  
9 4 Poorest Regions in the Philippines? Philippine Institute for Developmental Studies.  
10  
11 5 2008 Nov; Discussion Paper Series No. 2008-30.  
12  
13 6 10. Demographic and Health Surveys [Internet]. Calverton: Macro International.  
14  
15 7 Available from: <http://www.measuredhs.com/> (accessed July 2011).  
16  
17 8 11. Rutstein SO, Rojas G. Guide to DHS statistics. Calverton, MD: ORC Macro,2003.  
18  
19 9 12. Croft T. DHS Data Editing and Imputation. Calverton, MD: ORC Macro International.  
20  
21 10 13. National Statistics Office (NSO) [Philippines] and Macro International Inc. (MI).1994.  
22  
23 11 National Demographic Survey 1993. Calverton, Maryland: NSO and MI.  
24  
25 12 14. National Statistics Office (NSO)], Department of Health (DOH) [Philippines] and  
26  
27 13 Macro International Inc. (MI).1999. National Demographic Survey 1998. Manila:  
28  
29 14 NSO and MI.  
30  
31 15 15. National Statistics Office (NSO) [Philippines], and ORC Macro. 2004. National  
32  
33 16 Demographic Survey 2003. Calverton, Maryland: NSO and ORC Macro.  
34  
35 17 16. National Statistics Office (NSO) [Philippines], and ICF Macro. 2009. National  
36  
37 18 Demographic Survey 2008. Calverton, Maryland: National Statistics Office and ICF  
38  
39 19 Macro.  
40  
41 20 17. Rutstein, SO, Kiersten J. 2004. The DHS Wealth Index. DHS Comparative Reports  
42  
43 21 No. 6. Calverton, Maryland: ORC Macro  
44  
45 22 18. Filmer D, Pritchett LH. Estimating wealth effects without expenditure data or tears:  
46  
47 23 an application to educational enrollments in states of India. *Demography* 2001,  
48  
49 24 **38**(1):115-132.  
50  
51  
52  
53  
54  
55  
56  
57  
58  
59  
60

- 1  
2  
3 1 19. O'Donnell O, van Doorslaer E, Wagstaff A, et al. Analyzing health equity using  
4  
5 2 household survey data: a guide to techniques and their implementation. Washington,  
6  
7 3 D.C: The World Bank; 2008. Available from:  
8  
9 4 [http://siteresources.worldbank.org/INTPAH/Resources/Publications/459843-  
10  
11 5 \[1195594469249/HealthEquityFINAL.pdf\]\(http://siteresources.worldbank.org/INTPAH/Resources/Publications/459843-1195594469249/HealthEquityFINAL.pdf\) \(accessed July 2011\).12  
13  
14 6 20. Wagstaff A. The concentration index of a binary outcome revisited. \*J Health Econ\*  
15  
16 7 2011;\*\*20\*\*\(10\):1155-60.  
17  
18 8 21. \[Limwattananon S\]\(#\), \[Tangcharoensathien V\]\(#\), \[Sirilak S\]\(#\). Trends and inequities in where  
19  
20 9 women delivered their babies in 25 low-income countries: evidence from  
21  
22 10 Demographic and Health Surveys. \*Reprod Health Matters\* 2011;\*\*19\*\*\(37\):75-85.  
23  
24 11 22. Zere E, Oluwole D, Kirigia JM, et al. Inequalities in skilled attendance at birth in  
25  
26 12 Namibia: a decomposition analysis. \*BMC Pregnancy Childbirth\* 2011;\*\*11\*\*:34.  
27  
28 13 23. Collin SM, Anwar I, Ronsmans C. \[A decade of inequality in maternity  
29  
30 14 care: antenatal care, professional attendance at delivery, and caesarean section in  
31  
32 15 \\[Bangladesh \\\(1991–2004\\\)\\]\\(#\\). \\*Int J Equity Health\\* 2007 Aug;\\*\\*6\\*\\*:9.  
33  
34 16 24. Pathak PK, Singh A, Subramanian SV. Economic Inequalities in maternal health care:  
35  
36 17 prenatal care and skilled birth attendance in India, 1992-2006. \\*PLoS One\\*  
37  
38 18 2010;\\*\\*5\\*\\*\\(10\\):e13593.  
39  
40 19 25. Lakshminarayanan, R. Decentralisation and its implications for reproductive health:  
41  
42 20 the Philippines experience. \\*Reprod Health Matters\\* 2003;\\*\\*11\\*\\*\\(21\\):96-107.  
43  
44 21 26. Huntington D, Banzon E, Recidoro ZD. A systems approach to improving maternal  
45  
46 22 health in the Philippines. \\*Bull World Health Organ\\* 2012;\\*\\*90\\*\\*\\(2\\):104-110.  
47  
48 23 27. Kozhimannil KB, Valera MR, Adams A, et al. The population-level impacts of a  
49  
50 24 national health insurance program and franchise midwife clinics on achievement of  
51  
52  
53  
54  
55  
56  
57  
58  
59  
60\]\(#\)](http://siteresources.worldbank.org/INTPAH/Resources/Publications/459843-1195594469249/HealthEquityFINAL.pdf)

- 1 prenatal and delivery care standards in the Philippines. *Health Policy* 2009;**92**(1):55-  
2 64.
- 3 28. Quimbo SA, Peabody JW, Shimkhada R, et al. Should we have confidence if a  
4 physician is accredited? A study of the relative impacts of accreditation and insurance  
5 payments on quality of care in the Philippines. *Soc Sci Med* 2008;**67**(4):505-10.
- 6 29. Department of Health. Vital, Health and Nutrition. Manila; National Statistical  
7 Coordination Board; 2012. Available from:  
8 [http://www.nscb.gov.ph/secstat/d\\_vital.asp](http://www.nscb.gov.ph/secstat/d_vital.asp) (accessed Mar 2012).
- 9 30. Simkhada B, Teijlingen ER, Porter M, et al. Factors affecting the utilization of  
10 antenatal in developing countries: a systematic review of the literature. *J Adv Nurs*  
11 2008;**61**(3):244-60.
- 12 31. Sobel HL, Oliveros YE, Nyunt US. Secondary analysis of a national health survey on  
13 factors influencing women in the Philippines to deliver at home and unattended by a  
14 healthcare professional. *Int J Gynaecol Obstet* 2010;**111**(2):157-60.
- 15 32. National Statistics Office. 2004 Annual Poverty Indicators Survey (APIS)  
16 (Preliminary Results). Manila:National Statistics Office; 23 Sept 2005. Available  
17 from: [http://www.census.gov.ph/content/2004-annual-poverty-indicators-survey-apis-](http://www.census.gov.ph/content/2004-annual-poverty-indicators-survey-apis-preliminary-results)  
18 [preliminary-results](http://www.census.gov.ph/content/2004-annual-poverty-indicators-survey-apis-preliminary-results) (accessed Jan 2013).
- 19 33. Ericta CN. Families in the bottom 30 percent income group earned 62 thousand pesos  
20 in 2009. Manila:National Statistics Office; 4 Feb 2011. Available from:  
21 <http://www.census.gov.ph/data/pressrelease/2011/ic09frtx.html> (accessed Mar 2012).
- 22 34. Tsolmongerel T. Costing study for selected hospitals in the Philippines. March 2009  
23 Available from:  
24 [http://www.doh.gov.ph/sites/default/files/Costing%20Study%20for%20Selected%20](http://www.doh.gov.ph/sites/default/files/Costing%20Study%20for%20Selected%20Hospitals%20in%20the%20Philippines.pdf)  
25 [Hospitals%20in%20the%20Philippines.pdf](http://www.doh.gov.ph/sites/default/files/Costing%20Study%20for%20Selected%20Hospitals%20in%20the%20Philippines.pdf) (accessed Mar 2012).



- 1  
2  
3 1 35. Global Health expenditure Database. Philippines National Expenditure on Health  
4  
5 2 (Philippine Peso) 1995-2010. World Health Organization; 2012. Available from:  
6  
7 3 [http://apps.who.int/nha/database/StandardReport.aspx?ID=REP\\_WEB\\_MINI\\_TEMP](http://apps.who.int/nha/database/StandardReport.aspx?ID=REP_WEB_MINI_TEMP)  
8  
9 4 [LATE\\_WEB\\_VERSION&COUNTRYKEY=84655](http://apps.who.int/nha/database/StandardReport.aspx?ID=REP_WEB_MINI_TEMP_LATE_WEB_VERSION&COUNTRYKEY=84655)  
10  
11 5  
12  
13  
14  
15  
16  
17  
18  
19  
20  
21  
22  
23  
24  
25  
26  
27  
28  
29  
30  
31  
32  
33  
34  
35  
36  
37  
38  
39  
40  
41  
42  
43  
44  
45  
46  
47  
48  
49  
50  
51  
52  
53  
54  
55  
56  
57  
58  
59  
60

For peer review only
